# Supplementary material for: Squaramide-catalyzed enantioselective Michael addition of nitromethane to 2-enoylazaarenes: synthesis of chiral azaarene-containing γ-nitroketones
Source: Royal Society of Chemistry journal article supplement (doi:10.1039/d4ra03826f), 2024-01-01
Supplement: d4ra03826f1.pdf [file d4ra03826f1.pdf]

## Supporting Information

### **Squaramide-Catalyzed Enantioselective Michael Addition of Nitromethane to 2-Enoylazaarenes: Synthesis of Chiral Azaarene-Containing $\gamma$ -Nitroketones**

Hong-Ping Huang<sup>§</sup>, Yu-Hang Xie<sup>§</sup>, Xu-Mei Gan, Xin-Yu Wen, Cui-Xia Wang, Yan-Qiu Deng\*, Zhen-Wei Zhang<sup>\*a</sup>

<sup>a</sup> College of Pharmacy, Guangxi Zhuang Yao Medicine Center of Engineering and Technology, Guangxi University of Chinese Medicine, Nanning, Guangxi 530200, P. R. of China

\* Correspondence to E-mail: charliezh@163.com (Z.-W. Zhang), dengyanqiu0501@163.com (Q.-Y. Deng)

<sup>§</sup> These two authors contribute equally.

## Table of Contents

|                                                                         |     |
|-------------------------------------------------------------------------|-----|
| <b>1. Experimental section</b> .....                                    | S3  |
| <i>1.1. General experimental details</i> .....                          | S3  |
| <i>1.2. Experimental methods</i> .....                                  | S3  |
| <b>2. NMR spectra of products 2a-2w and 3a</b> .....                    | S11 |
| <b>3. HPLC traces of racemic and chiral products 2a-2w and 3a</b> ..... | S35 |
| <b>4. References</b> .....                                              | S59 |

## 1. Experimental section

### 1.1. General experimental details

All reagents were purchased from commercial suppliers and used without further purification. All solvents were purified by standard operating method. The crude products were subjected to column chromatography using silica gel (200-300 mesh). The specific rotation was measured by Yimai IP-digi300/8 automatic digital polarimeter (Shanghai, China): The length of the polariscope tube was 0.5 dm, the wavelength was 589.44 nm, and the temperature was 20 °C. NMR spectra were obtained on a Bruker Avance III (400 MHz or 500 MHz, Switzerland) spectrometer. Chemical shifts were published as parts per million (ppm) in  $\delta$  units with tetramethylsilane (TMS,  $\delta = 0.00$  ppm) as the referenced standard. The enantiomeric excesses (*e.e.*) of chiral products were determined by chiral HPLC analysis employing a Shimadzu LC-20AT instrument (Japan) with Daicel Chiralcel AD-H, OD-H, IC or IA column (0.46 cm diameter  $\times$  25 cm length) in comparison with racemic samples and n-hexane/*i*-PrOH as the eluent. Bifunctional catalysts **R1-R3**,<sup>1</sup> **Q4-CN7**,<sup>2, 3</sup> and substrates<sup>4-10</sup> from (*E*)-**1a** to (*E*)-**1w** were prepared according to the literature procedures. The absolute configuration of the products was assigned by comparing HPLC and optical rotation with the literature data or by analogy to other compounds.

### 1.2. Experimental methods

**General procedure:** 2-Enoylazaarenes **1a-1w** (0.10 mmol), nitromethane (1 mL) and catalyst **Q4** (10 mol%, 0.01 mmol) were added to an 8 mL glassware bottle and the mixture was stirred in an oil bath at 25°C. After the reaction finished (monitored by TLC), the solvent was removed under vacuum on rotary evaporator, and the crude mixture was subjected to flash chromatography on silica gel (petroleum ether/EtOAc = 8:1) to obtain the corresponding products **2a-2w**.

Physical and spectral data of the products **2a-2w** are listed as following:

#### (*R*)-(+)-4-Nitro-3-phenyl-1-(pyridin-2-yl)butan-1-one (**2a**)<sup>11-13</sup>

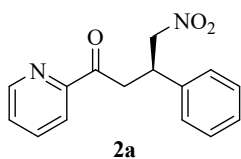

98% yield, white solid, 98% ee determined by HPLC (Daicel Chiralcel AD-H, n-hexane/*i*-PrOH = 95/5, 30°C, flow rate 1.0 mL/min, UV detection at 254 nm):  $t_{\text{minor}} = 22.9$  min,  $t_{\text{major}} = 24.9$  min.  $[\alpha]_{\text{D}}^{20} = +44.8$  (c 0.50, CH<sub>2</sub>Cl<sub>2</sub>). <sup>1</sup>H NMR (500 MHz, CDCl<sub>3</sub>):  $\delta$  8.67 (ddd,  $J = 4.7, 1.8, 0.9$  Hz, 1H), 7.99 (dt,  $J = 7.9, 1.1$  Hz, 1H), 7.83 (td,  $J = 7.7, 1.7$  Hz, 1H), 7.48 (ddd,  $J = 7.6, 4.8, 1.3$  Hz, 1H), 7.34-7.21 (m, 5H), 4.79 (dd,  $J = 12.4, 6.8$  Hz, 1H), 4.68 (dd,  $J = 12.4, 8.2$  Hz, 1H), 4.30-4.21 (m, 1H), 3.84 (dd,  $J = 18.2, 7.1$  Hz, 1H), 3.63 (dd,  $J = 18.2, 7.2$  Hz, 1H).

#### (*R*)-(+)-3-(2-Fluorophenyl)-4-nitro-1-(pyridin-2-yl)butan-1-one (**2b**)<sup>12</sup>

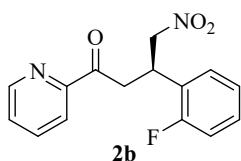

97% yield, white solid, 98% ee determined by HPLC (Daicel Chiralcel AD-H, n-hexane/*i*-PrOH = 90/10, 30°C, flow rate 1.0 mL/min, UV detection at 254 nm):  $t_{\text{minor}} = 13.6$  min,  $t_{\text{major}} = 14.5$  min.  $[\alpha]_{\text{D}}^{20} = +32.9$  (c 0.51, CH<sub>2</sub>Cl<sub>2</sub>). <sup>1</sup>H NMR (500 MHz, CDCl<sub>3</sub>):  $\delta$  8.66

(ddd,  $J = 4.7, 1.7, 0.9$  Hz, 1H), 7.99 (dt,  $J = 7.9, 1.1$  Hz, 1H), 7.82 (td,  $J = 7.7, 1.7$  Hz, 1H), 7.48 (ddd,  $J = 7.5, 4.7, 1.2$  Hz, 1H), 7.31 (td,  $J = 7.6, 1.8$  Hz, 1H), 7.26-7.21 (m, 1H), 7.13-6.98 (m, 2H), 4.82 (qd,  $J = 12.7, 7.3$  Hz, 2H), 4.43 (p,  $J = 7.1$  Hz, 1H), 3.86 (dd,  $J = 18.5, 6.9$  Hz, 1H), 3.81-3.63 (m, 1H).  $^{13}\text{C}$  NMR (126 MHz,  $\text{CDCl}_3$ ):  $\delta$  198.56, 161.99, 160.03, 152.68, 149.05, 137.04, 130.06, 130.02, 129.52, 129.45, 127.60, 126.07, 125.97, 124.55, 124.53, 121.89, 116.15, 115.98, 78.15, 78.13, 39.57, 39.56, 34.72.

**(*R*)-(+)-4-Nitro-1-(pyridin-2-yl)-3-(2-(trifluoromethyl)phenyl)butan-1-one (2c)<sup>12</sup>**

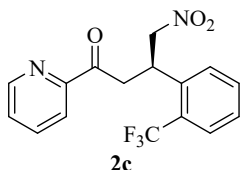

95% yield, white solid, 98% ee determined by HPLC (Daicel Chiralcel AD-H, n-hexane/*i*-PrOH = 98/2, 30°C, flow rate 1.0 mL/min, UV detection at 254 nm):  $t_{\text{minor}} = 25.3$  min,  $t_{\text{major}} = 27.7$  min.  $[\alpha]_{\text{D}}^{20} = +29.6$  (c 0.52,  $\text{CH}_2\text{Cl}_2$ ).  $^1\text{H}$  NMR (500 MHz,  $\text{CDCl}_3$ ):  $\delta$  8.65 (ddd,  $J = 4.8, 1.7, 0.9$  Hz, 1H), 8.01 (dt,  $J = 7.9, 1.1$  Hz, 1H), 7.83 (td,  $J = 7.8, 1.7$  Hz, 1H), 7.70 (dd,  $J = 8.0, 1.3$  Hz, 1H), 7.60-7.43 (m, 3H), 7.43-7.33 (m, 1H), 4.81 (qd,  $J = 12.5, 6.9$  Hz, 2H), 4.71-4.63 (m, 1H), 3.86-3.72 (m, 2H).  $^{13}\text{C}$  NMR (126 MHz,  $\text{CDCl}_3$ ):  $\delta$  198.16, 152.60, 149.01, 138.15, 137.08, 132.40, 128.87, 128.64, 127.74, 127.66, 126.85, 126.80, 126.75, 126.71, 125.29, 123.11, 121.95, 78.71, 40.95, 34.58, 34.57.

**(*R*)-(+)-3-(2-Chlorophenyl)-4-nitro-1-(pyridin-2-yl)butan-1-one (2d)<sup>11</sup>**

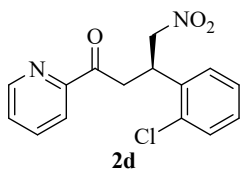

98% yield, white solid, 97% ee determined by HPLC (Daicel Chiralcel OD-H, n-hexane/*i*-PrOH = 85/15, 30°C, flow rate 1.0 mL/min, UV detection at 254 nm):  $t_{\text{minor}} = 13.9$  min,  $t_{\text{major}} = 17.0$  min.  $[\alpha]_{\text{D}}^{20} = +46.2$  (c 0.52,  $\text{CH}_2\text{Cl}_2$ ).  $^1\text{H}$  NMR (400 MHz,  $\text{CDCl}_3$ ):  $\delta$  8.67 (ddd,  $J = 4.7, 1.7, 0.9$  Hz, 1H), 8.00 (dt,  $J = 7.9, 1.1$  Hz, 1H), 7.83 (td,  $J = 7.7, 1.7$  Hz, 1H), 7.49 (ddd,  $J = 7.6, 4.7, 1.2$  Hz, 1H), 7.39 (dd,  $J = 7.5, 1.8$  Hz, 1H), 7.34 (dd,  $J = 7.5, 2.0$  Hz, 1H), 7.25-7.17 (m, 2H), 4.88-4.81 (m, 2H), 4.78-4.68 (m, 1H), 3.88 (dd,  $J = 18.6, 6.5$  Hz, 1H), 3.77 (dd,  $J = 18.6, 7.5$  Hz, 1H).  $^{13}\text{C}$  NMR (101 MHz,  $\text{CDCl}_3$ ):  $\delta$  198.54, 152.69, 149.05, 137.06, 136.47, 133.97, 130.34, 128.89, 128.43, 127.63, 127.34, 121.92, 77.89, 39.44, 35.92.

**(*R*)-(+)-3-(2-Bromophenyl)-4-nitro-1-(pyridin-2-yl)butan-1-one (2e)<sup>12</sup>**

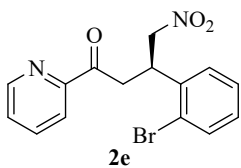

96% yield, white solid, 98% ee determined by HPLC (Daicel Chiralcel AD-H, n-hexane/*i*-PrOH = 95/5, 30°C, flow rate 1.0 mL/min, UV detection at 254 nm):  $t_{\text{minor}} = 20.5$  min,  $t_{\text{major}} = 22.1$  min.  $[\alpha]_{\text{D}}^{20} = +50.8$  (c 0.52,  $\text{CH}_2\text{Cl}_2$ ).  $^1\text{H}$  NMR (500 MHz,  $\text{CDCl}_3$ ):  $\delta$  8.67

(ddd,  $J = 4.8, 1.7, 0.9$  Hz, 1H), 8.00 (dt,  $J = 7.8, 1.1$  Hz, 1H), 7.83 (td,  $J = 7.7, 1.7$  Hz, 1H), 7.59 (dd,  $J = 7.9, 1.3$  Hz, 1H), 7.49 (ddd,  $J = 7.6, 4.7, 1.2$  Hz, 1H), 7.33-7.27 (m, 2H), 7.12 (ddd,  $J = 8.9, 7.3, 1.7$  Hz, 1H), 4.85-4.78 (m, 2H), 4.76-4.69 (m, 1H), 3.87 (dd,  $J = 18.5, 6.4$  Hz, 1H), 3.77 (dd,  $J = 18.5, 7.5$  Hz, 1H).  $^{13}\text{C}$  NMR (126 MHz,  $\text{CDCl}_3$ ):  $\delta$  198.49, 152.69, 149.04, 138.10, 137.06, 133.69, 129.15, 128.16, 127.97, 127.62, 124.67, 121.93, 77.98, 39.62, 38.13.

**(R)-(+)-4-Nitro-1-(pyridin-2-yl)-3-(*o*-tolyl)butan-1-one (2f)<sup>12</sup>**

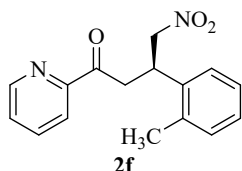

97% yield, white solid, 97% ee determined by HPLC (Daicel Chiralcel AD-H, n-hexane/*i*-PrOH = 95/5, 30°C, flow rate 1.0 mL/min, UV detection at 254 nm):  $t_{\text{minor}} = 15.2$  min,  $t_{\text{major}} = 16.3$  min.  $[\alpha]_{\text{D}}^{20} = +53.8$  (c 0.52,  $\text{CH}_2\text{Cl}_2$ ).  $^1\text{H}$  NMR (500 MHz,  $\text{CDCl}_3$ ):  $\delta$  8.66 (ddd,  $J = 4.8, 1.8, 0.9$  Hz, 1H), 7.97 (dt,  $J = 7.8, 1.1$  Hz, 1H), 7.81 (td,  $J = 7.7, 1.7$  Hz, 1H), 7.47 (ddd,  $J = 7.6, 4.7, 1.2$  Hz, 1H), 7.25-7.21 (m, 1H), 7.19-7.09 (m, 3H), 4.78-4.62 (m, 2H), 4.55 (p,  $J = 7.2$  Hz, 1H), 3.85 (dd,  $J = 18.1, 7.1$  Hz, 1H), 3.57 (dd,  $J = 18.0, 7.0$  Hz, 1H), 2.49 (s, 3H).  $^{13}\text{C}$  NMR (126 MHz,  $\text{CDCl}_3$ ):  $\delta$  198.77, 152.75, 148.99, 137.54, 137.03, 136.57, 131.05, 127.55, 127.39, 126.55, 125.62, 121.90, 79.34, 40.98, 34.44, 19.59.

**(R)-(+)-3-(3-Bromophenyl)-4-nitro-1-(pyridin-2-yl)butan-1-one (2g)<sup>11, 12</sup>**

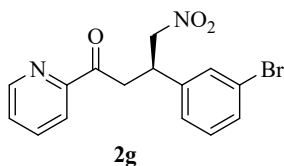

96% yield, white solid, 98% ee determined by HPLC (Daicel Chiralcel IC, n-hexane/*i*-PrOH = 97/3, 30°C, flow rate 1.0 mL/min, UV detection at 254 nm):  $t_{\text{major}} = 33.0$  min,  $t_{\text{minor}} = 36.4$  min.  $[\alpha]_{\text{D}}^{20} = +39.2$  (c 0.50,  $\text{CH}_2\text{Cl}_2$ ).  $^1\text{H}$  NMR (400 MHz,  $\text{CDCl}_3$ ):  $\delta$  8.67 (dt,  $J = 4.8, 1.4$  Hz, 1H), 7.99 (dt,  $J = 7.9, 1.1$  Hz, 1H), 7.83 (td,  $J = 7.8, 1.7$  Hz, 1H), 7.54-7.44 (m, 2H), 7.38 (dt,  $J = 7.8, 1.4$  Hz, 1H), 7.26 (dt,  $J = 7.9, 1.3$  Hz, 1H), 7.19 (t,  $J = 7.8$  Hz, 1H), 4.86-4.59 (m, 2H), 4.22 (m, 1H), 3.81 (dd,  $J = 18.3, 7.0$  Hz, 1H), 3.61 (dd,  $J = 18.3, 7.2$  Hz, 1H).  $^{13}\text{C}$  NMR (101 MHz,  $\text{CDCl}_3$ ):  $\delta$  198.24, 152.58, 149.05, 141.63, 137.10, 130.98, 130.71, 130.51, 127.71, 126.43, 122.97, 121.97, 79.45, 40.62, 38.92.

**(R)-(+)-3-(4-Bromophenyl)-4-nitro-1-(pyridin-2-yl)butan-1-one (2h)<sup>11, 12</sup>**

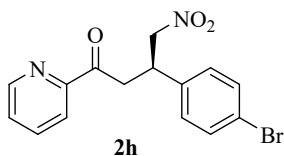

98% yield, white solid, 98% ee determined by HPLC (Daicel Chiralcel AD-H, n-hexane/*i*-PrOH = 90/10, 30°C, flow rate 1.0 mL/min, UV detection at 254 nm):  $t_{\text{minor}} = 18.9$  min,  $t_{\text{major}} = 21.7$  min.  $[\alpha]_{\text{D}}^{20} = +35.6$  (c 0.50,  $\text{CH}_2\text{Cl}_2$ ).  $^1\text{H}$  NMR (400 MHz,  $\text{CDCl}_3$ ):  $\delta$  8.66 (dt,  $J = 4.7, 1.2$  Hz, 1H), 7.99 (d,  $J = 7.8$  Hz, 1H), 7.83 (td,  $J = 7.7, 1.7$  Hz, 1H), 7.49 (ddd,  $J = 7.6, 4.7, 1.3$  Hz, 1H), 7.47-7.41 (m, 2H), 7.25-7.14 (m, 2H), 4.82-4.60 (m, 2H), 4.28-4.16 (m, 1H), 3.81 (dd,  $J = 18.2, 7.3$  Hz, 1H), 3.59 (dd,  $J = 18.2, 6.9$  Hz, 1H).  $^{13}\text{C}$  NMR (101 MHz,  $\text{CDCl}_3$ ):  $\delta$  198.30,

152.61, 149.04, 138.29, 137.10, 132.09, 129.37, 127.68, 121.95, 121.71, 79.56, 40.57, 38.82.

**(R)-(+)-3-(4-Chlorophenyl)-4-nitro-1-(pyridin-2-yl)butan-1-one (2i)<sup>11, 12</sup>**

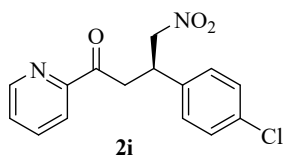

97% yield, white solid, 98% ee determined by HPLC (Daicel Chiralcel IA, n-hexane/i-PrOH = 95/5, 30°C, flow rate 1.0 mL/min, UV detection at 254

nm):  $t_{\text{minor}} = 27.5$  min,  $t_{\text{major}} = 29.8$  min.  $[\alpha]_D^{20} = +52.0$  (c 0.50, CH<sub>2</sub>Cl<sub>2</sub>). <sup>1</sup>H NMR (500 MHz, CDCl<sub>3</sub>):  $\delta$  8.66 (ddd,  $J = 4.8, 1.8, 0.9$  Hz, 1H), 7.98 (dt,  $J = 8.0, 1.1$  Hz, 1H), 7.82 (td,  $J = 7.7, 1.8$  Hz, 1H), 7.48 (ddd,  $J = 7.6, 4.8, 1.3$  Hz, 1H), 7.30-7.24 (m, 4H), 4.82-4.61 (m, 2H), 4.28-4.19 (m, 1H), 3.80 (dd,  $J = 18.2, 7.3$  Hz, 1H), 3.59 (dd,  $J = 18.2, 7.0$  Hz, 1H). <sup>13</sup>C NMR (126 MHz, CDCl<sub>3</sub>):  $\delta$  198.34, 152.61, 149.04, 137.74, 137.10, 133.60, 129.14, 129.02, 127.69, 121.95, 79.65, 40.62, 38.75.

**(R)-(+)-4-Nitro-3-(4-nitrophenyl)-1-(pyridin-2-yl)butan-1-one (2j)<sup>11</sup>**

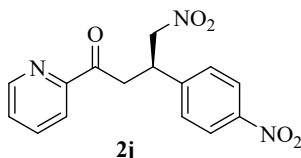

96% yield, white solid, 97% ee determined by HPLC (Daicel Chiralcel AD-H, n-hexane/i-PrOH = 75/25, 30°C, flow rate 1.0 mL/min, UV

detection at 254 nm):  $t_{\text{minor}} = 17.8$  min,  $t_{\text{major}} = 23.7$  min.  $[\alpha]_D^{20} = +47.2$  (c 0.50, CH<sub>2</sub>Cl<sub>2</sub>). <sup>1</sup>H NMR (400 MHz, CDCl<sub>3</sub>):  $\delta$  8.67 (dt,  $J = 4.7, 1.2$  Hz, 1H), 8.29-8.07 (m, 2H), 8.06-7.96 (m, 1H), 7.92-7.78 (m, 1H), 7.67-7.40 (m, 3H), 4.92-4.67 (m, 2H), 4.46-4.34 (m, 1H), 3.87 (dd,  $J = 18.4, 7.5$  Hz, 1H), 3.66 (dd,  $J = 18.4, 6.7$  Hz, 1H). <sup>13</sup>C NMR (101 MHz, CDCl<sub>3</sub>):  $\delta$  197.88, 152.37, 149.11, 147.46, 146.76, 137.20, 128.77, 127.90, 124.16, 121.99, 79.06, 40.42, 39.06.

**(R)-(+)-4-Nitro-1-(pyridin-2-yl)-3-(p-tolyl)butan-1-one (2k)<sup>12</sup>**

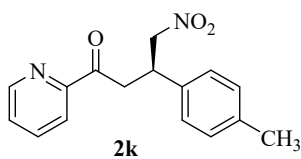

97% yield, white solid, 96% ee determined by HPLC (Daicel Chiralcel AD-H, n-hexane/i-PrOH = 95/5, 30°C, flow rate 1.0 mL/min, UV detection

at 254 nm):  $t_{\text{minor}} = 19.5$  min,  $t_{\text{major}} = 22.3$  min.  $[\alpha]_D^{20} = +52.9$  (c 0.51, CH<sub>2</sub>Cl<sub>2</sub>). <sup>1</sup>H NMR (500 MHz, CDCl<sub>3</sub>):  $\delta$  8.66 (ddd,  $J = 4.9, 1.8, 0.9$  Hz, 1H), 7.98 (dt,  $J = 7.8, 1.1$  Hz, 1H), 7.81 (td,  $J = 7.7, 1.7$  Hz, 1H), 7.48 (ddd,  $J = 7.6, 4.7, 1.2$  Hz, 1H), 7.23-7.16 (m, 2H), 7.12 (d,  $J = 7.9$  Hz, 2H), 4.76 (dd,  $J = 12.4, 6.8$  Hz, 1H), 4.65 (dd,  $J = 12.4, 8.3$  Hz, 1H), 4.30-4.11 (m, 1H), 3.81 (dd,  $J = 18.2, 7.2$  Hz, 1H), 3.61 (dd,  $J = 18.2, 7.1$  Hz, 1H), 2.29 (s, 3H). <sup>13</sup>C NMR (126 MHz, CDCl<sub>3</sub>):  $\delta$  198.70, 152.80, 149.00, 137.40, 137.01, 136.20, 129.63, 127.53, 127.44, 121.92, 80.06, 40.82, 38.97, 21.05.

**(R)-(+)-3-(4-Methoxyphenyl)-4-nitro-1-(pyridin-2-yl)butan-1-one (2l)<sup>11, 12</sup>**

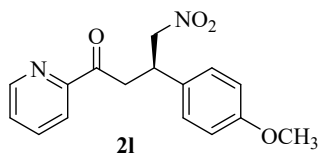

90% yield, white solid, 97% ee determined by HPLC (Daicel Chiralcel S6

AD-H, n-hexane/i-PrOH = 90/10, 30°C, flow rate 1.0 mL/min, UV detection at 254 nm):  $t_{\text{minor}} = 21.5$  min,  $t_{\text{major}} = 23.6$  min.  $[\alpha]_{\text{D}}^{20} = +44.6$  (c 0.52, CH<sub>2</sub>Cl<sub>2</sub>). <sup>1</sup>H NMR (400 MHz, CDCl<sub>3</sub>):  $\delta$  8.66 (ddd,  $J = 4.8, 1.7, 1.0$  Hz, 1H), 7.98 (dt,  $J = 7.9, 1.1$  Hz, 1H), 7.81 (td,  $J = 7.7, 1.7$  Hz, 1H), 7.47 (ddd,  $J = 7.6, 4.8, 1.3$  Hz, 1H), 7.25-7.18 (m, 2H), 6.88-6.77 (m, 2H), 4.80-4.59 (m, 2H), 4.25-4.15 (m, 1H), 3.80 (dd,  $J = 18.1, 7.3$  Hz, 1H), 3.76 (s, 3H), 3.58 (dd,  $J = 18.1, 7.1$  Hz, 1H). <sup>13</sup>C NMR (101 MHz, CDCl<sub>3</sub>):  $\delta$  198.72, 159.00, 152.79, 149.00, 137.03, 131.17, 128.64, 127.54, 121.92, 114.32, 80.17, 55.23, 40.86, 38.64.

**(S)-(+)-3-(Furan-2-yl)-4-nitro-1-(pyridin-2-yl)butan-1-one (2m)<sup>11, 12</sup>**

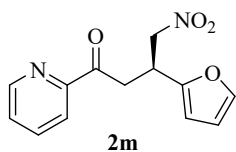

80% yield, white solid, 97% ee determined by HPLC (Daicel Chiralcel OD-H, n-hexane/i-PrOH = 85/15, 30°C, flow rate 1.0 mL/min, UV detection at 254 nm):  $t_{\text{minor}} = 10.8$  min,  $t_{\text{major}} = 12.0$  min  $[\alpha]_{\text{D}}^{20} = +26.7$  (c 0.54, CH<sub>2</sub>Cl<sub>2</sub>). <sup>1</sup>H NMR (400 MHz, CDCl<sub>3</sub>):  $\delta$  8.68 (ddd,  $J = 4.8, 1.7, 0.9$  Hz, 1H), 8.03 (dt,  $J = 8.0, 1.1$  Hz, 1H), 7.85 (td,  $J = 7.7, 1.7$  Hz, 1H), 7.50 (ddd,  $J = 7.6, 4.8, 1.3$  Hz, 1H), 7.33 (dd,  $J = 1.8, 0.8$  Hz, 1H), 6.35-6.15 (m, 2H), 4.77 (d,  $J = 6.9$  Hz, 2H), 4.41-4.31 (m, 1H), 3.84 (dd,  $J = 18.4, 6.7$  Hz, 1H), 3.64 (dd,  $J = 18.4, 7.2$  Hz, 1H). <sup>13</sup>C NMR (101 MHz, CDCl<sub>3</sub>):  $\delta$  198.34, 152.65, 152.16, 149.08, 142.26, 137.06, 127.64, 121.94, 110.42, 107.12, 77.47, 38.47, 33.16.

**(S)-(+)-4-Nitro-1-(pyridin-2-yl)-3-(thiophen-2-yl)butan-1-one (2n)<sup>11, 12</sup>**

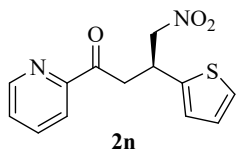

87% yield, white solid, 96% ee determined by HPLC (Daicel Chiralcel OD-H, n-hexane/i-PrOH = 85/15, 30°C, flow rate 1.0 mL/min, UV detection at 254 nm):  $t_{\text{minor}} = 15.5$  min,  $t_{\text{major}} = 18.7$  min  $[\alpha]_{\text{D}}^{20} = +55.6$  (c 0.50, CH<sub>2</sub>Cl<sub>2</sub>). <sup>1</sup>H NMR (400 MHz, CDCl<sub>3</sub>):  $\delta$  8.68 (ddd,  $J = 4.8, 1.7, 0.9$  Hz, 1H), 8.03 (dt,  $J = 8.0, 1.1$  Hz, 1H), 7.85 (td,  $J = 7.7, 1.7$  Hz, 1H), 7.50 (ddd,  $J = 7.6, 4.8, 1.3$  Hz, 1H), 7.33 (dd,  $J = 1.8, 0.8$  Hz, 1H), 6.28 (dd,  $J = 3.3, 1.9$  Hz, 1H), 6.20 (dt,  $J = 3.2, 0.8$  Hz, 1H), 4.77 (d,  $J = 6.9$  Hz, 2H), 4.41-4.31 (m, 1H), 3.84 (dd,  $J = 18.4, 6.7$  Hz, 1H), 3.64 (dd,  $J = 18.4, 7.2$  Hz, 1H). <sup>13</sup>C NMR (126 MHz, CDCl<sub>3</sub>):  $\delta$  198.22, 152.64, 149.07, 142.10, 137.06, 127.66, 127.07, 125.55, 124.65, 121.97, 80.17, 77.25, 41.67, 34.74.

**(S)-(+)-3-(Nitromethyl)-5-phenyl-1-(pyridin-2-yl)pentan-1-one (2o)**

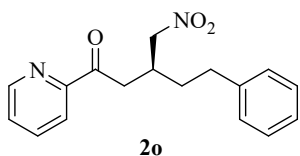

97% yield, colourless oil, 97% ee determined by HPLC (Daicel Chiralcel IA, n-hexane/i-PrOH = 98/2, 30°C, flow rate 1.0 mL/min, UV detection at 254 nm):  $t_{\text{minor}} = 24.4$  min,  $t_{\text{major}} = 25.8$  min.  $[\alpha]_{\text{D}}^{20} = +8.6$  (c 0.35, CH<sub>2</sub>Cl<sub>2</sub>). <sup>1</sup>H NMR (500 MHz, CDCl<sub>3</sub>):  $\delta$  8.68 (dt,  $J = 4.8, 1.4$  Hz, 1H), 8.05 (dt,  $J = 7.8, 1.2$  Hz, 1H), 7.86 (td,  $J = 7.7, 1.7$  Hz, 1H), 7.50 (ddd,  $J = 7.6, 4.8, 1.3$  Hz, 1H), 7.32-7.25 (m, 2H), 7.18 (ddd,  $J = 8.5, 7.1, 1.6$  Hz, 3H), 4.68-4.49 (m, 2H), 3.45

(d,  $J = 6.5$  Hz, 2H), 2.97-2.89 (m, 1H), 2.74 (ddd,  $J = 10.7, 6.3, 2.8$  Hz, 2H), 1.90-1.77 (m, 2H).  $^{13}\text{C}$  NMR (126 MHz,  $\text{CDCl}_3$ ):  $\delta$  199.76, 152.94, 149.03, 141.00, 137.07, 128.54, 128.32, 127.55, 126.17, 121.86, 78.69, 38.88, 33.53, 33.08, 32.88.

**(R)-(+)-3-Cyclohexyl-4-nitro-1-(pyridin-2-yl)butan-1-one (2p)<sup>14</sup>**

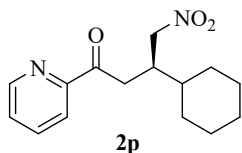

90% yield, colourless oil, 95% ee determined by HPLC (Daicel Chiralcel AD-H, n-hexane/*i*-PrOH = 85/15, 30°C, flow rate 1.0 mL/min, UV detection at 254 nm):  $t_{\text{minor}} = 6.8$  min,  $t_{\text{major}} = 7.6$  min.  $[\alpha]_{\text{D}}^{20} = +9.6$  (c 0.31,  $\text{CH}_2\text{Cl}_2$ ).  $^1\text{H}$  NMR (500 MHz,  $\text{CDCl}_3$ ):  $\delta$  8.68 (d,  $J = 4.7$  Hz, 1H), 8.04 (d,  $J = 7.8$  Hz, 1H), 7.86 (td,  $J = 7.7, 1.7$  Hz, 1H), 7.50 (dd,  $J = 7.5, 4.8$  Hz, 1H), 4.52 (d,  $J = 6.7$  Hz, 2H), 3.48 (dd,  $J = 18.4, 5.0$  Hz, 1H), 3.27 (dd,  $J = 18.4, 7.9$  Hz, 1H), 2.97-2.72 (m, 1H), 1.80-1.73 (m, 4H), 1.70-1.64 (m, 1H), 1.51 (m, 1H), 1.30-1.02 (m, 5H).

**(R)-(+)-4,4-Dimethyl-3-(nitromethyl)-1-(pyridin-2-yl)pentan-1-one (2q)<sup>11</sup>**

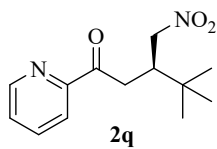

30% yield, colourless oil, 91% ee determined by HPLC (Daicel Chiralcel AD-H, n-hexane/*i*-PrOH = 98/2, 30°C, flow rate 1.0 mL/min, UV detection at 254 nm):  $t_{\text{minor}} = 13.5$  min,  $t_{\text{major}} = 14.3$  min.  $[\alpha]_{\text{D}}^{20} = +8.8$  (c 0.14,  $\text{CH}_2\text{Cl}_2$ ).  $^1\text{H}$  NMR (500 MHz,  $\text{CDCl}_3$ ):  $\delta$  8.68 (ddd,  $J = 4.7, 1.8, 0.9$  Hz, 1H), 8.04 (dt,  $J = 7.9, 1.1$  Hz, 1H), 7.84 (td,  $J = 7.7, 1.8$  Hz, 1H), 7.49 (ddd,  $J = 7.6, 4.8, 1.2$  Hz, 1H), 4.60 (dd,  $J = 12.6, 4.6$  Hz, 1H), 4.35 (dd,  $J = 12.6, 8.0$  Hz, 1H), 3.59 (dd,  $J = 18.3, 4.4$  Hz, 1H), 3.24 (dd,  $J = 18.3, 7.5$  Hz, 1H), 3.07-2.91 (m, 1H), 1.00 (s, 9H).

**(R)-(+)-4-Nitro-3-phenyl-1-(pyrazin-2-yl)butan-1-one (2r)<sup>14</sup>**

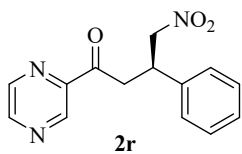

97% yield, white solid, 96% ee determined by HPLC (Daicel Chiralcel AD-H, n-hexane/*i*-PrOH = 85/15, 30°C, flow rate 1.0 mL/min, UV detection at 254 nm):  $t_{\text{minor}} = 15.9$  min,  $t_{\text{major}} = 17.2$  min.  $[\alpha]_{\text{D}}^{20} = +27.9$  (c 0.51,  $\text{CH}_2\text{Cl}_2$ ).  $^1\text{H}$  NMR (500 MHz,  $\text{CDCl}_3$ ):  $\delta$  9.17 (d,  $J = 1.5$  Hz, 1H), 8.77 (d,  $J = 2.5$  Hz, 1H), 8.63 (dd,  $J = 2.5, 1.5$  Hz, 1H), 7.42-7.15 (m, 5H), 4.86-4.61 (m, 2H), 4.25 (m, 1H), 3.82 (dd,  $J = 18.3, 7.4$  Hz, 1H), 3.60 (dd,  $J = 18.3, 6.8$  Hz, 1H).  $^{13}\text{C}$  NMR (126 MHz,  $\text{CDCl}_3$ ):  $\delta$  198.25, 152.54, 149.06, 141.66, 137.13, 130.96, 130.72, 130.53, 127.75, 126.44, 122.94, 121.97, 79.45, 40.62, 38.90.

**(R)-(+)-3-(4-Bromophenyl)-4-nitro-1-(pyrazin-2-yl)butan-1-one (2s)**

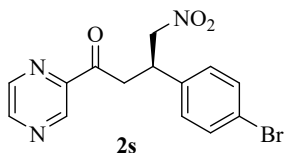



97% yield, white solid, 97% ee determined by HPLC (Daicel Chiralcel AD-H, n-hexane/i-PrOH = 70/30, 30°C, flow rate 1.0 mL/min, UV detection at 254 nm):  $t_{\text{minor}} = 11.7$  min,  $t_{\text{major}} = 13.9$  min.  $[\alpha]_{\text{D}}^{20} = +12.4$  (c 0.58, CH<sub>2</sub>Cl<sub>2</sub>). <sup>1</sup>H NMR (500 MHz, CDCl<sub>3</sub>): δ 9.18 (d,  $J = 1.5$  Hz, 1H), 8.78 (d,  $J = 2.4$  Hz, 1H), 8.63 (t,  $J = 2.0$  Hz, 1H), 7.54-7.40 (m, 2H), 7.26-7.14 (m, 2H), 4.89-4.57 (m, 2H), 4.22 (t,  $J = 7.3$  Hz, 1H), 3.79 (dd,  $J = 18.4, 7.5$  Hz, 1H), 3.57 (dd,  $J = 18.4, 6.6$  Hz, 1H). <sup>13</sup>C NMR (126 MHz, CDCl<sub>3</sub>): δ 197.80, 148.42, 146.75, 143.72, 143.60, 137.80, 132.23, 129.31, 121.94, 79.39, 40.58, 38.51.

**(R)-(+)-4-Nitro-1-(pyrazin-2-yl)-3-(p-tolyl)butan-1-one(2t)**

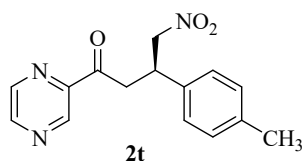

96% yield, white solid, 96% ee determined by HPLC (Daicel Chiralcel AD-H, n-hexane/i-PrOH = 70/30, 30°C, flow rate 1.0 mL/min, UV detection at 254 nm):  $t_{\text{minor}} = 10.2$  min,  $t_{\text{major}} = 11.6$  min.  $[\alpha]_{\text{D}}^{20} = +54.8$  (c 0.46, CH<sub>2</sub>Cl<sub>2</sub>). <sup>1</sup>H NMR (500 MHz, CDCl<sub>3</sub>): δ 9.18 (s, 1H), 8.77 (s, 1H), 8.64 (s, 1H), 7.22-7.08 (m, 4H), 4.83-4.62 (m, 2H), 4.25-4.17 (m, 1H), 3.80 (dd,  $J = 18.2, 7.5$  Hz, 1H), 3.57 (dd,  $J = 18.2, 6.7$  Hz, 1H), 2.30 (s, 3H). <sup>13</sup>C NMR (126 MHz, CDCl<sub>3</sub>): δ 198.21, 148.22, 146.97, 143.69, 143.61, 137.67, 135.70, 129.74, 127.39, 79.90, 40.82, 38.73, 21.08.

**(R)-(+)-4-Nitro-3-phenyl-1-(thiazol-2-yl)butan-1-one (2u)<sup>14</sup>**

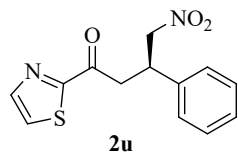

98% yield, white solid, 96% ee determined by HPLC (Daicel Chiralcel OD-H, n-hexane/i-PrOH = 80/20, 30°C, flow rate 1.0 mL/min, UV detection at 254 nm):  $t_{\text{major}} = 19.3$  min,  $t_{\text{minor}} = 21.7$  min.  $[\alpha]_{\text{D}}^{20} = +9.8$  (c 0.51, CH<sub>2</sub>Cl<sub>2</sub>). <sup>1</sup>H NMR (500 MHz, CDCl<sub>3</sub>): δ 8.00 (d,  $J = 3.0$  Hz, 1H), 7.69 (d,  $J = 3.0$  Hz, 1H), 7.37-7.24 (m, 5H), 4.83-4.66 (m, 2H), 4.31-4.22 (m, 1H), 3.77 (dd,  $J = 17.8, 7.3$  Hz, 1H), 3.58 (dd,  $J = 17.8, 7.0$  Hz, 1H). <sup>13</sup>C NMR (126 MHz, CDCl<sub>3</sub>): 190.62, 166.22, 144.87, 138.58, 129.08, 127.98, 127.55, 126.90, 79.61, 41.49, 39.18.

**(R)-(+)-3-(4-Bromophenyl)-4-nitro-1-(thiazol-2-yl)butan-1-one (2v)<sup>14</sup>**

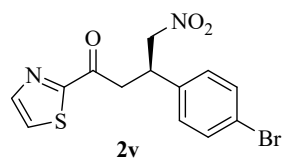

98% yield, white solid, 96% ee determined by HPLC (Daicel Chiralcel AD-H, n-hexane/i-PrOH = 95/05, 30°C, flow rate 1.0 mL/min, UV detection at 254 nm):  $t_{\text{minor}} = 40.0$  min,  $t_{\text{major}} = 43.5$  min.  $[\alpha]_{\text{D}}^{20} = +2.4$  (c 0.58, CH<sub>2</sub>Cl<sub>2</sub>). <sup>1</sup>H NMR (500 MHz, CDCl<sub>3</sub>): δ 8.00 (d,  $J = 3.0$  Hz, 1H), 7.71 (d,  $J = 3.0$  Hz, 1H), 7.52-7.39 (m, 2H), 7.24-7.13 (m, 2H), 4.86-4.59 (m, 2H), 4.22 (p,  $J = 7.1$  Hz, 1H), 3.74 (dd,  $J = 17.8, 7.6$  Hz, 1H), 3.54 (dd,  $J = 17.8, 6.9$  Hz, 1H). <sup>13</sup>C NMR (126 MHz, CDCl<sub>3</sub>): δ 190.32, 165.99, 144.93, 137.61, 132.21, 129.33, 127.11, 121.95, 79.28, 41.25, 38.67.

**(R)-(+)-4-Nitro-1-(thiazol-2-yl)-3-(*p*-tolyl)butan-1-one (2w)**

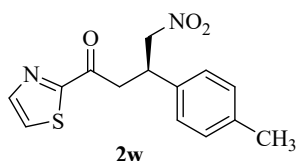

97% yield, white solid, 96% ee determined by HPLC (Daicel Chiralcel OD-H, n-hexane/*i*-PrOH = 90/10, 30°C, flow rate 1.0 mL/min, UV detection at 254 nm):  $t_{\text{major}} = 24.9$  min,  $t_{\text{minor}} = 31.7$  min.  $[\alpha]_{\text{D}}^{20} = +5.6$  (c 0.58, CH<sub>2</sub>Cl<sub>2</sub>). <sup>1</sup>H NMR (500 MHz, CDCl<sub>3</sub>): δ 8.00 (d,  $J = 3.0$  Hz, 1H), 7.69 (d,  $J = 3.0$  Hz, 1H), 7.21-7.10 (m, 4H), 4.89-4.58 (m, 2H), 4.27-4.18 (m, 1H), 3.75 (dd,  $J = 17.7, 7.4$  Hz, 1H), 3.56 (dd,  $J = 17.7, 7.0$  Hz, 1H), 2.30 (s, 3H). <sup>13</sup>C NMR (126 MHz, CDCl<sub>3</sub>): δ 190.70, 166.28, 144.85, 137.69, 135.49, 129.75, 127.38, 126.85, 79.79, 41.52, 38.84, 21.09.

**Synthesis of 3a<sup>15-18</sup>**

A solution of **2a** (1.11 g, 4.1 mmol) and Zn dust (533 mg, 8.2 mmol) in THF/saturated NH<sub>4</sub>Cl (v/v 1:1, 12 mL) was stirred at room temperature for 2.5 h. The resulting mixture was extracted with ethyl acetate and dried over MgSO<sub>4</sub>. Purification by silica gel column chromatography (PE/EA = 1/1) furnished the product **3a** as an oil (350 mg, 1.47 mmol).

**(R)-(-)-2-(3-Phenyl-3,4-dihydro-2H-pyrrol-5-yl)pyridine *N*-oxide (3a)**

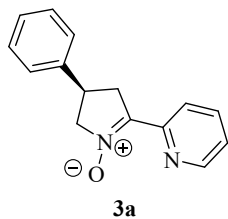

36% yield, colourless oil, 98% ee determined by HPLC (Daicel Chiralcel AD-H, n-hexane/*i*-PrOH = 90/10, 30°C, flow rate 1.0 mL/min, UV detection at 254 nm):  $t_{\text{major}} = 22.1$  min,  $t_{\text{minor}} = 24.8$  min.  $[\alpha]_{\text{D}}^{20} = -63.0$  (c 0.34, CH<sub>2</sub>Cl<sub>2</sub>). <sup>1</sup>H NMR (500 MHz, CDCl<sub>3</sub>): δ 9.32 (dd,  $J = 8.1, 1.2$  Hz, 1H), 8.66 (ddd,  $J = 4.8, 1.8, 1.0$  Hz, 1H), 7.84 (td,  $J = 7.9, 1.8$  Hz, 1H), 7.41-7.27 (m, 6H), 4.69-4.61 (m, 1H), 4.42 (ddt,  $J = 14.1, 7.6, 2.2$  Hz, 1H), 3.93-3.76 (m, 2H), 3.49-3.41 (m, 1H). <sup>13</sup>C NMR (126 MHz, CDCl<sub>3</sub>): δ 149.37, 147.93, 142.33, 141.74, 136.70, 129.08, 127.33, 126.73, 124.53, 123.46, 72.02, 39.02, 36.00. MS (ESI):  $m/z$  [M+H]<sup>+</sup> 239.1; [M+Na]<sup>+</sup> 261.1.

## 2. NMR spectra of products 2a-2w and 3a

$^1\text{H}$  NMR of compound **2a** (in  $\text{CDCl}_3$ ):

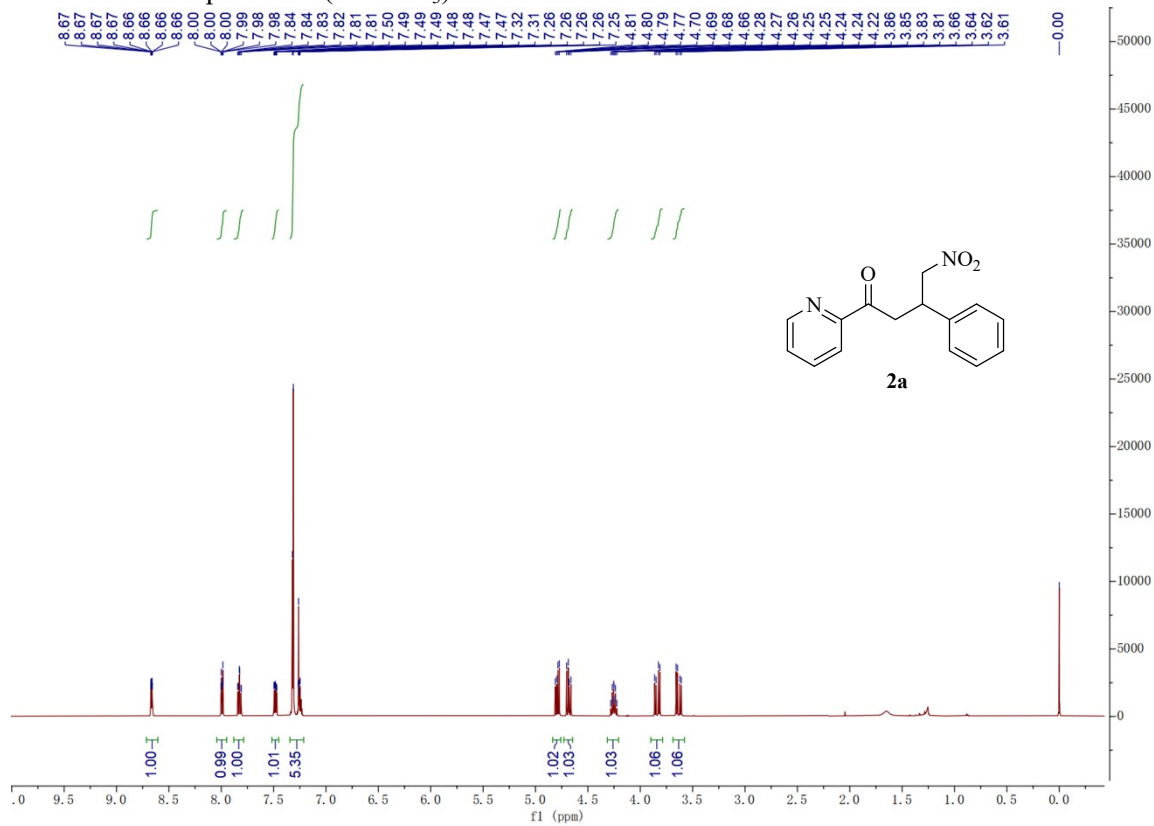

<sup>1</sup>H NMR of compound **2b** (in CDCl<sub>3</sub>):

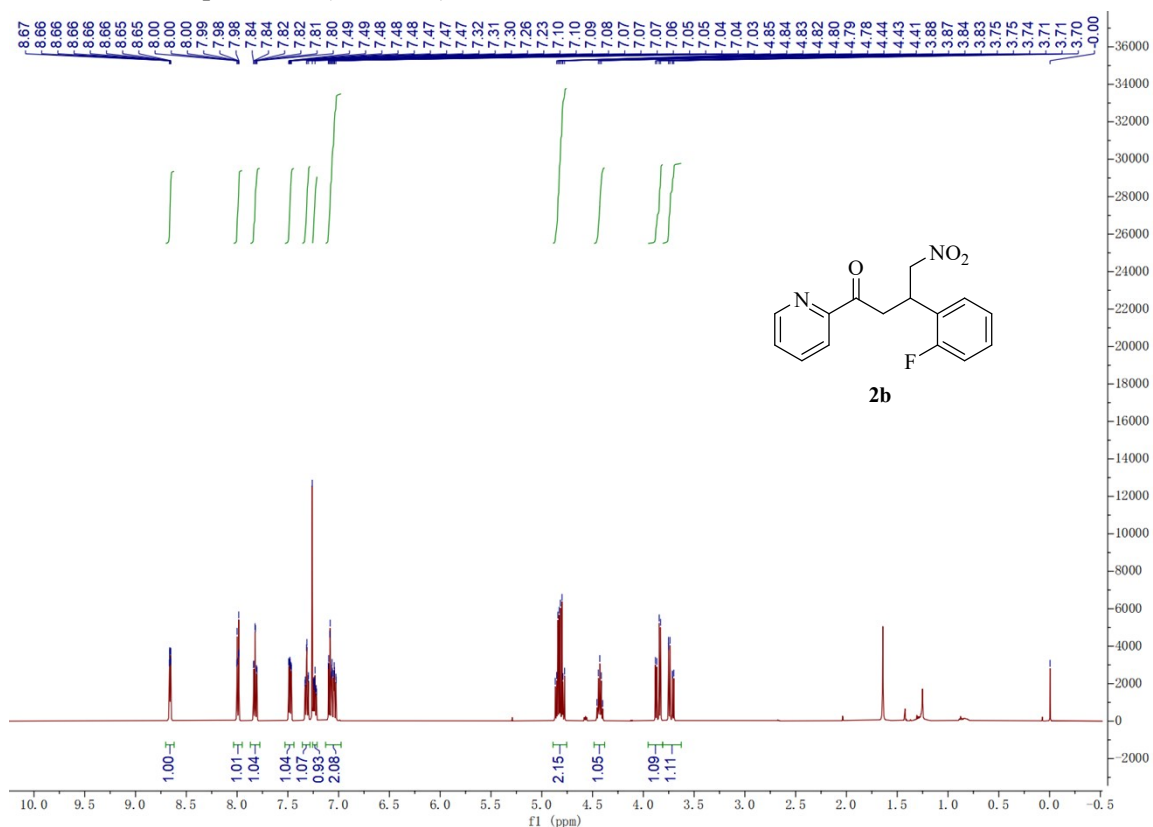

<sup>13</sup>C NMR of compound **2b** (in CDCl<sub>3</sub>):

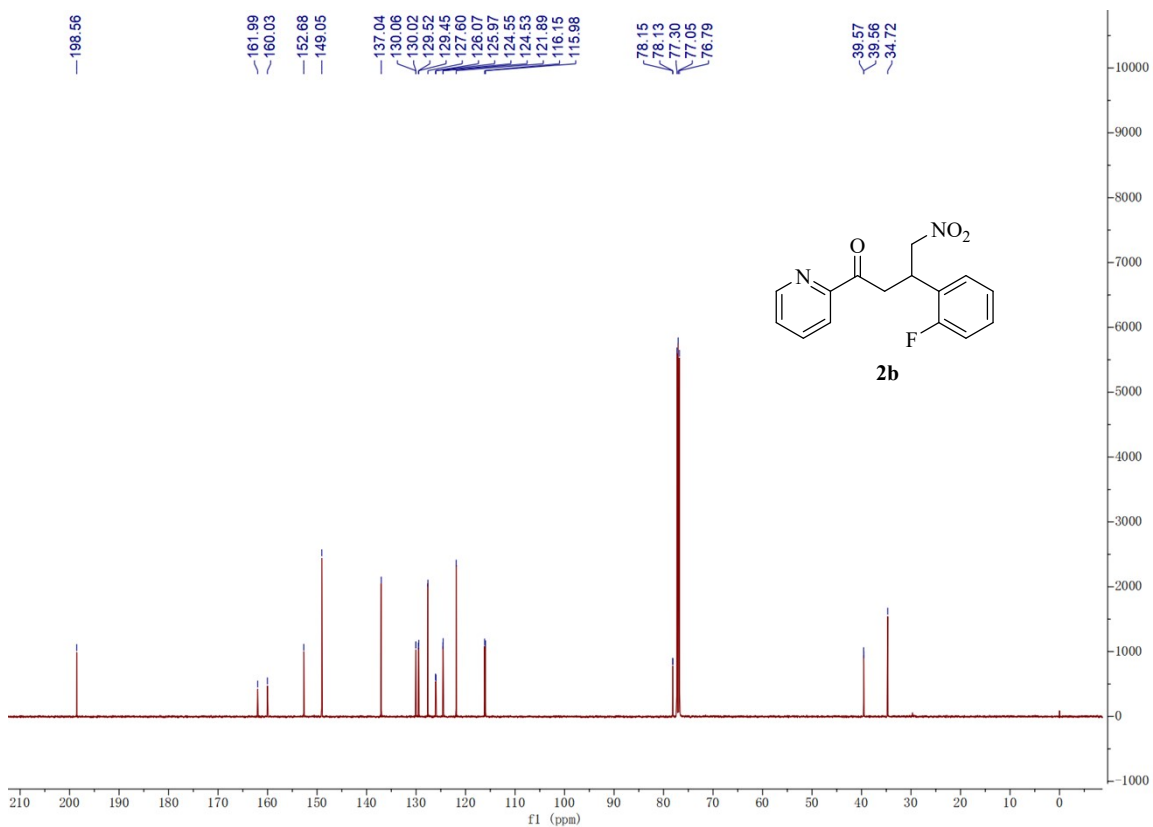

<sup>1</sup>H NMR of compound **2c** (in CDCl<sub>3</sub>):

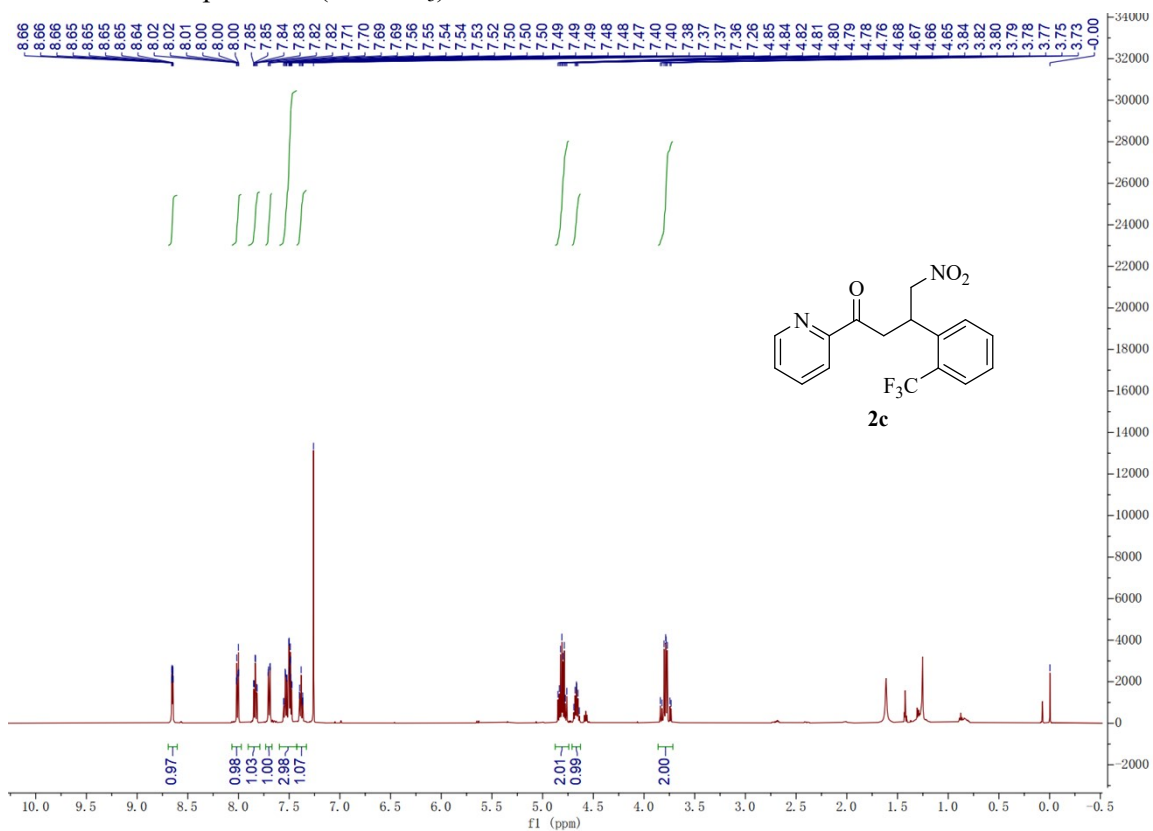

<sup>13</sup>C NMR of compound **2c** (in CDCl<sub>3</sub>):

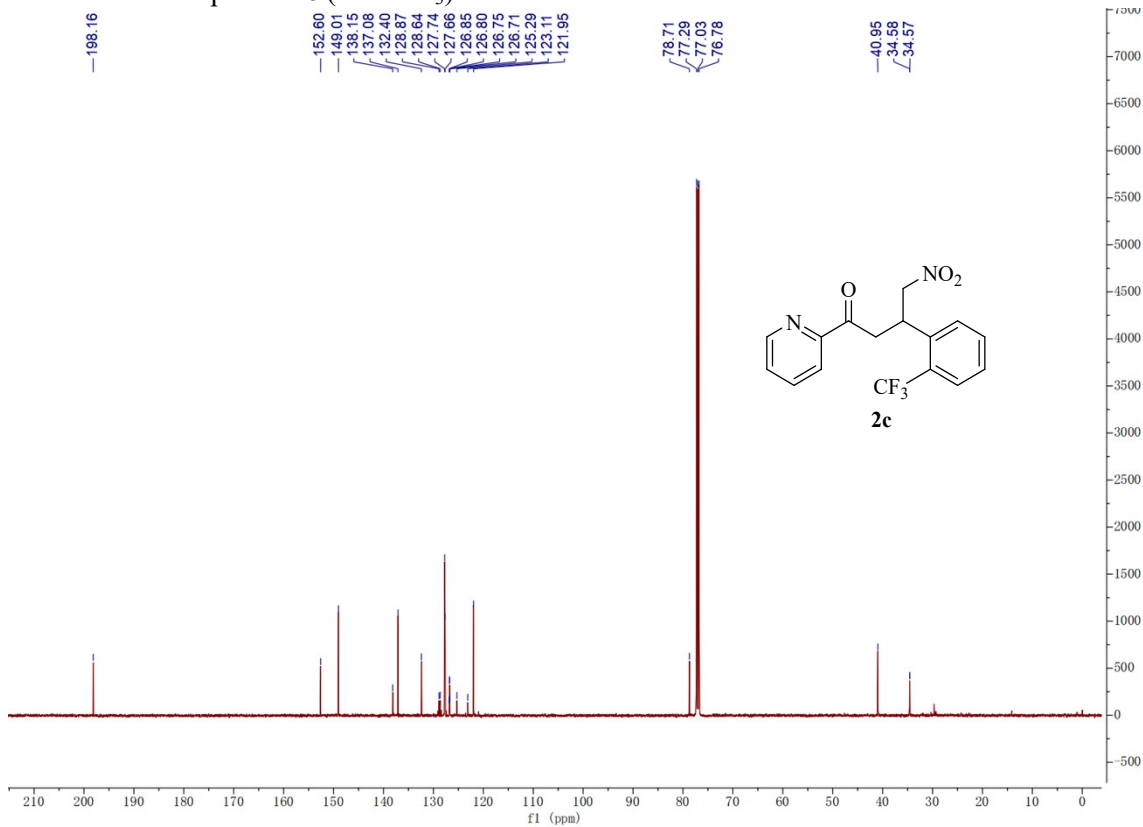

<sup>1</sup>H NMR of compound **2d** (in CDCl<sub>3</sub>):

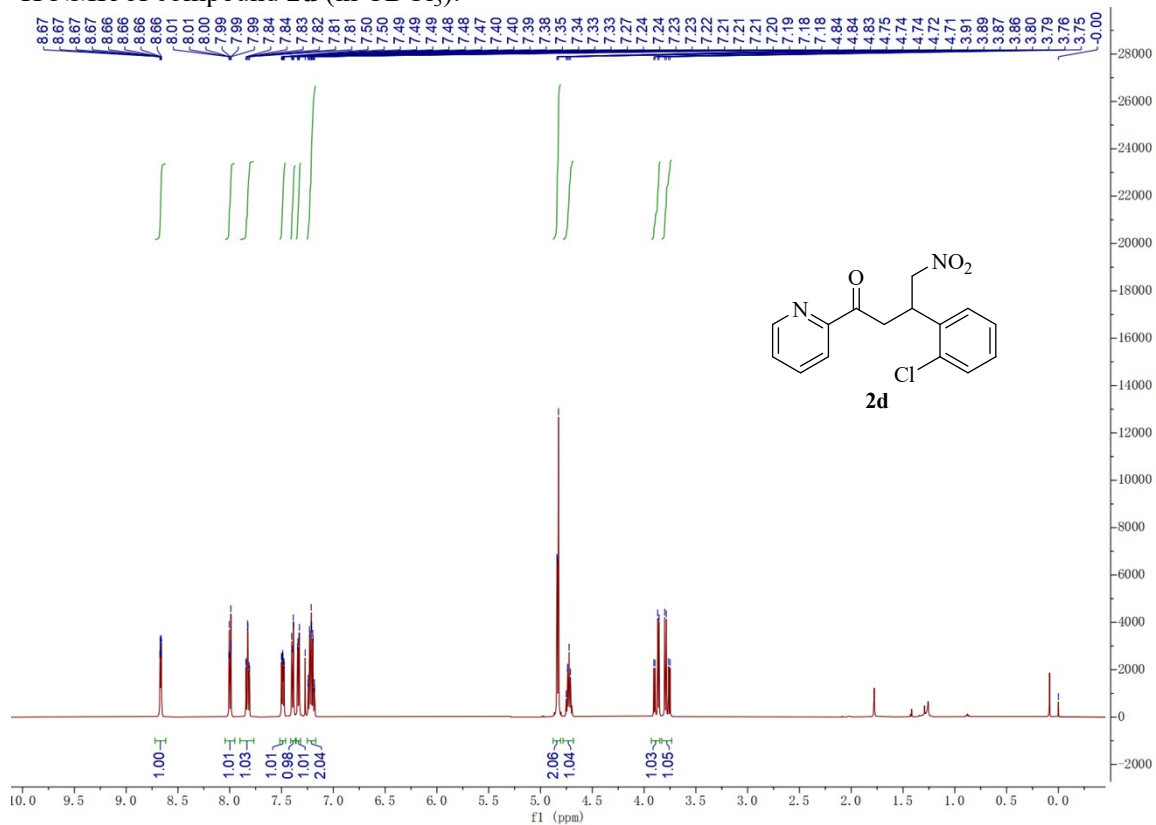

<sup>13</sup>C NMR of compound **2d** (in CDCl<sub>3</sub>):

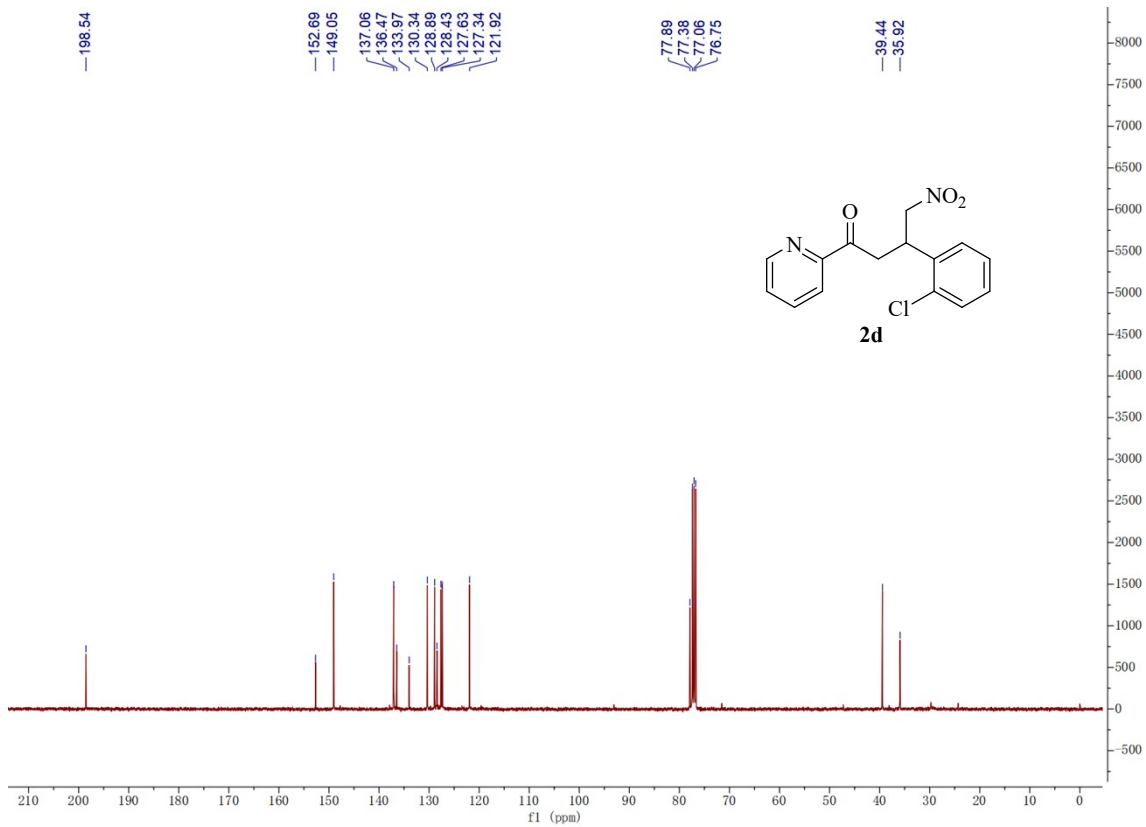

$^1\text{H}$  NMR of compound **2e** (in  $\text{CDCl}_3$ ):

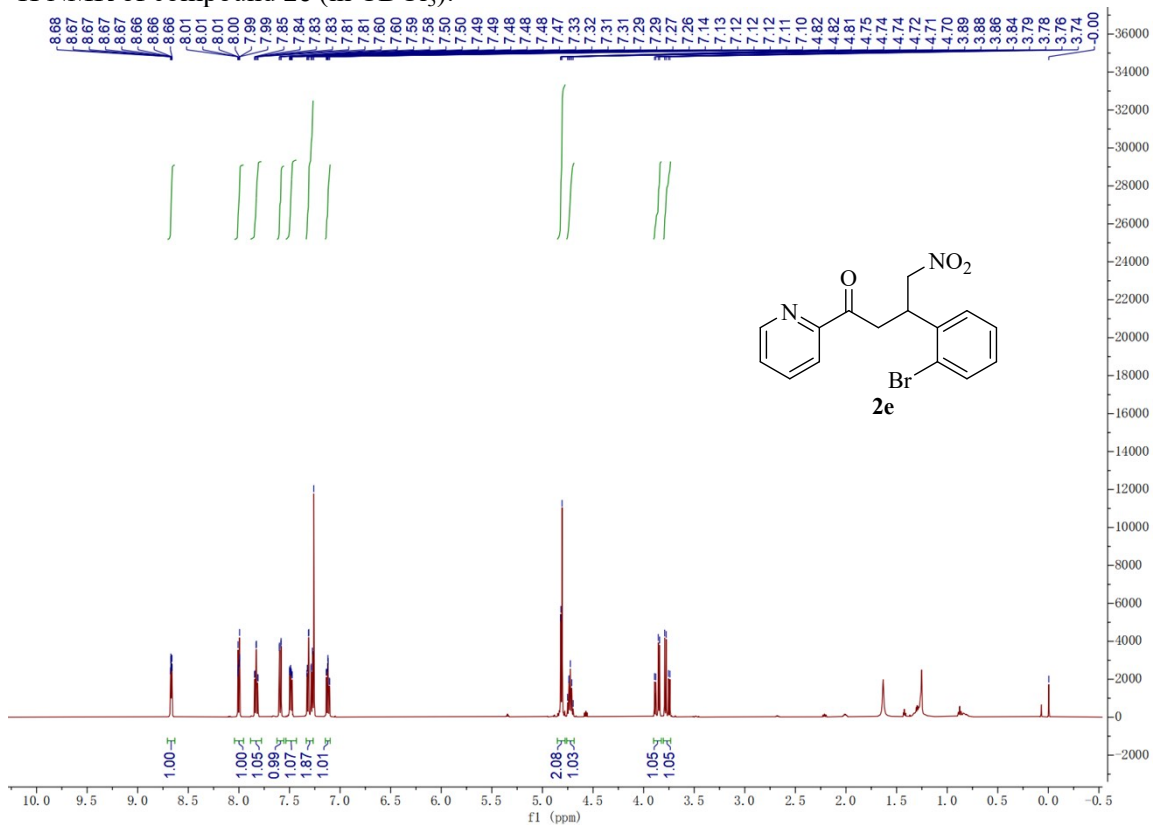

$^{13}\text{C}$  NMR of compound **2e** (in  $\text{CDCl}_3$ ):

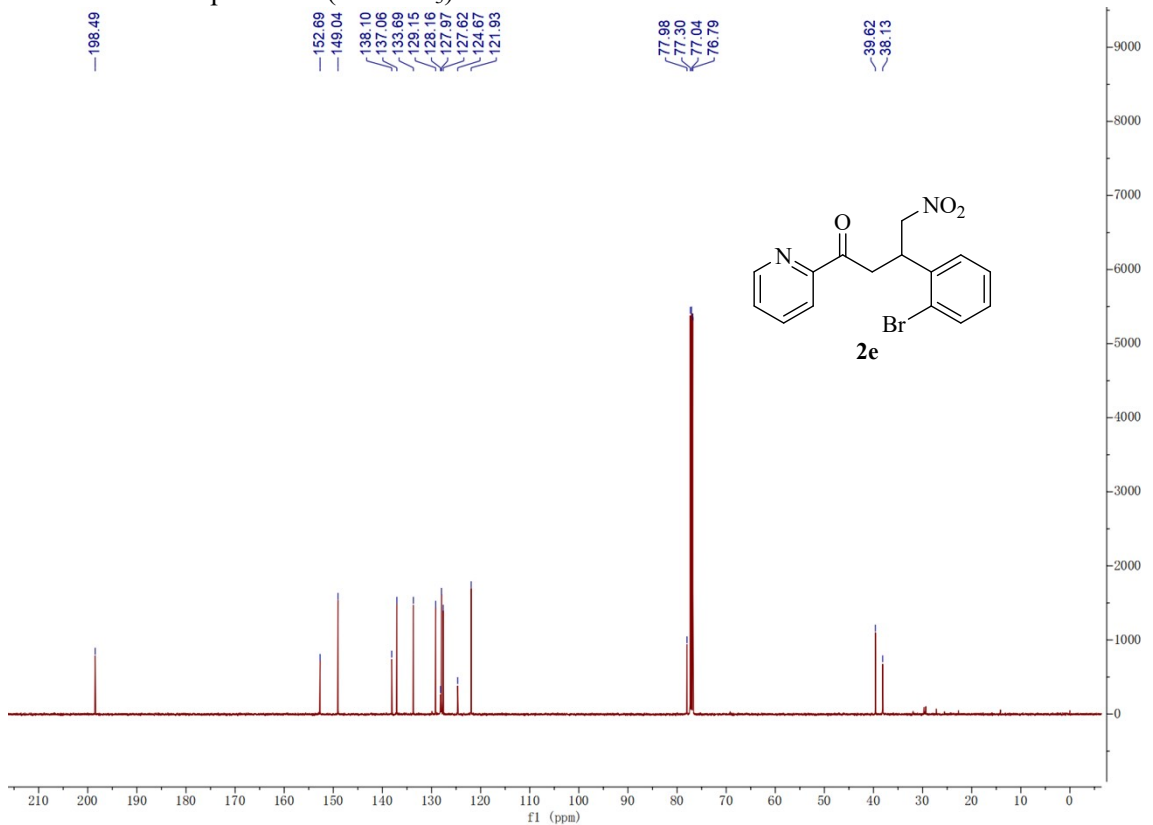

<sup>1</sup>H NMR of compound **2f** (in CDCl<sub>3</sub>):

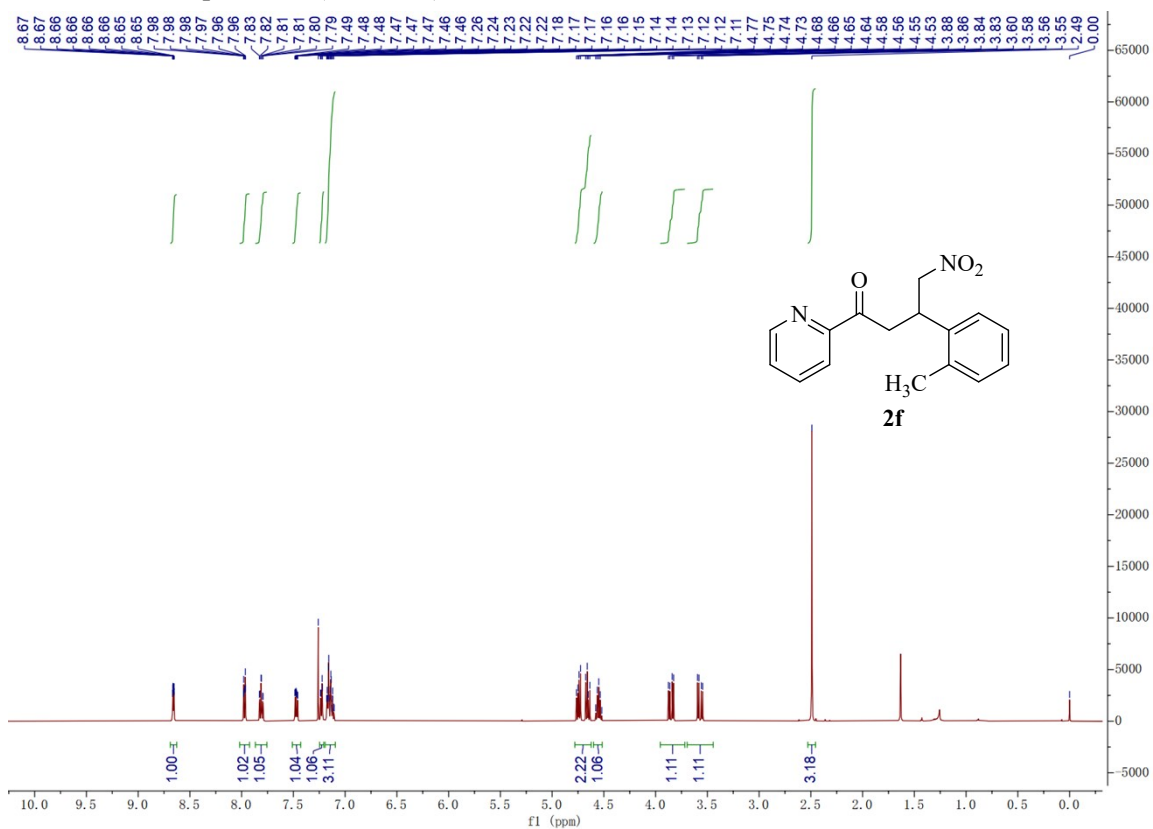

<sup>13</sup>C NMR of compound **2f** (in CDCl<sub>3</sub>):

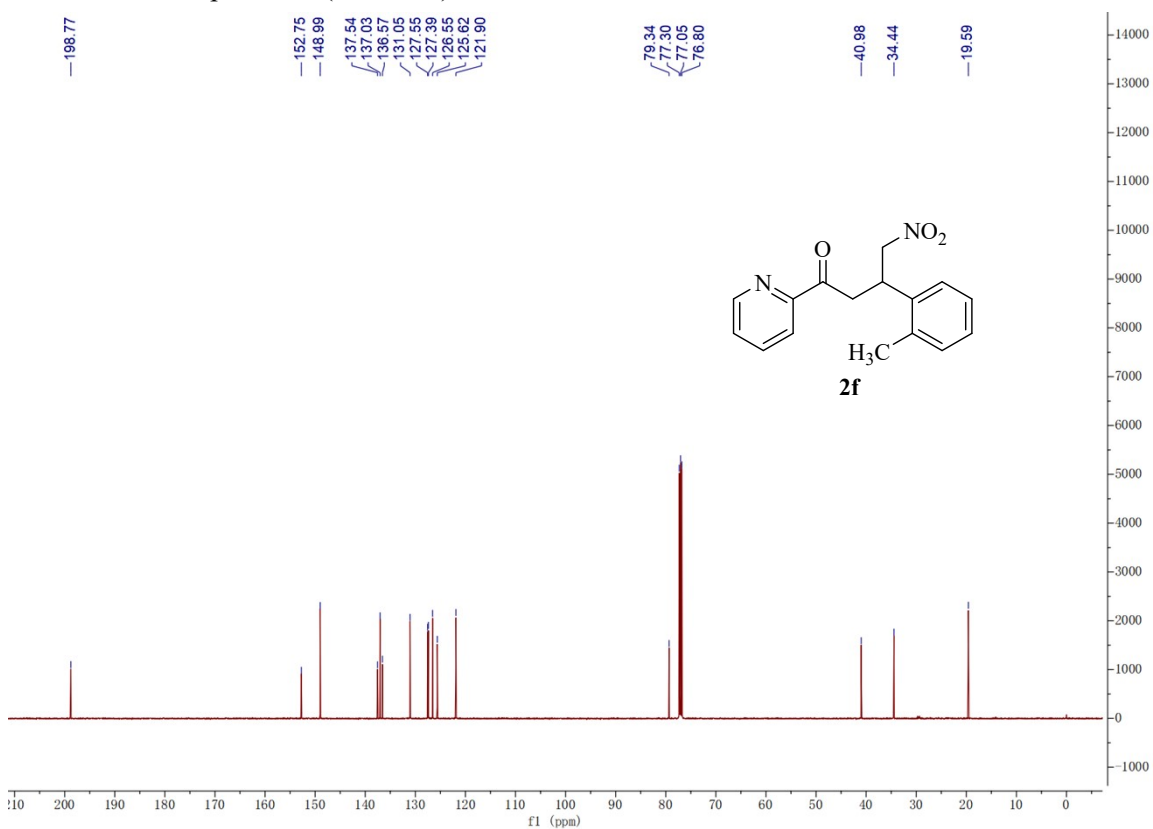



$^1\text{H}$  NMR of compound **2g** (in  $\text{CDCl}_3$ ):

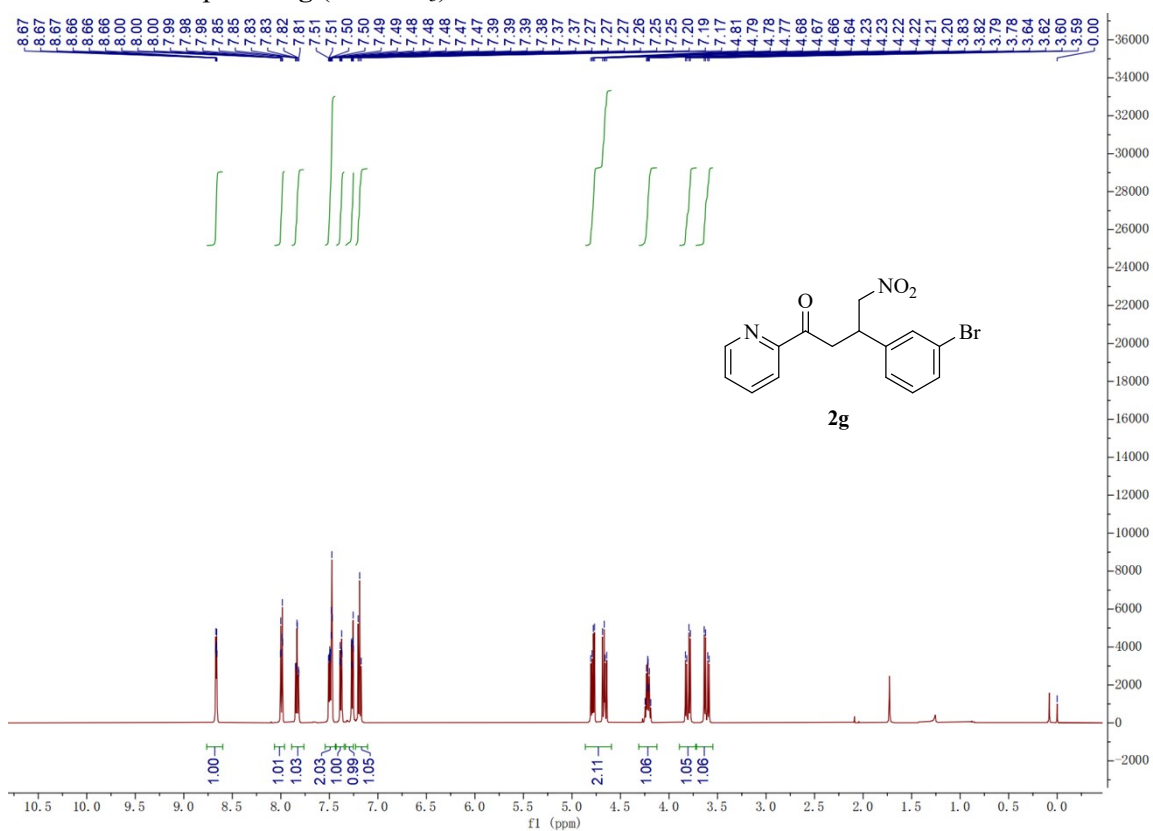

$^{13}\text{C}$  NMR of compound **2g** (in  $\text{CDCl}_3$ ):

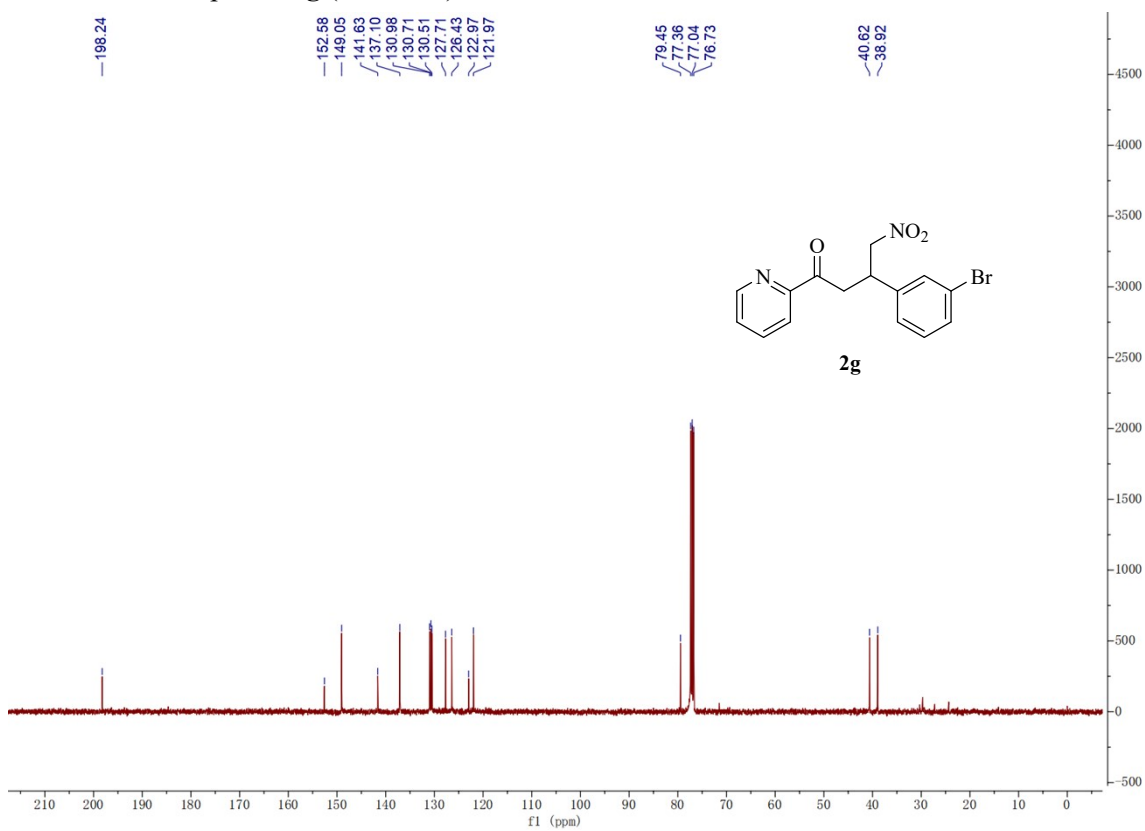

$^1\text{H}$  NMR of compound **2h** (in  $\text{CDCl}_3$ ):

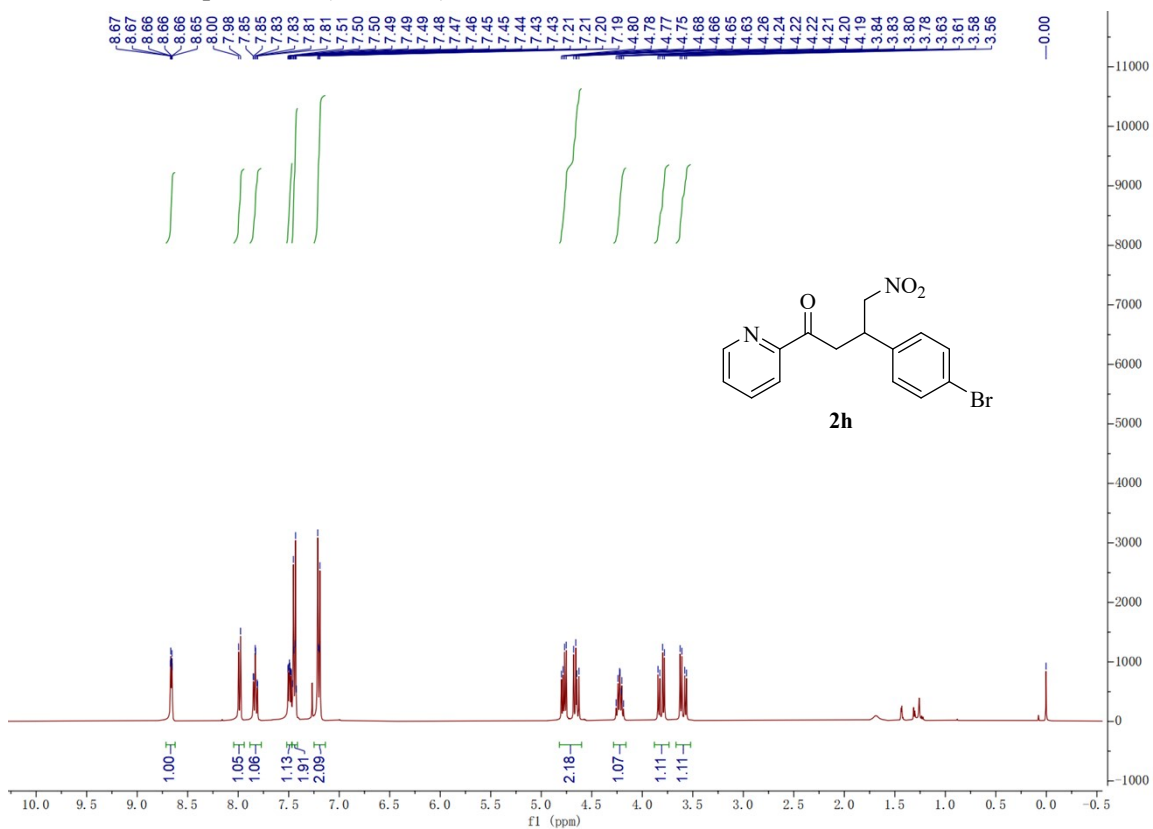

$^{13}\text{C}$  NMR of compound **2h** (in  $\text{CDCl}_3$ ):

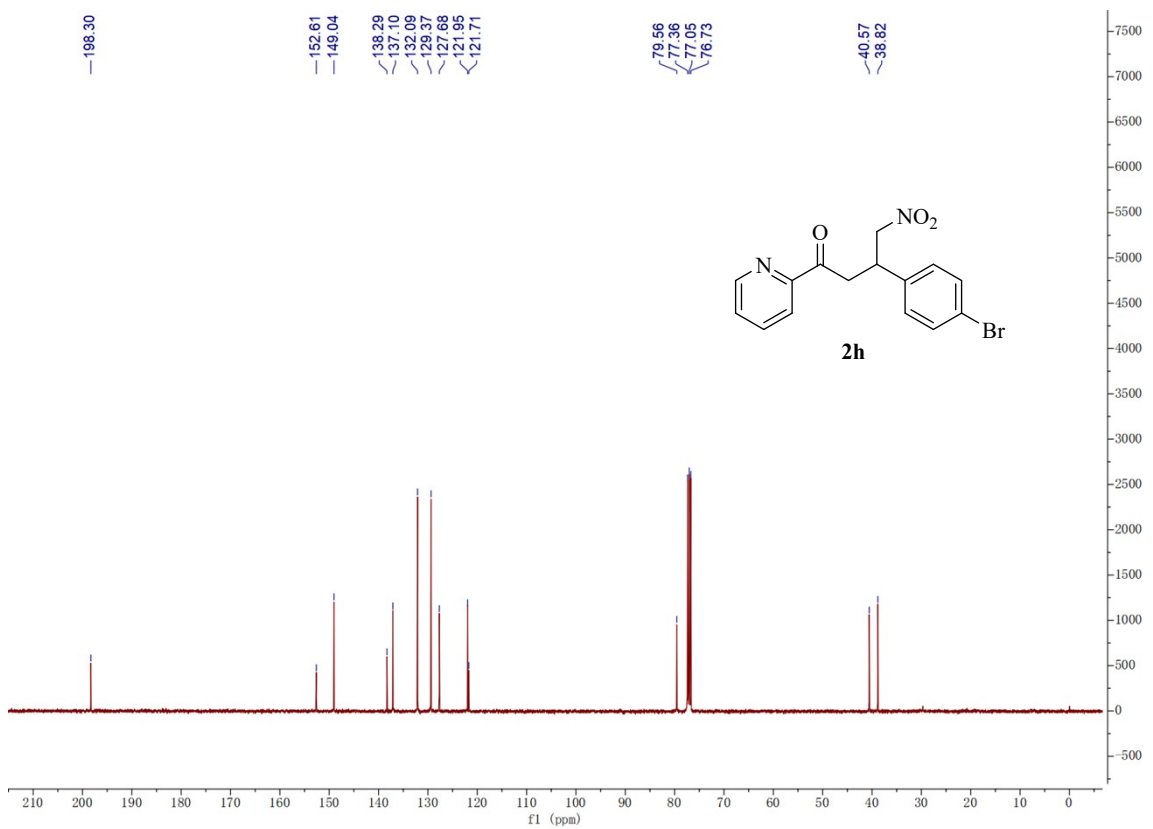

$^1\text{H}$  NMR of compound **2i** (in  $\text{CDCl}_3$ ):

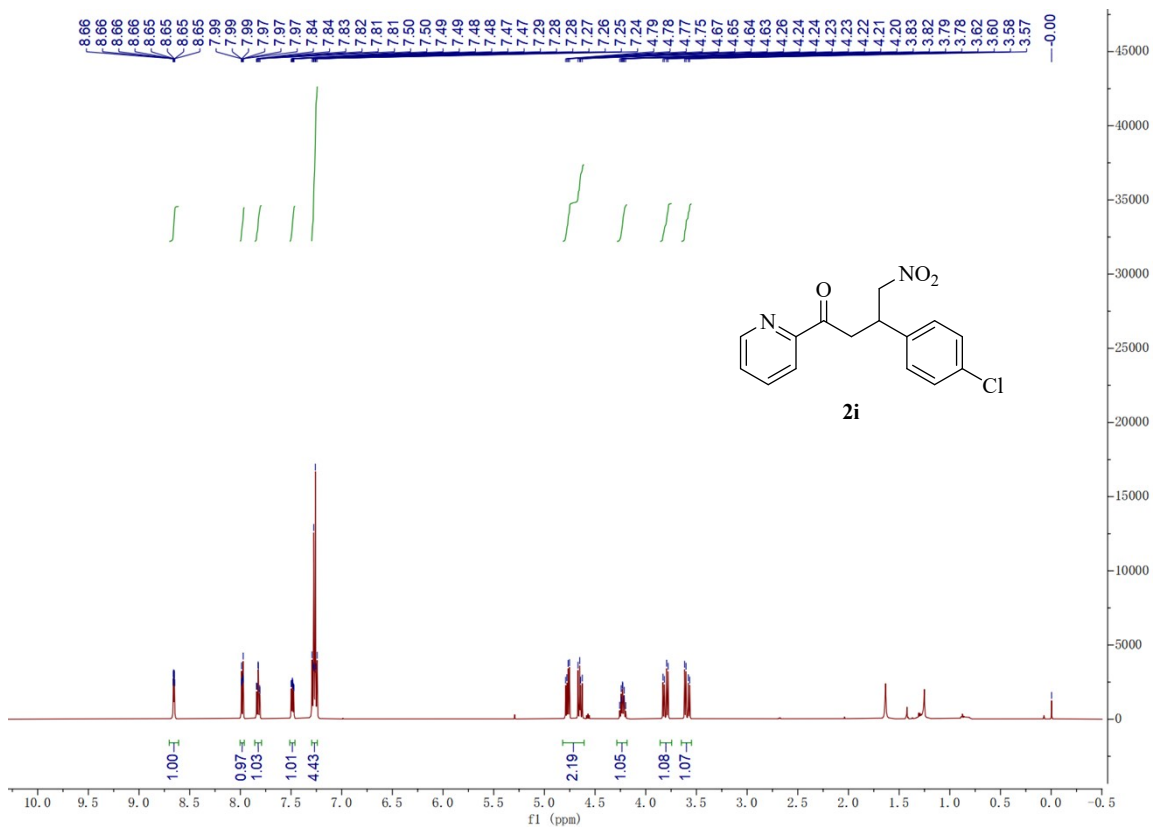

$^{13}\text{C}$  NMR of compound **2i** (in  $\text{CDCl}_3$ ):

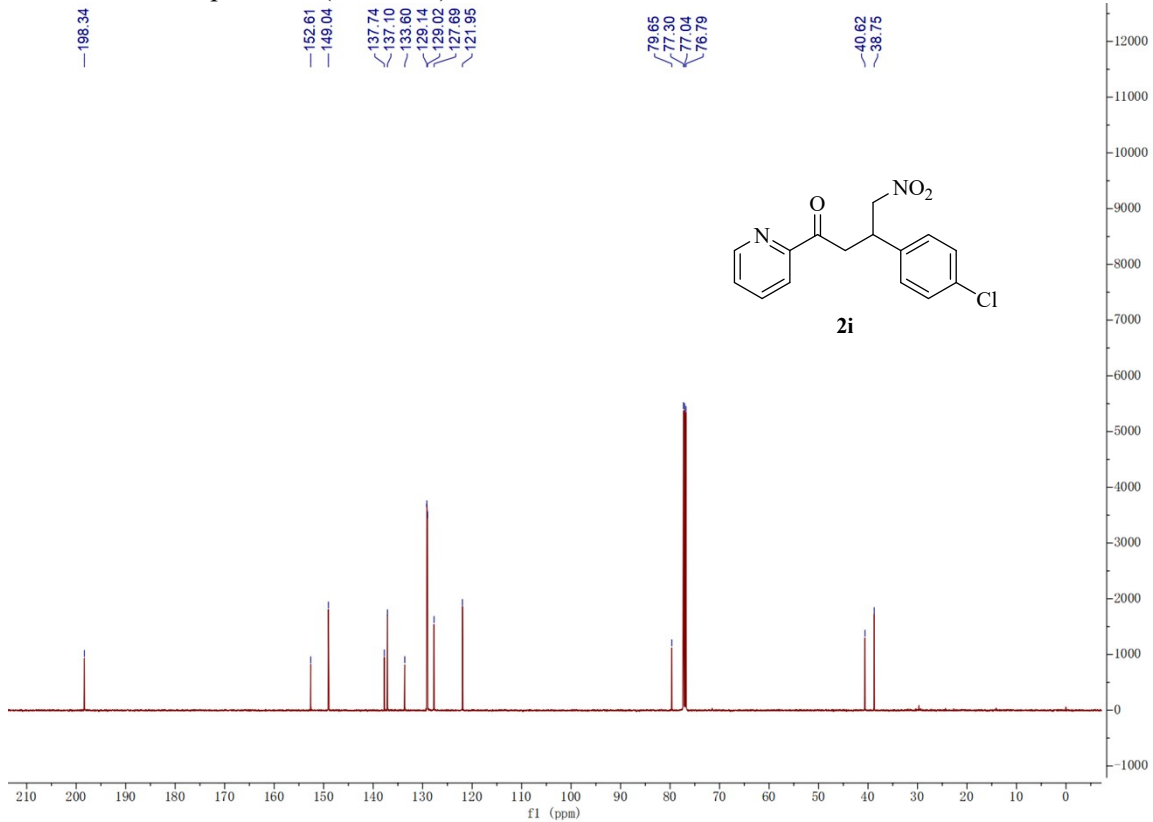

$^1\text{H}$  NMR of compound **2j** (in  $\text{CDCl}_3$ ):

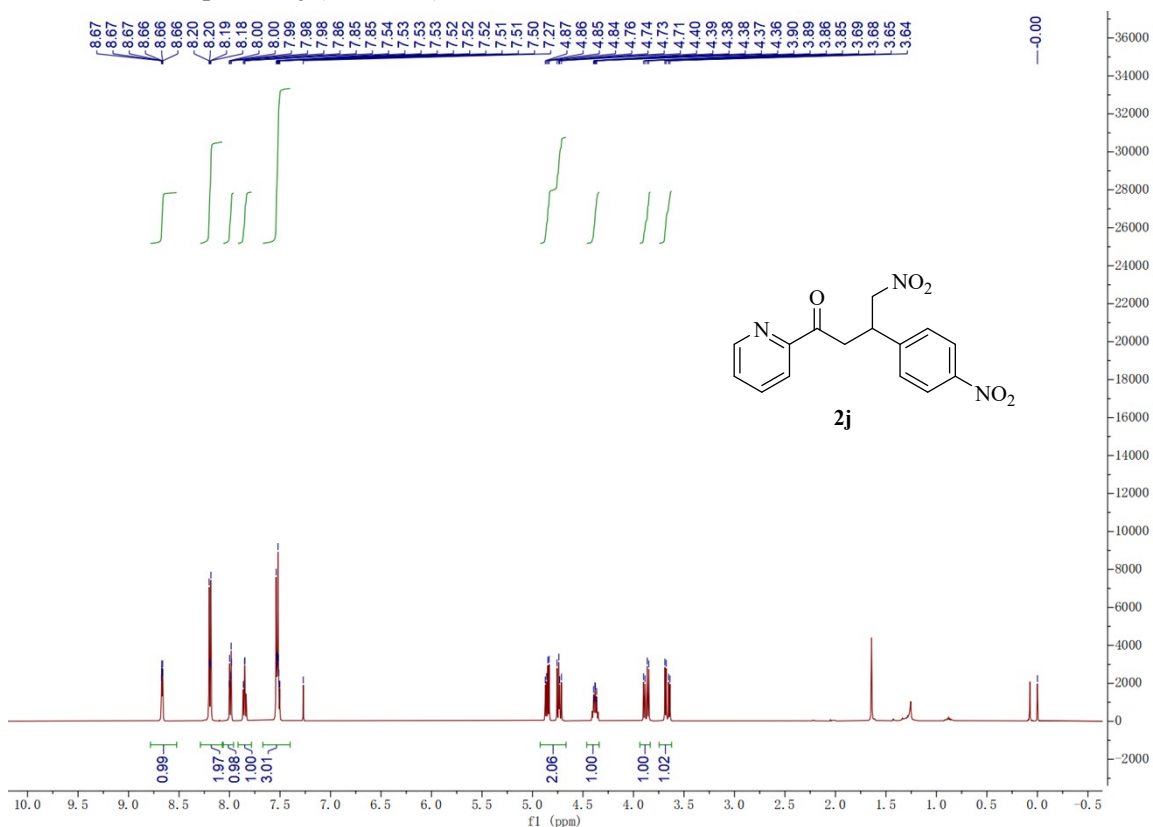

$^{13}\text{C}$  NMR of compound **2j** (in  $\text{CDCl}_3$ ):

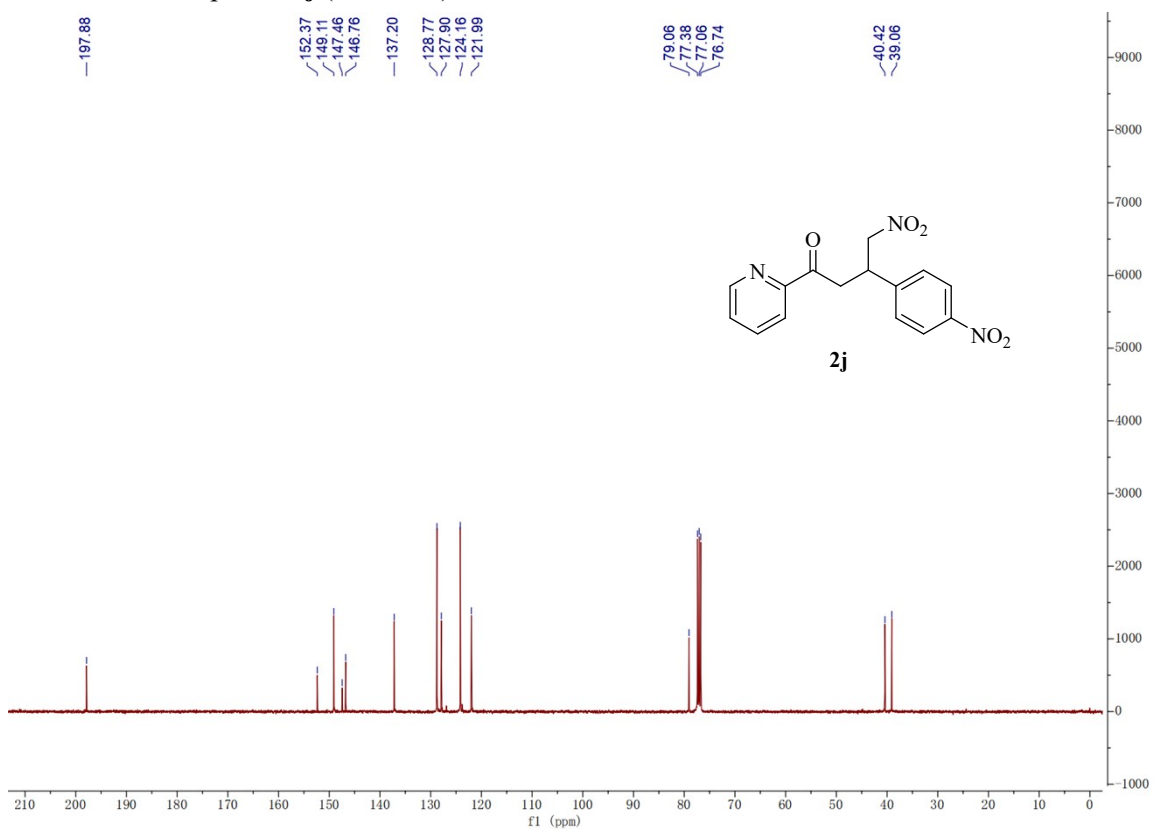

$^1\text{H}$  NMR of compound **2k** (in  $\text{CDCl}_3$ ):

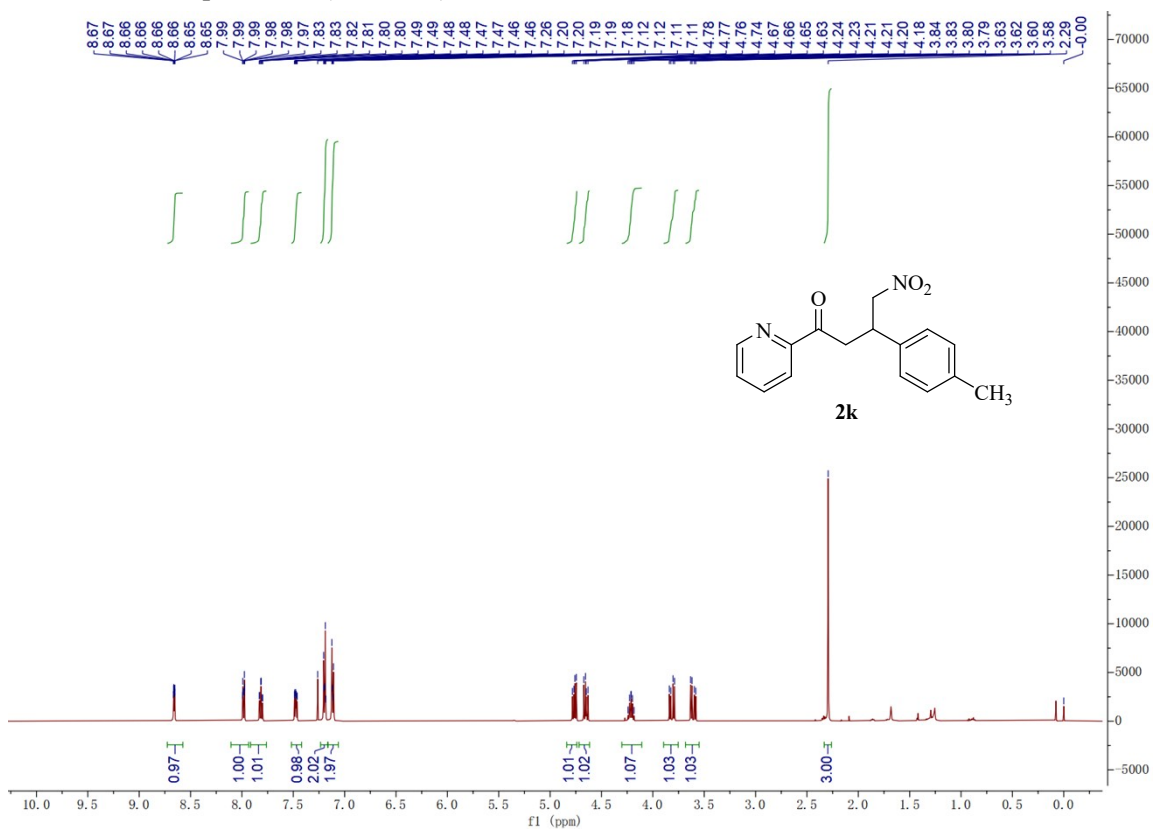

$^{13}\text{C}$  NMR of compound **2k** (in  $\text{CDCl}_3$ ):

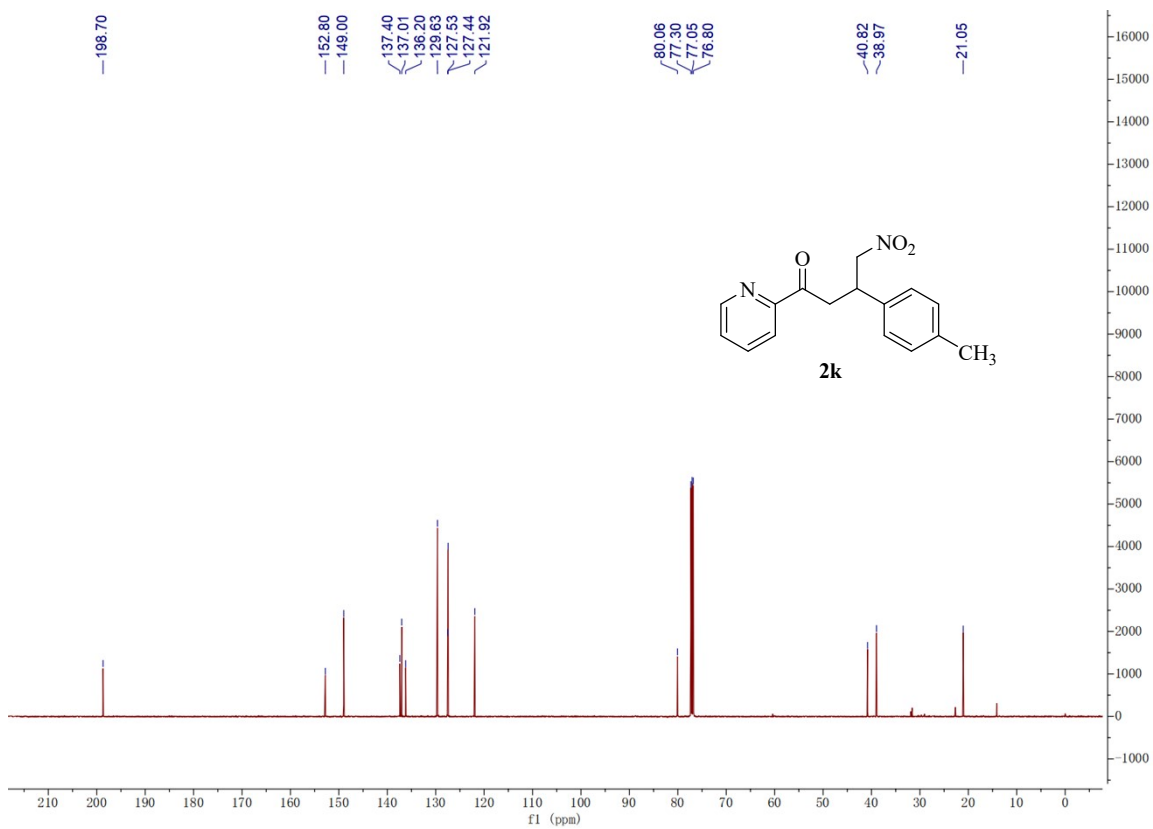

<sup>1</sup>H NMR of compound **21** (in CDCl<sub>3</sub>):

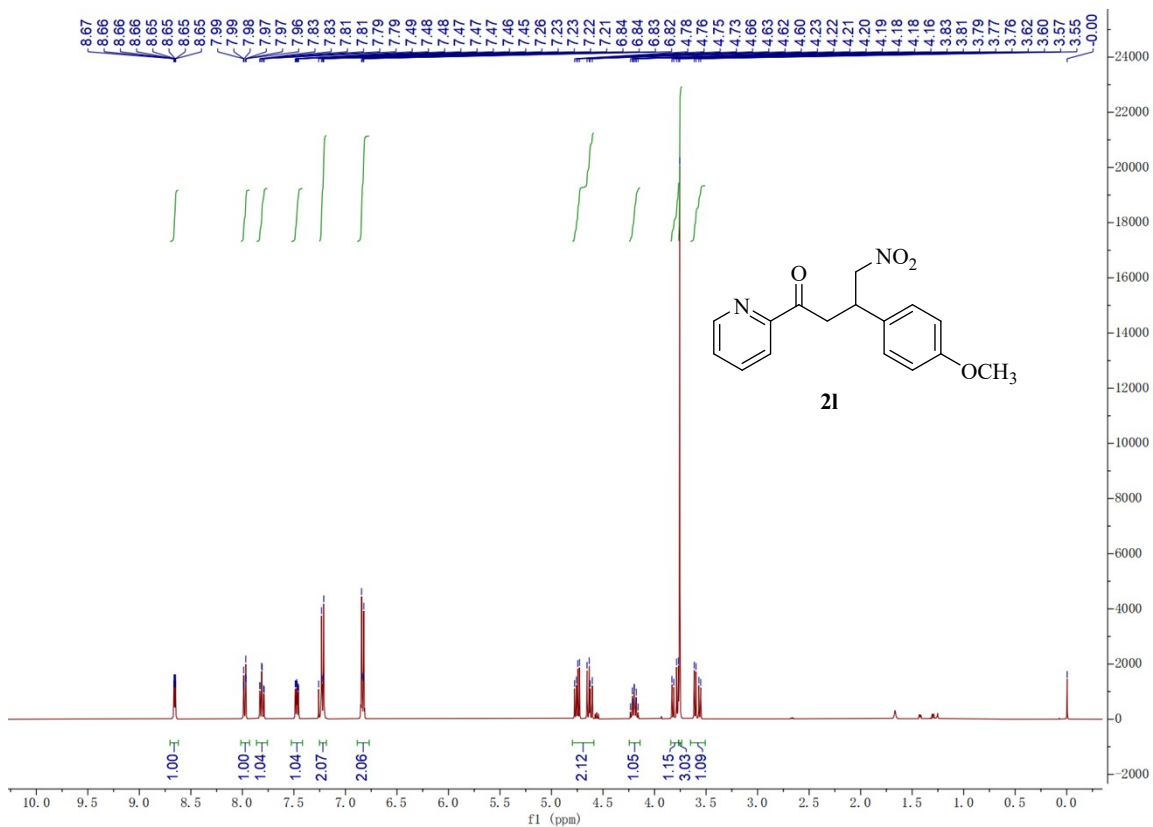

<sup>13</sup>C NMR of compound **21** (in CDCl<sub>3</sub>):

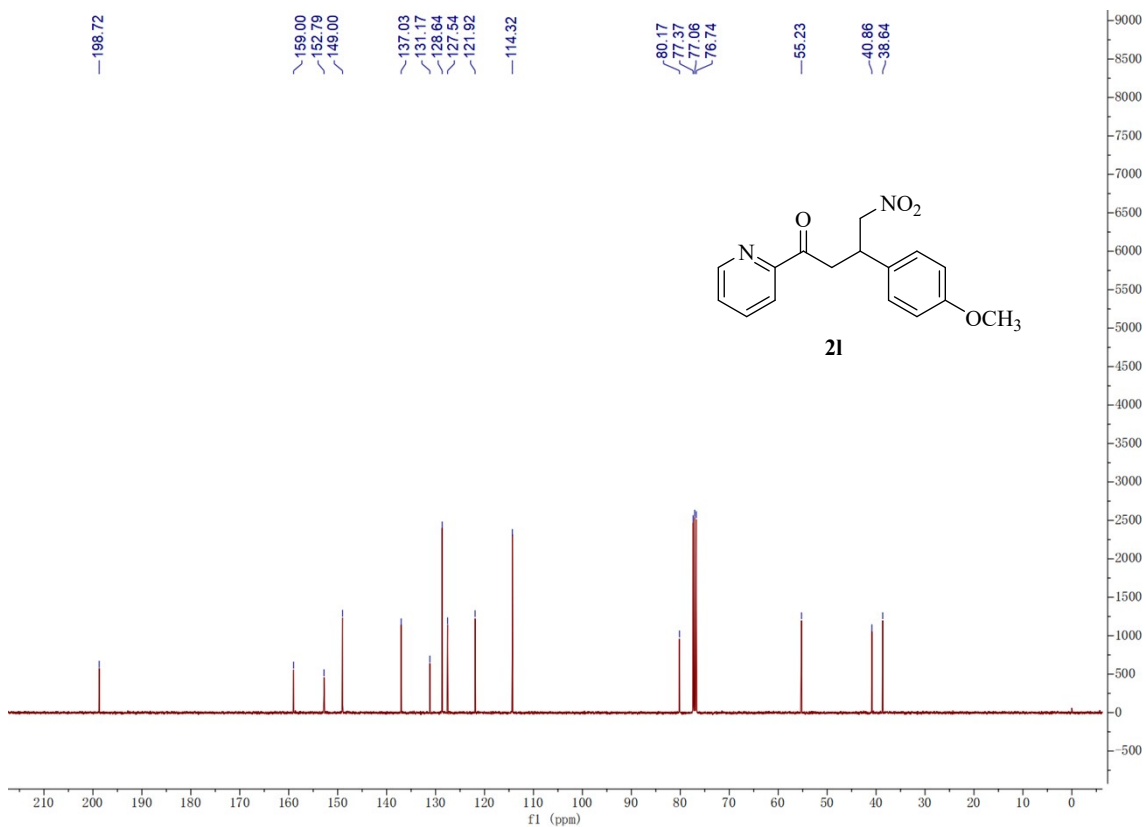

$^1\text{H}$  NMR of compound **2m** (in  $\text{CDCl}_3$ ):

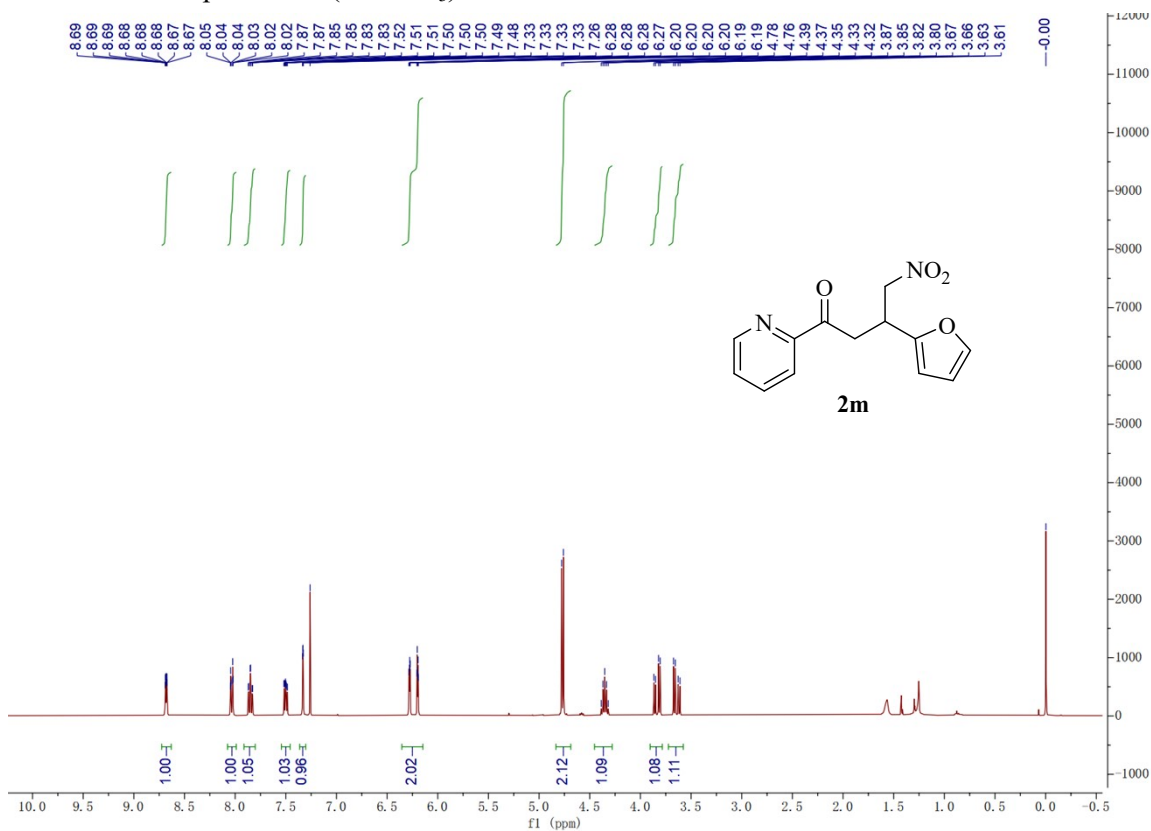

$^{13}\text{C}$  NMR of compound **2m** (in  $\text{CDCl}_3$ ):

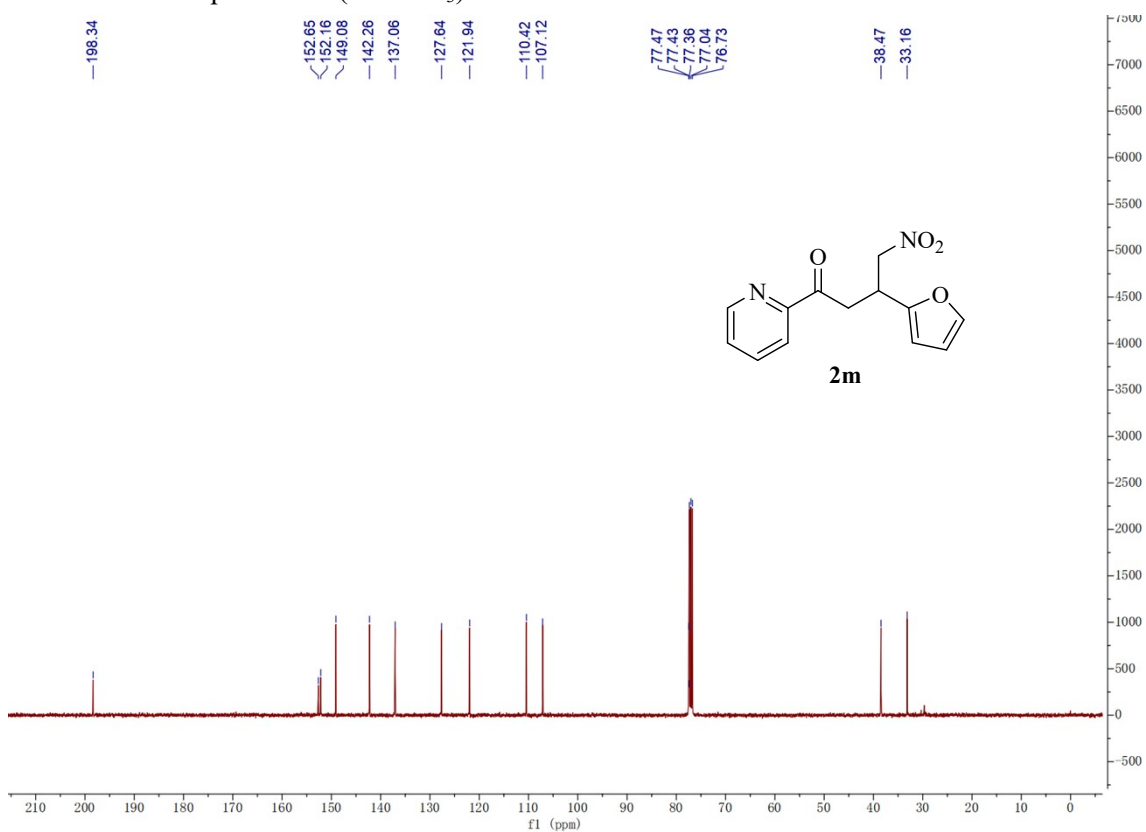

$^1\text{H}$  NMR of compound **2n** (in  $\text{CDCl}_3$ ):

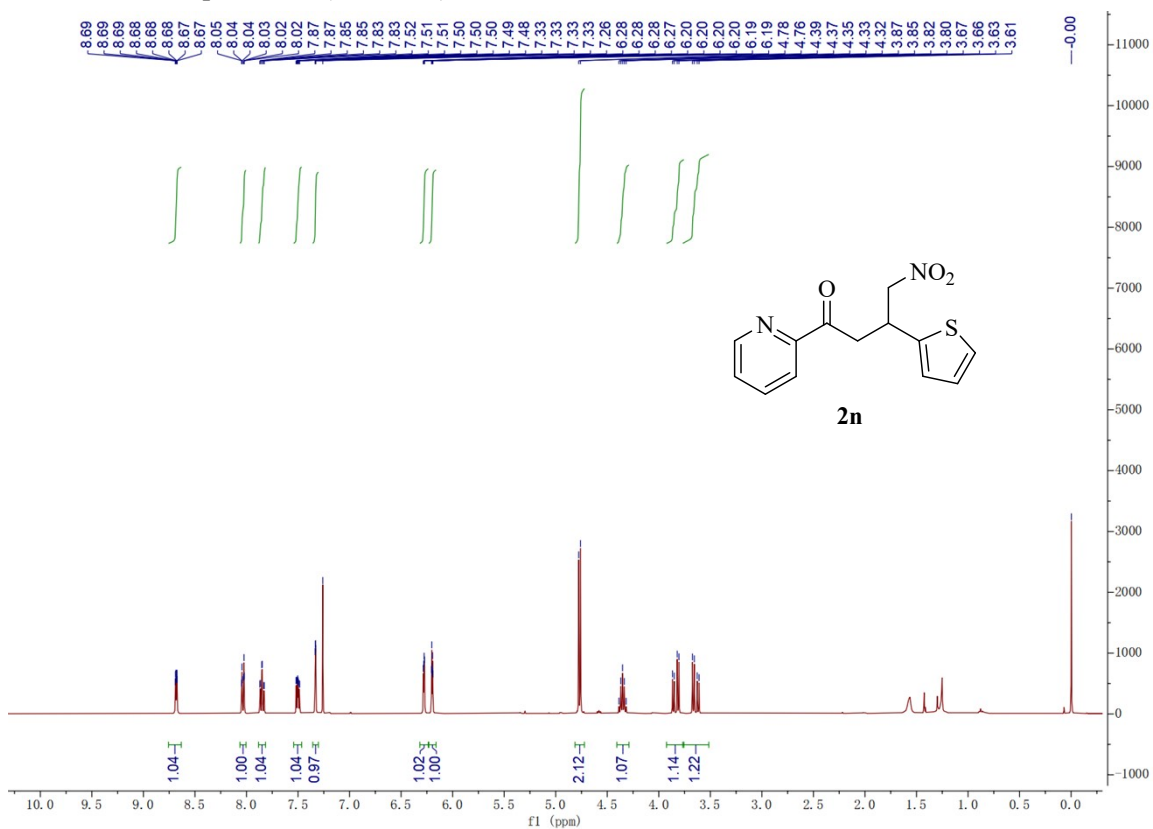

$^{13}\text{C}$  NMR of compound **2n** (in  $\text{CDCl}_3$ ):

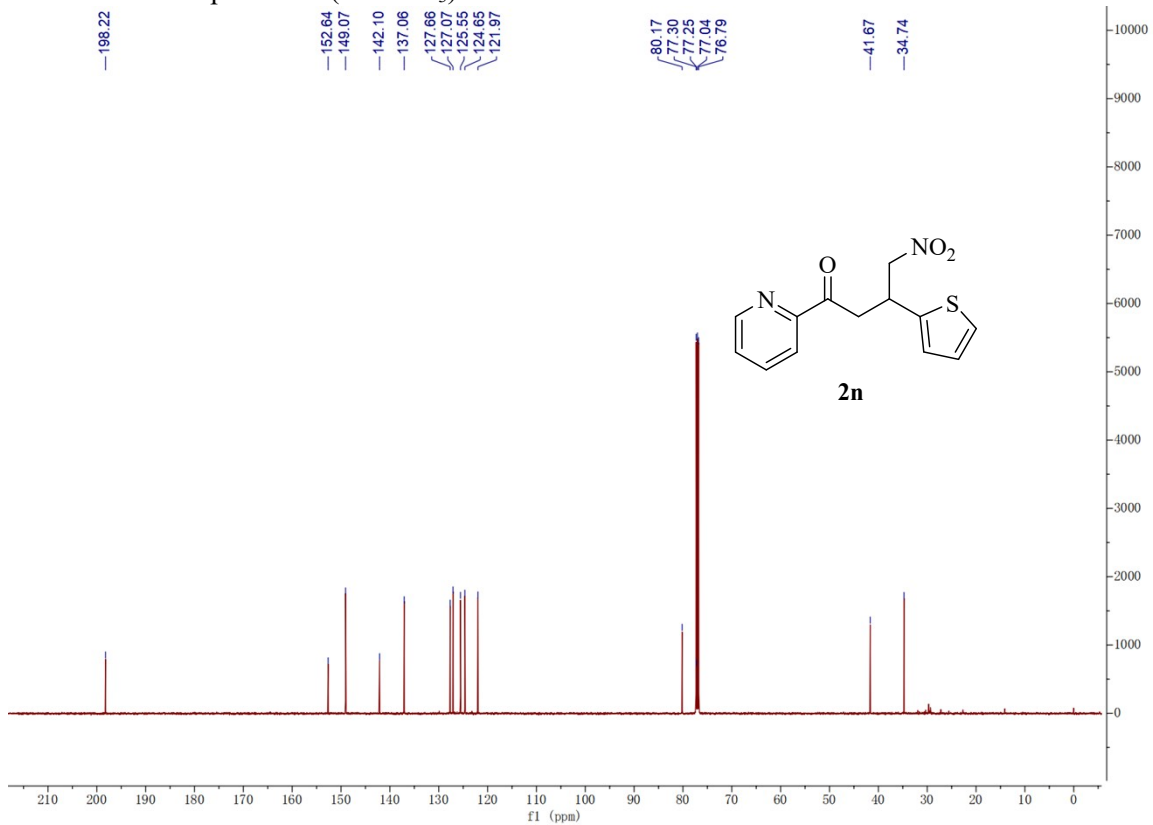



$^1\text{H}$  NMR of compound **2o** (in  $\text{CDCl}_3$ ):

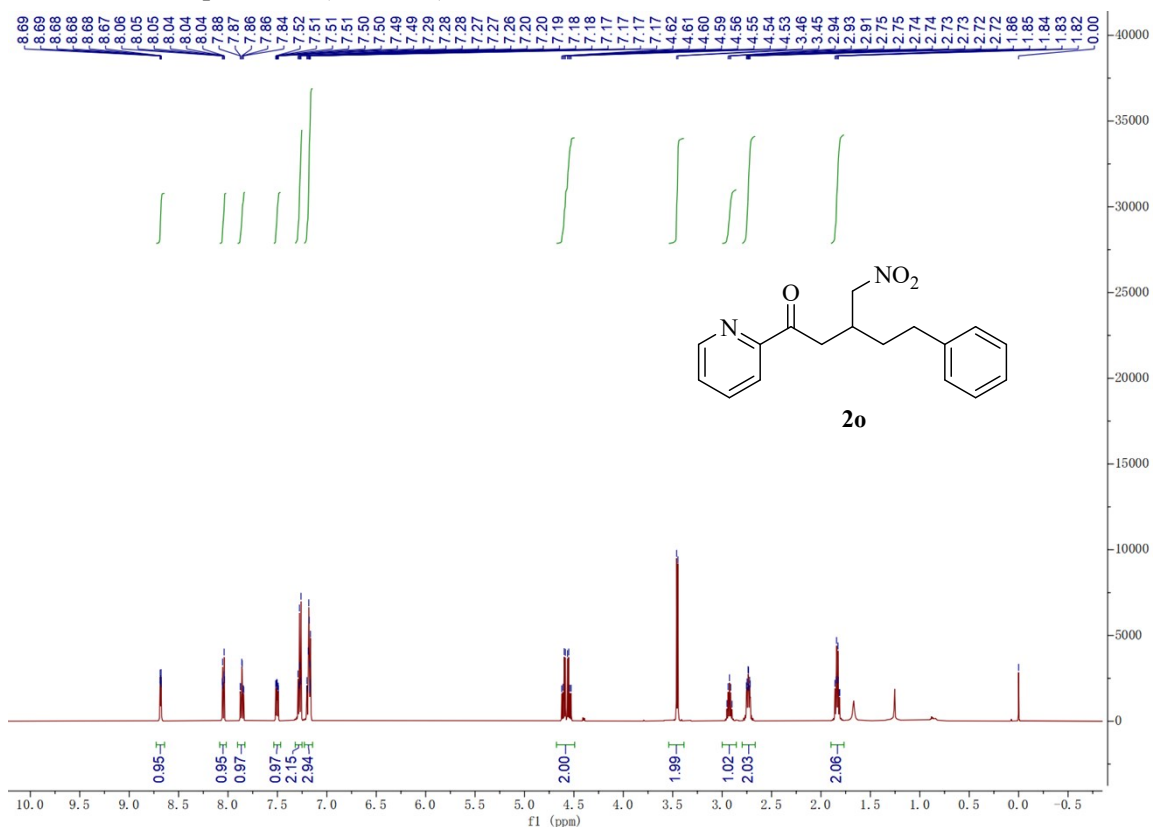

$^{13}\text{C}$  NMR of compound **2o** (in  $\text{CDCl}_3$ ):

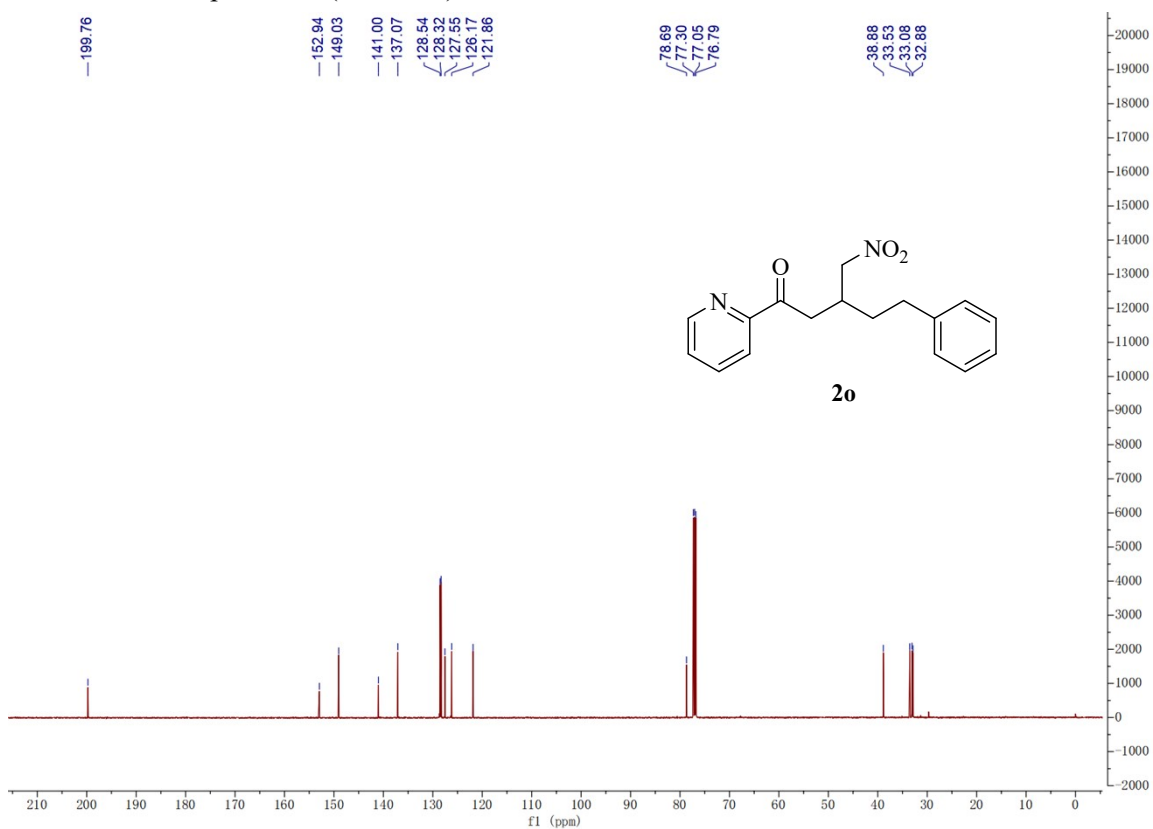

<sup>1</sup>H NMR of compound **2p** (in CDCl<sub>3</sub>):

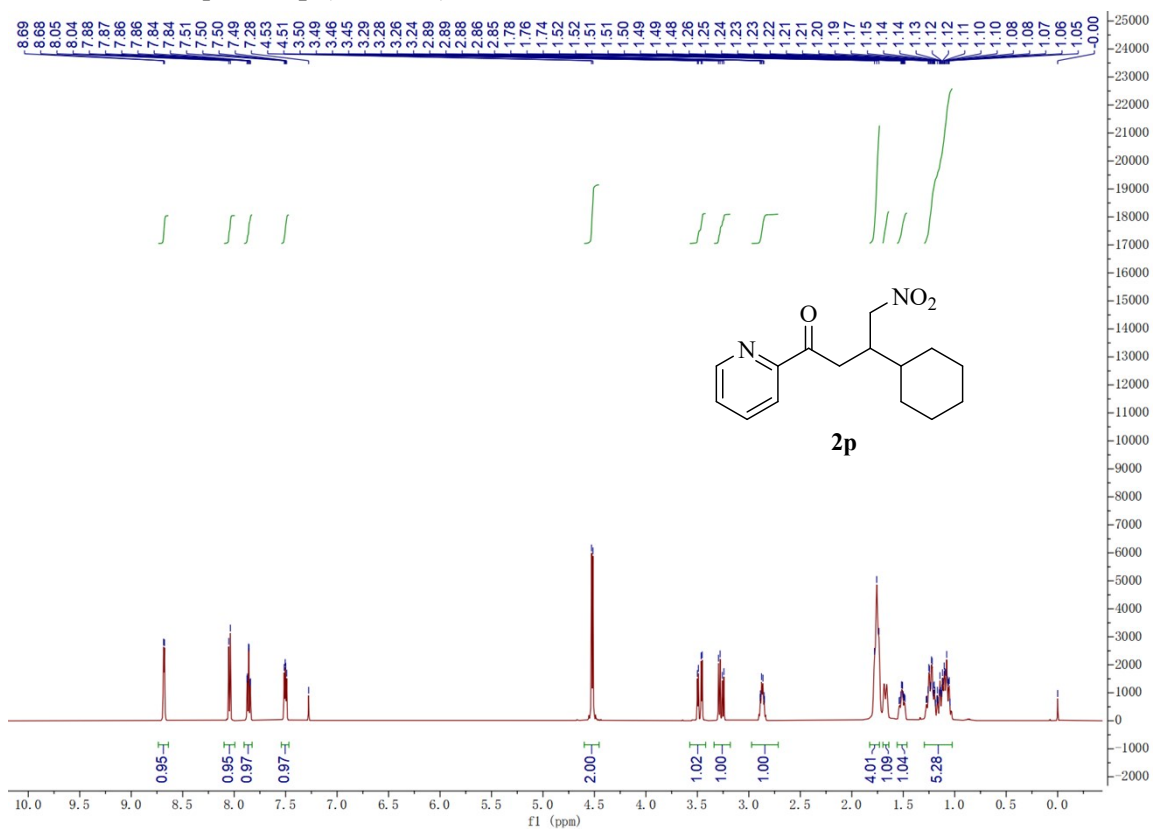

<sup>1</sup>H NMR of compound **2q** (in CDCl<sub>3</sub>):

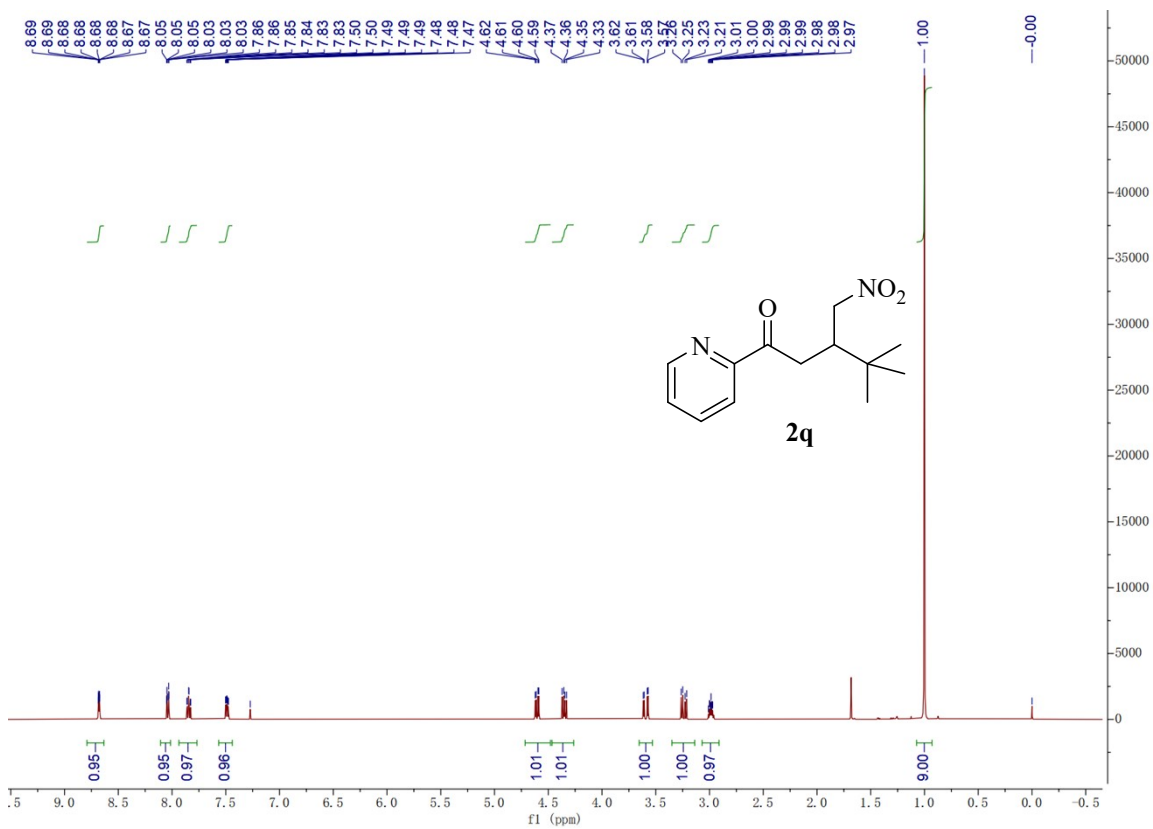

<sup>1</sup>H NMR of compound **2r** (in CDCl<sub>3</sub>):

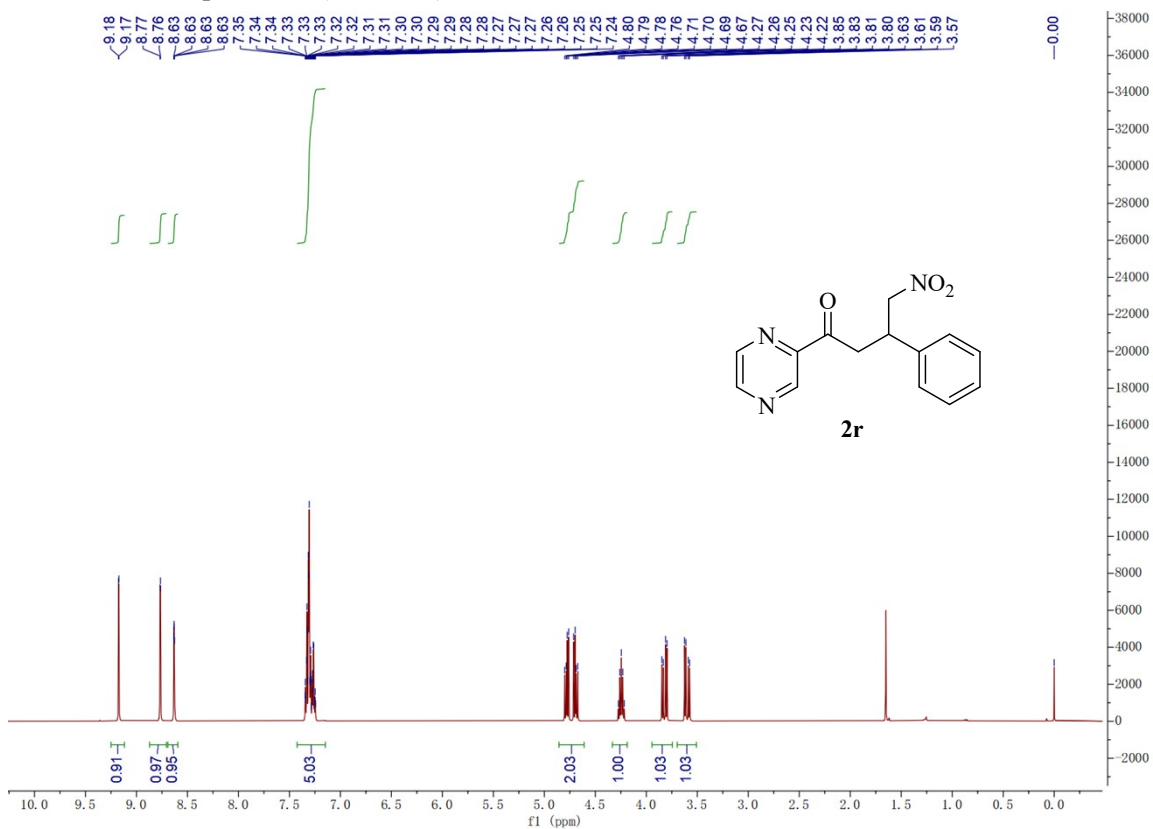

<sup>13</sup>C NMR of compound **2r** (in CDCl<sub>3</sub>):

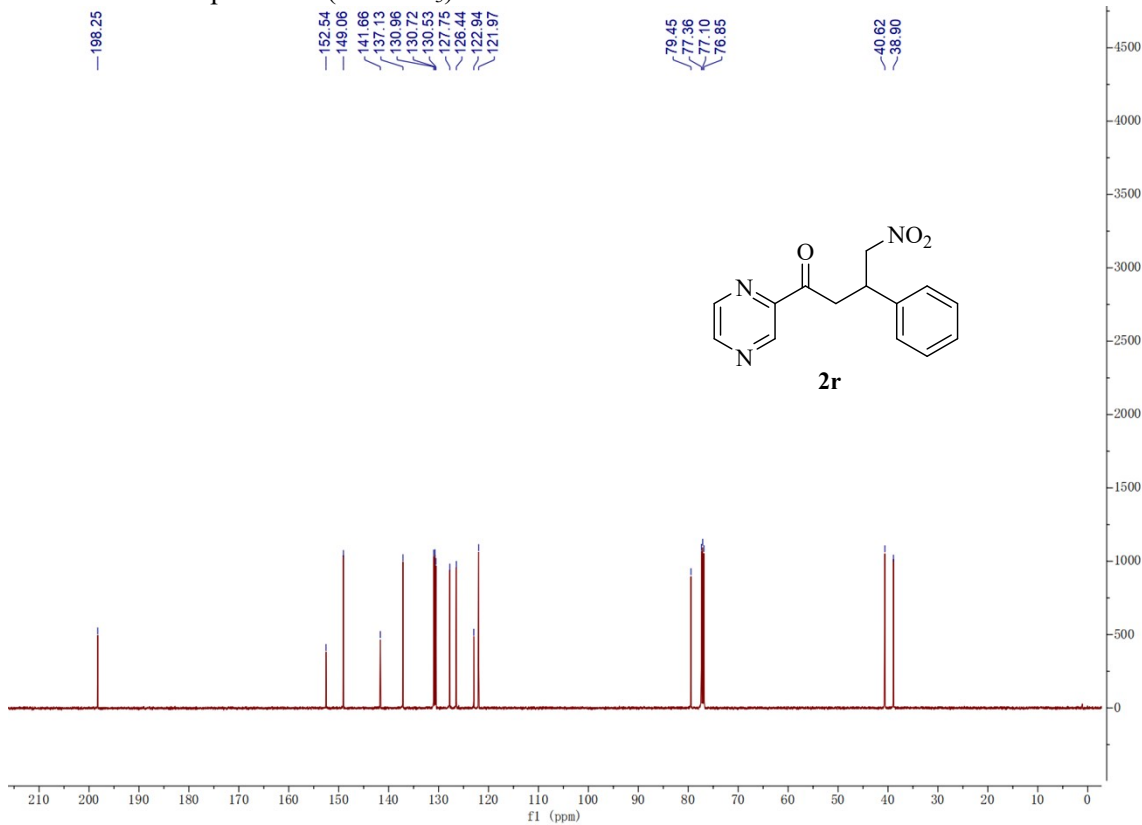

<sup>1</sup>H NMR of compound **2s** (in CDCl<sub>3</sub>):

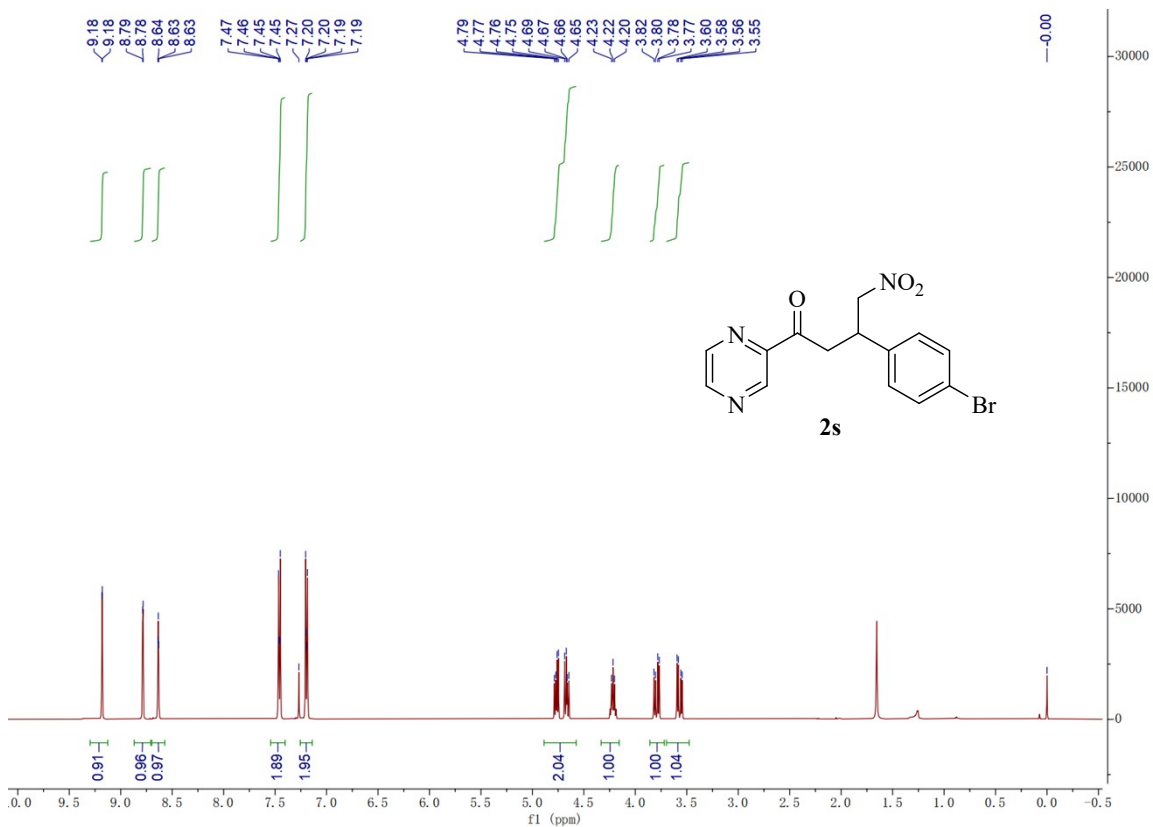

<sup>13</sup>C NMR of compound **2s** (in CDCl<sub>3</sub>):

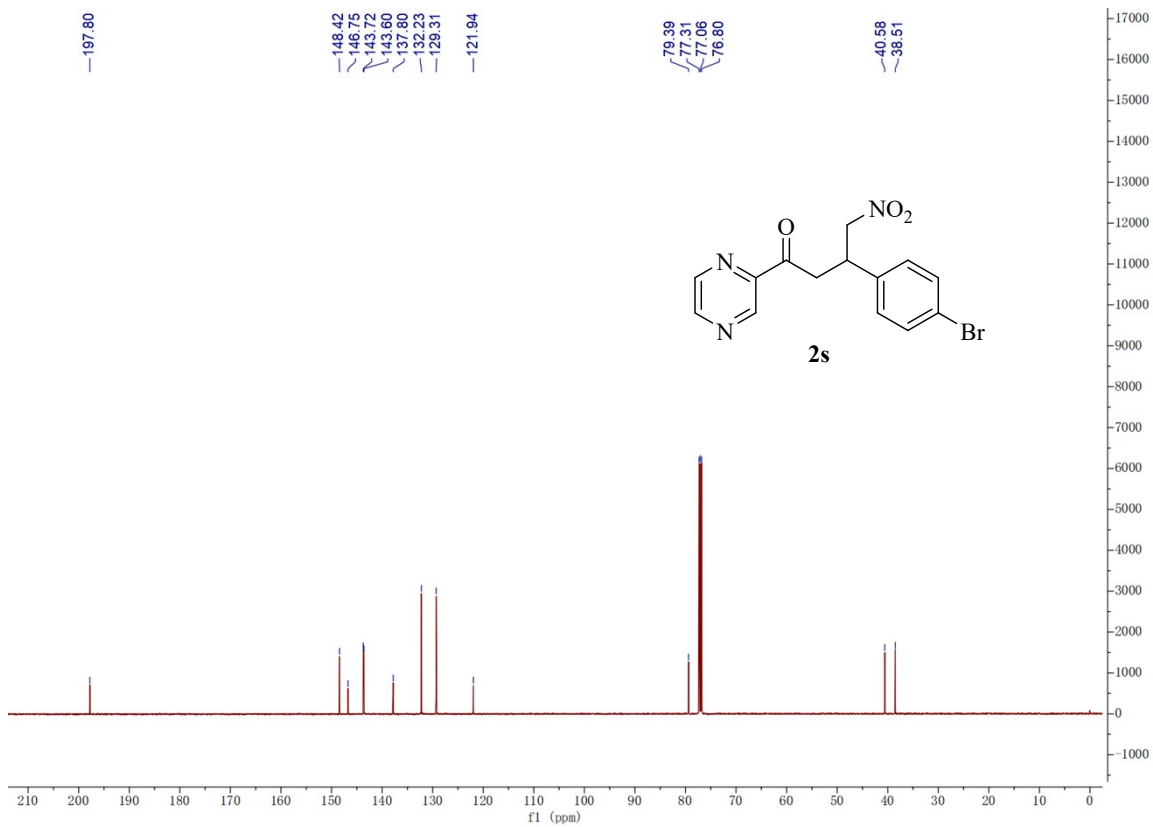

$^1\text{H}$  NMR of compound **2t** (in  $\text{CDCl}_3$ ):

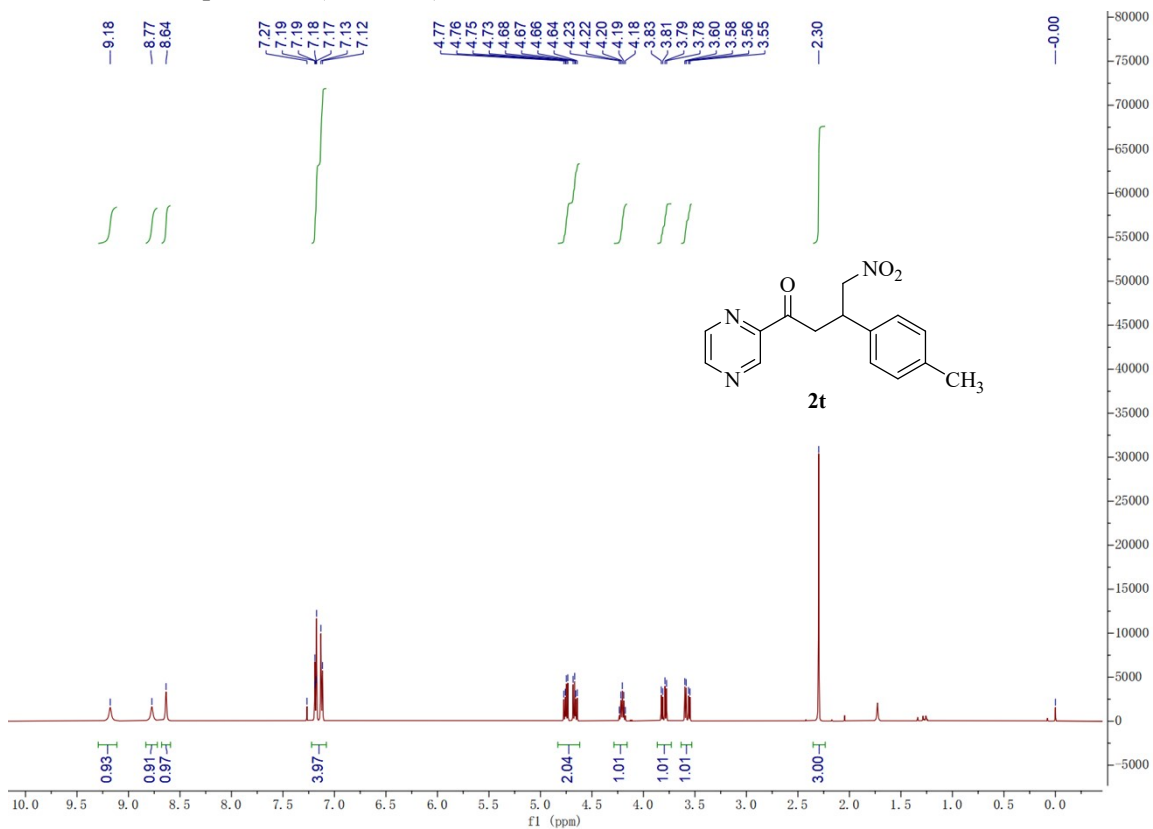

$^{13}\text{C}$  NMR of compound **2t** (in  $\text{CDCl}_3$ ):

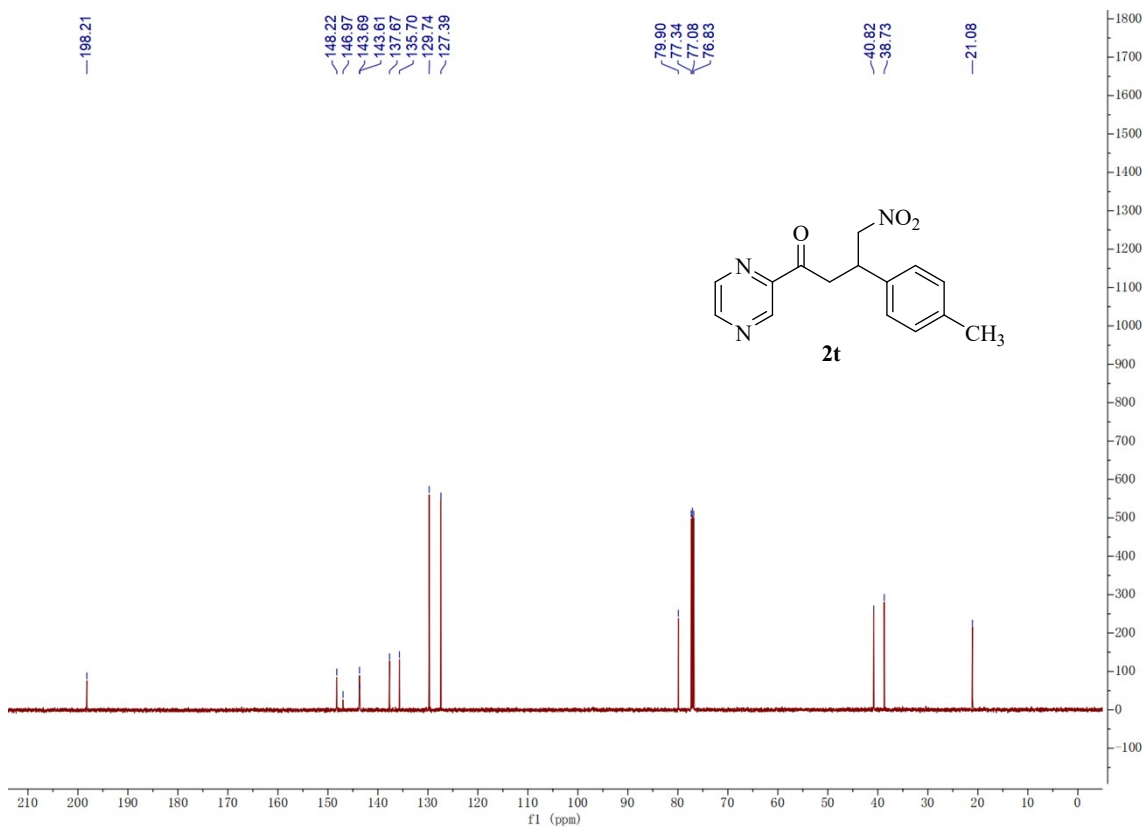

$^1\text{H}$  NMR of compound **2u** (in  $\text{CDCl}_3$ ):

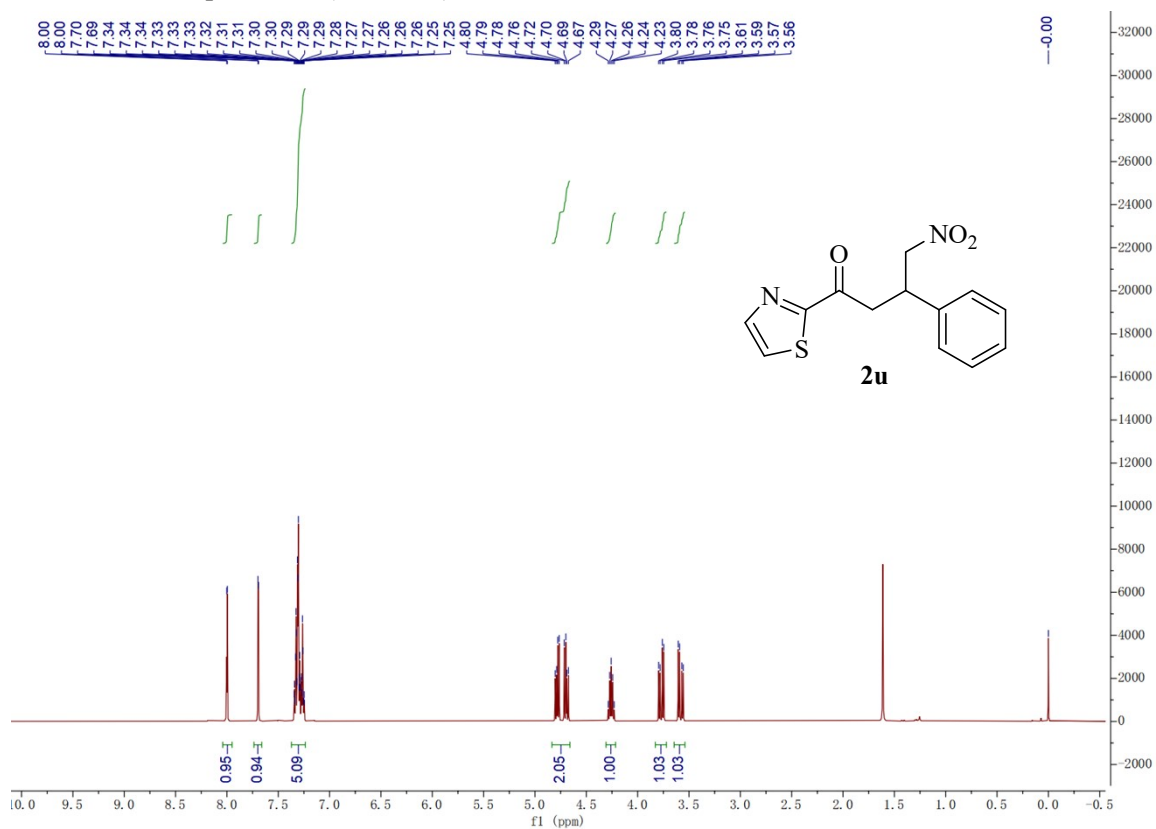

$^{13}\text{C}$  NMR of compound **2u** (in  $\text{CDCl}_3$ ):

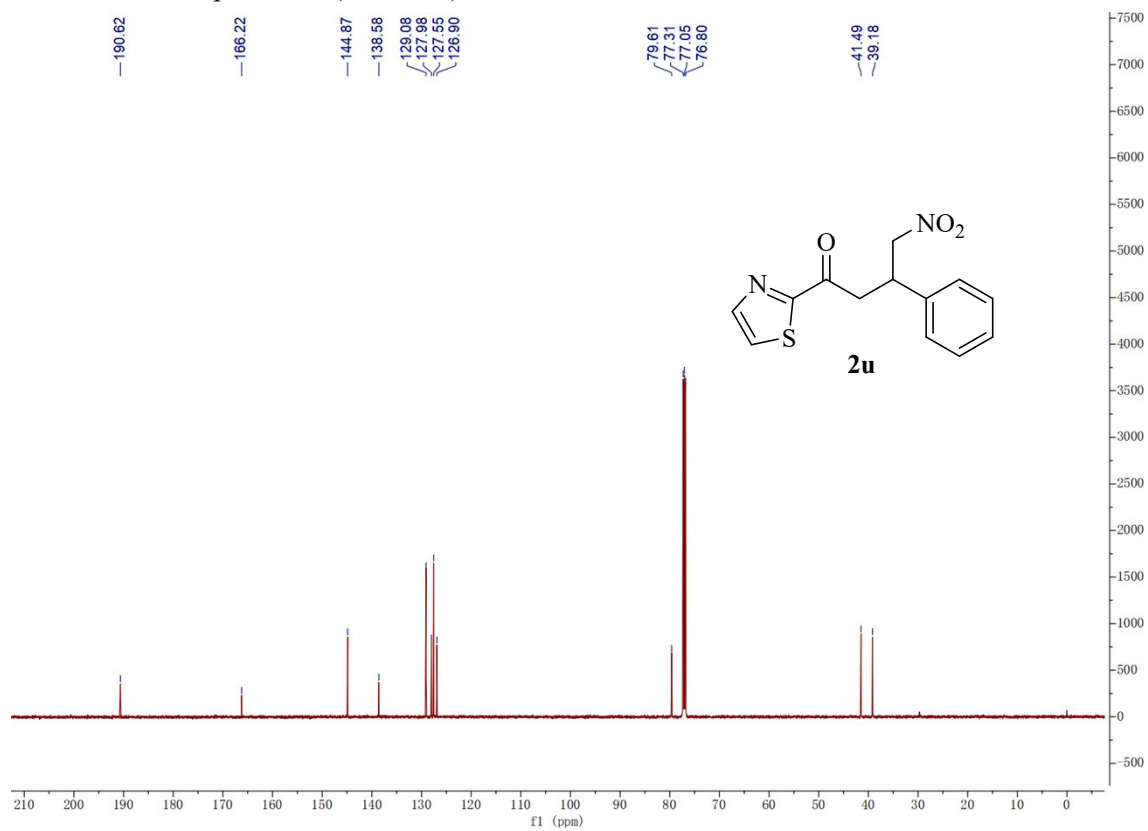

$^1\text{H}$  NMR of compound **2v** (in  $\text{CDCl}_3$ ):

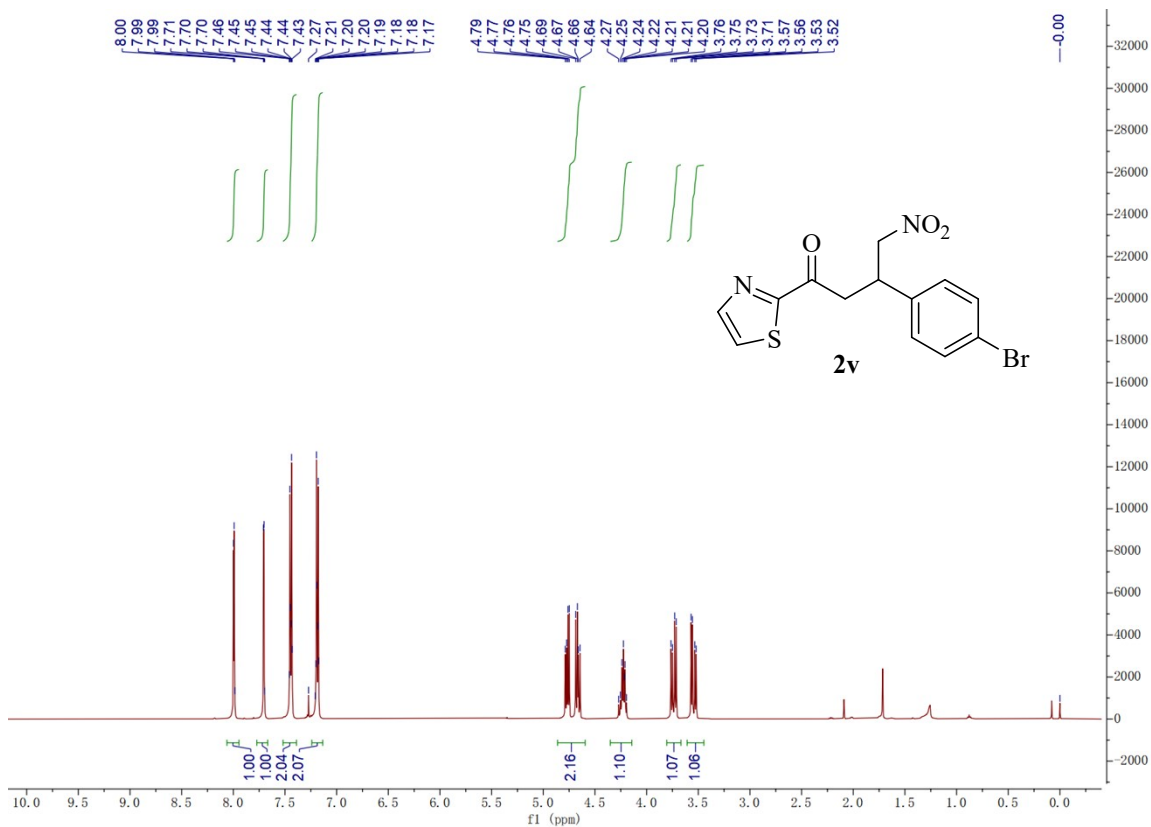

$^{13}\text{C}$  NMR of compound **2v** (in  $\text{CDCl}_3$ ):

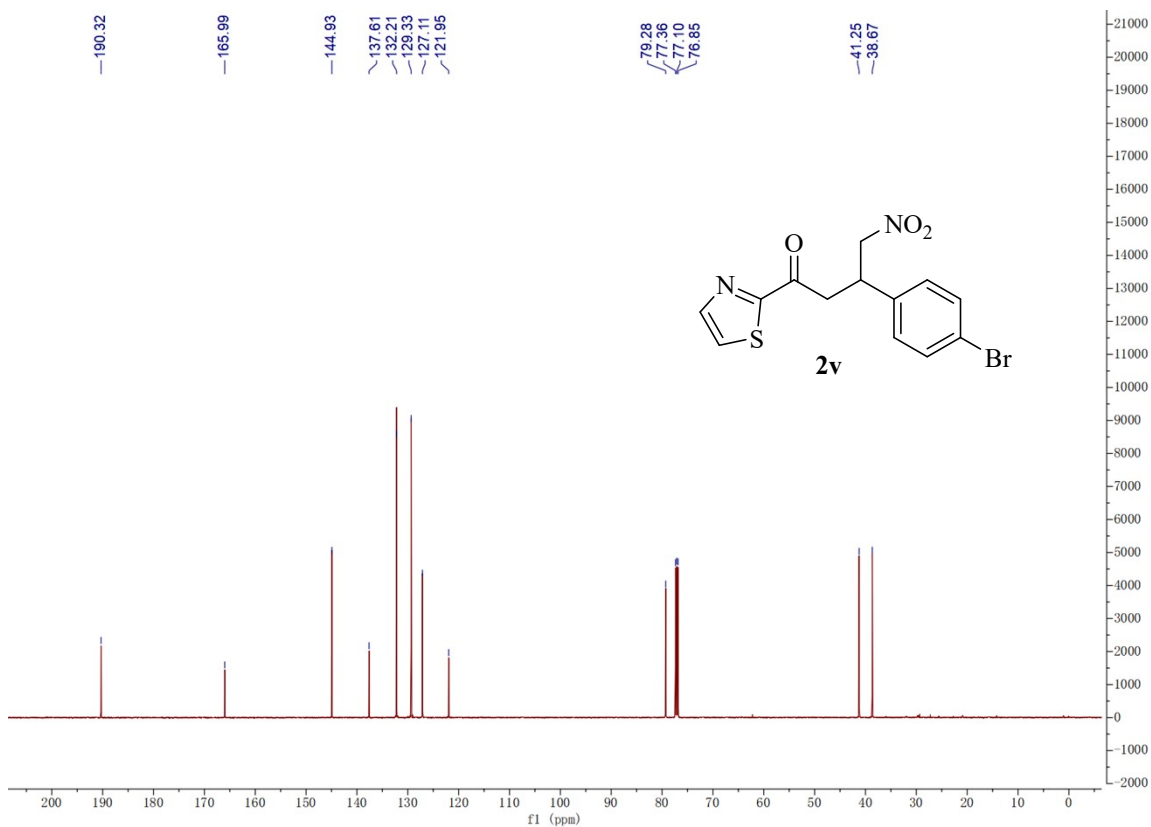

$^1\text{H}$  NMR of compound **2w** (in  $\text{CDCl}_3$ ):

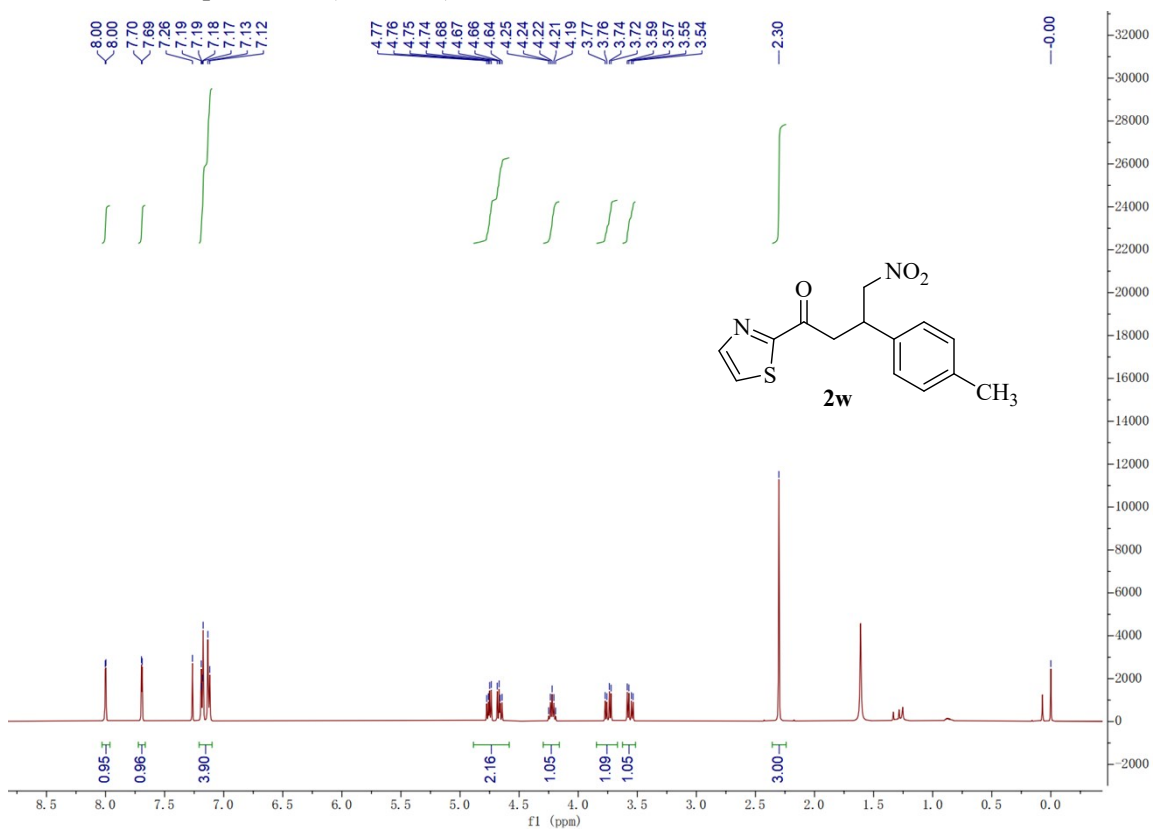

$^{13}\text{C}$  NMR of compound **2w** (in  $\text{CDCl}_3$ ):

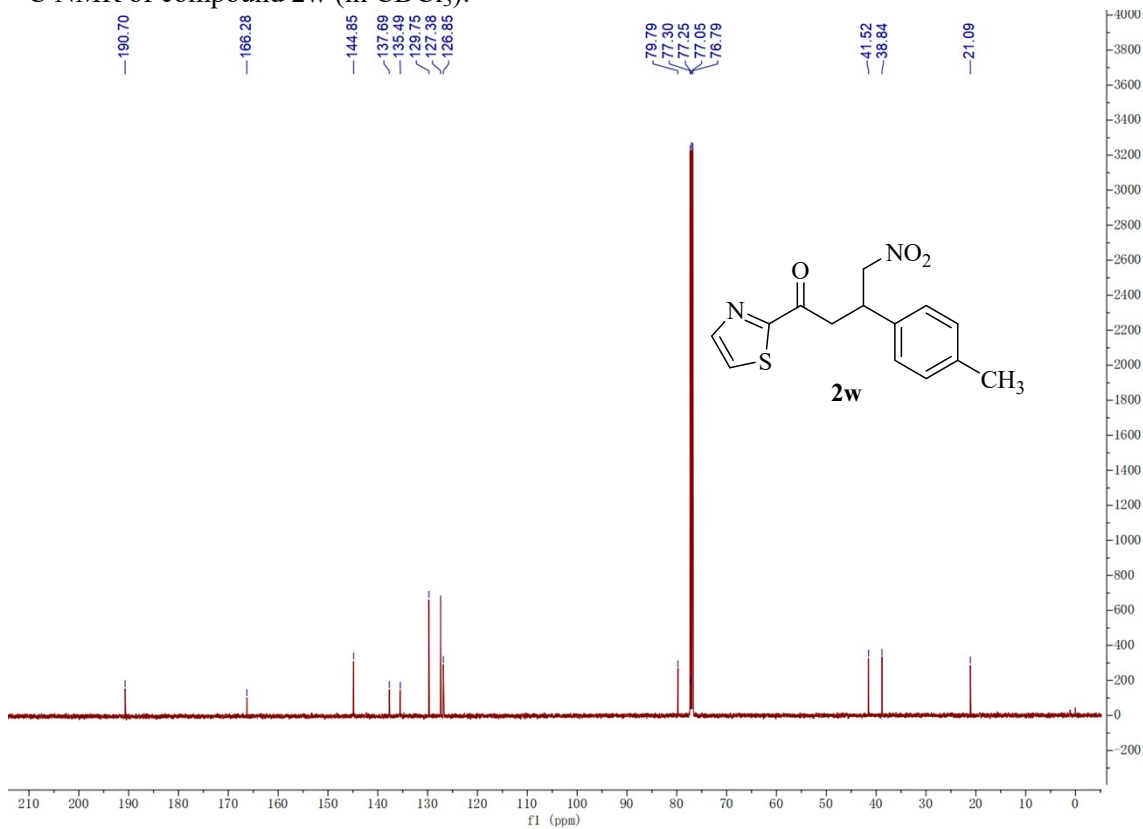



<sup>1</sup>H NMR of compound **3a** (in CDCl<sub>3</sub>):

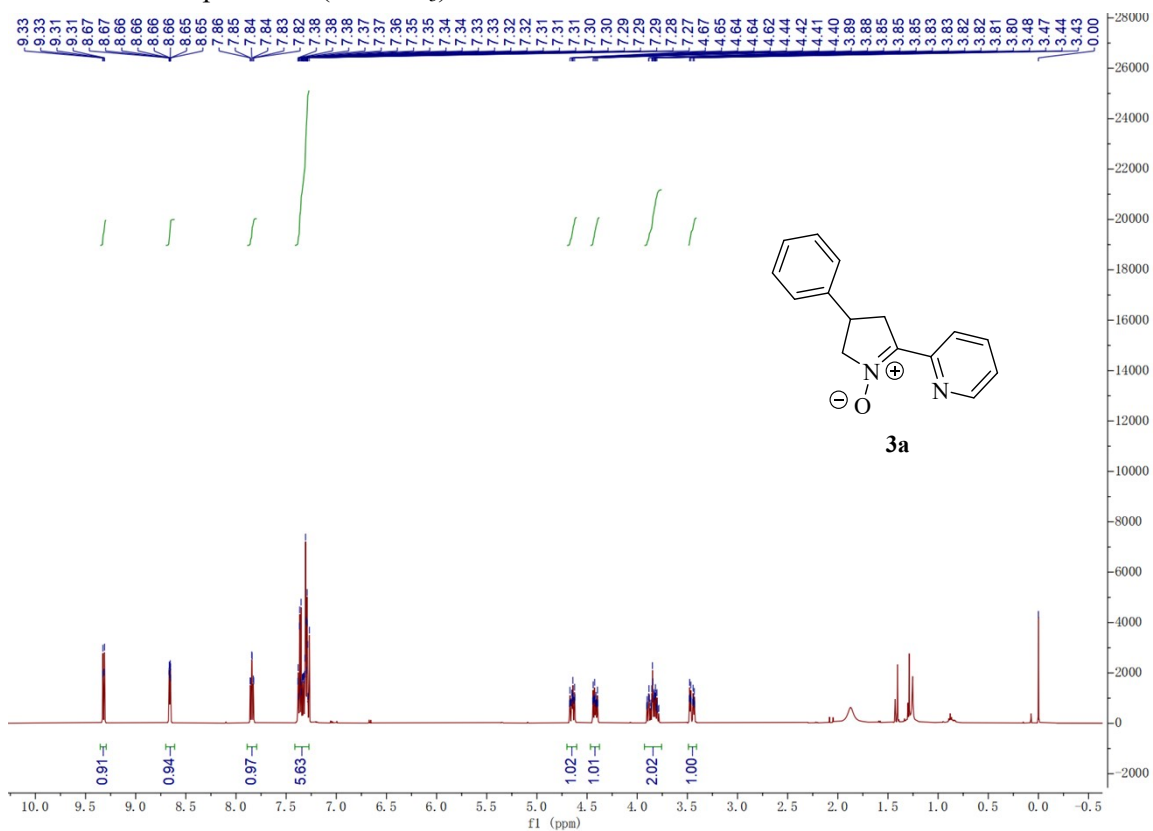

<sup>13</sup>C NMR of compound **3a** (in CDCl<sub>3</sub>):

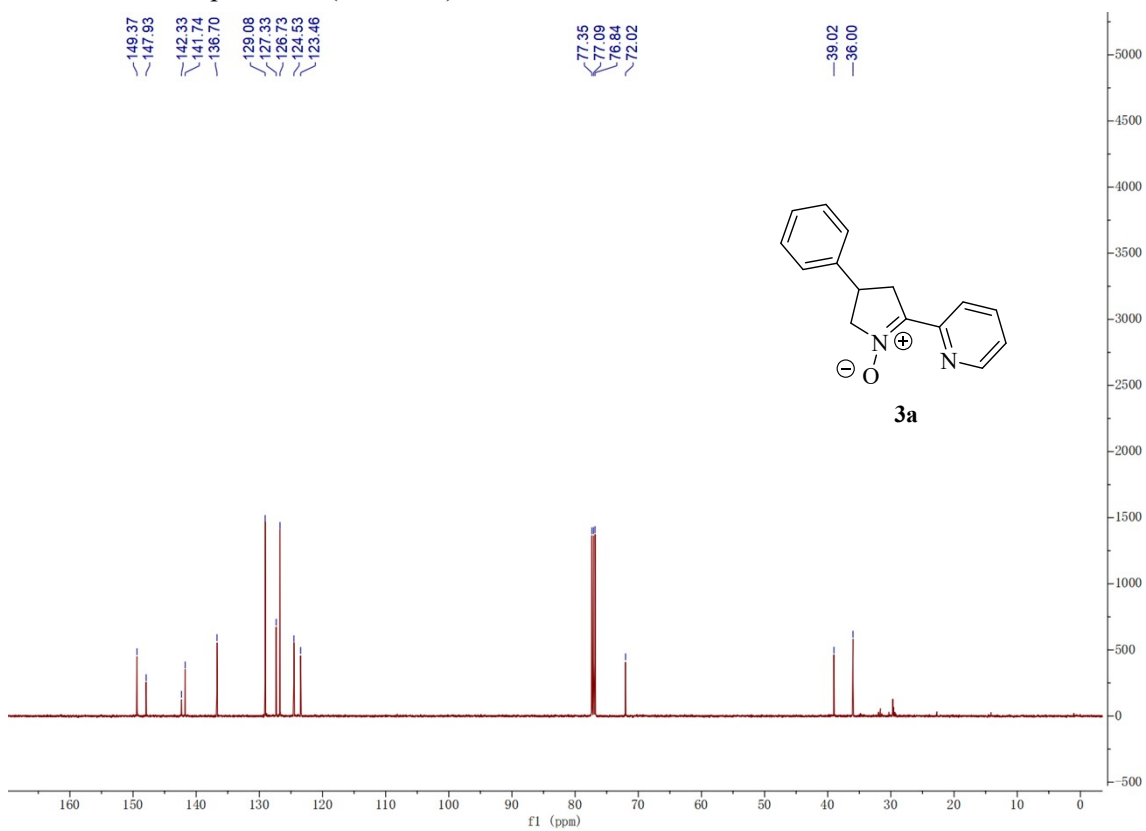

Mass spectrum of compound **3a**:

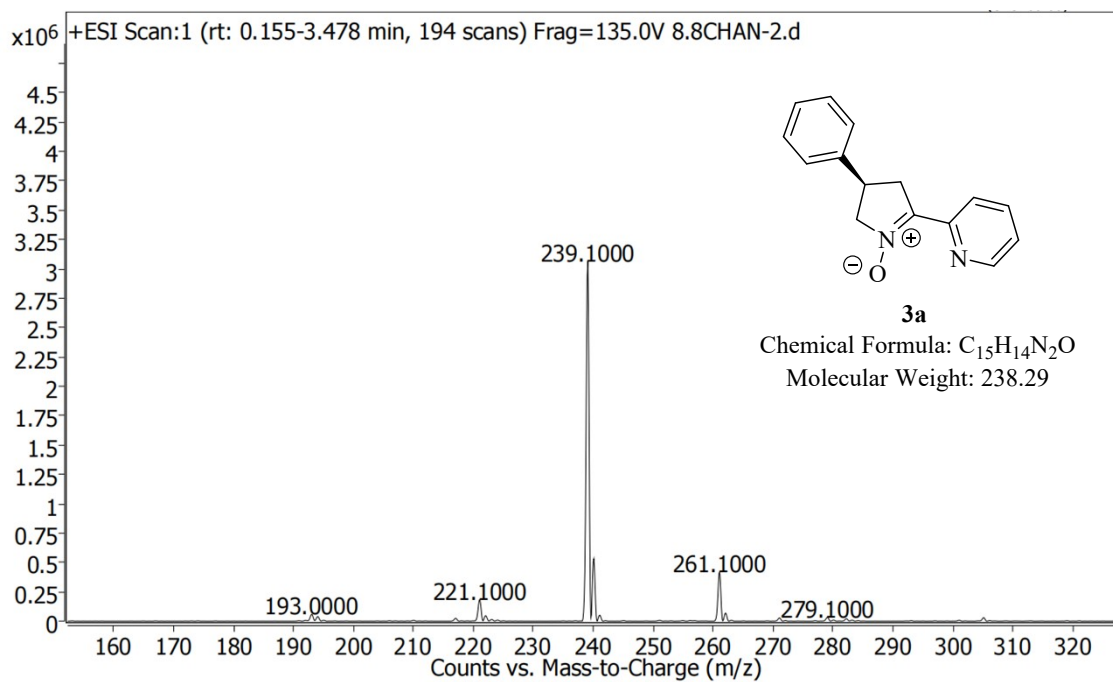

### 3. HPLC traces of racemic and chiral products 2a-2w and 3a

HPLC spectra of compound **2a** (racemic and chiral product):

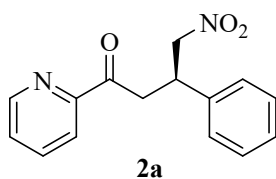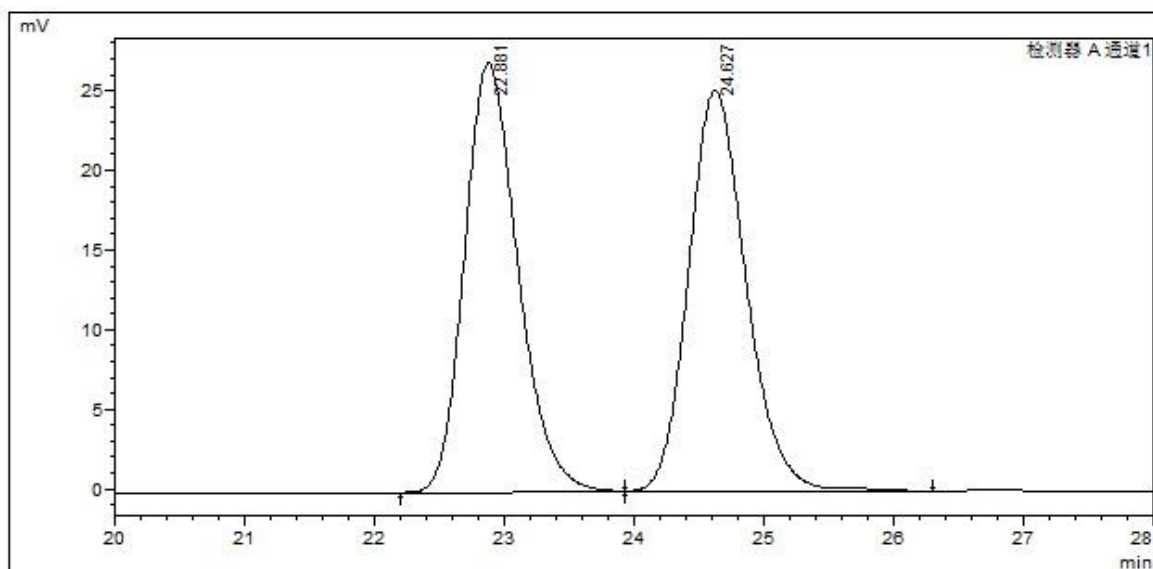

峰表

| 峰# | 保留时间   | 面积     | USP 峰宽 | 高度    | 面积 %   |
|----|--------|--------|--------|-------|--------|
| 1  | 22.881 | 772764 | 0.749  | 26940 | 49.785 |
| 2  | 24.627 | 779446 | 0.803  | 25229 | 50.215 |

检测器 A Ch1 254nm

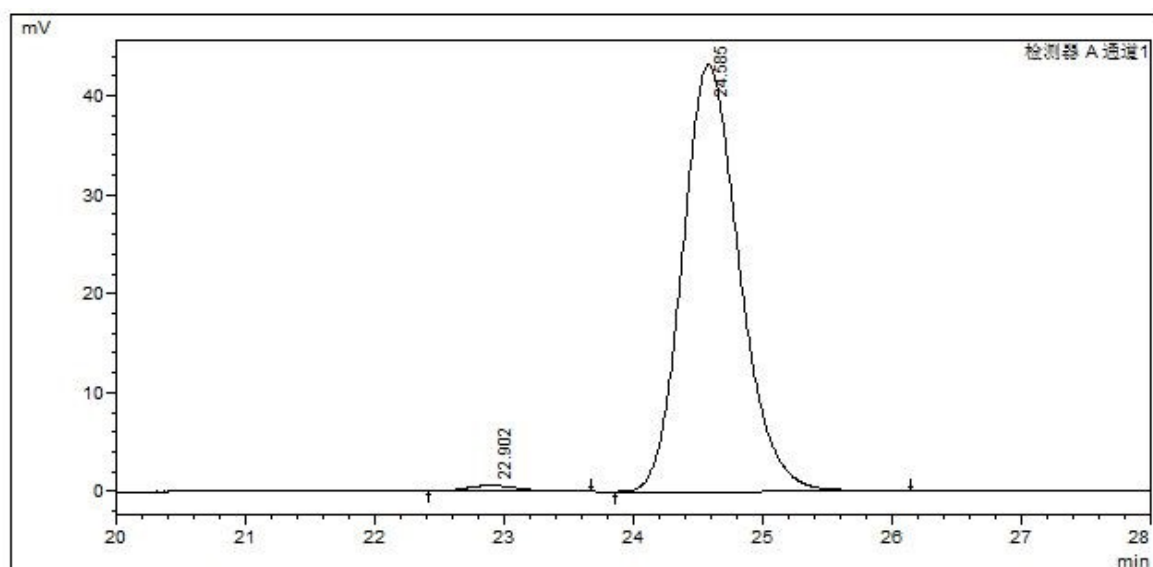

峰表

| 峰# | 保留时间   | 面积      | USP 峰宽 | 高度    | 面积 %   |
|----|--------|---------|--------|-------|--------|
| 1  | 22.902 | 16941   | 0.727  | 606   | 1.266  |
| 2  | 24.585 | 1321646 | 0.802  | 43096 | 98.734 |

检测器 A Ch1 254nm

HPLC spectra of compound **2b** (racemic and chiral product):

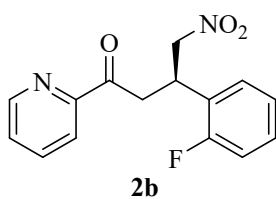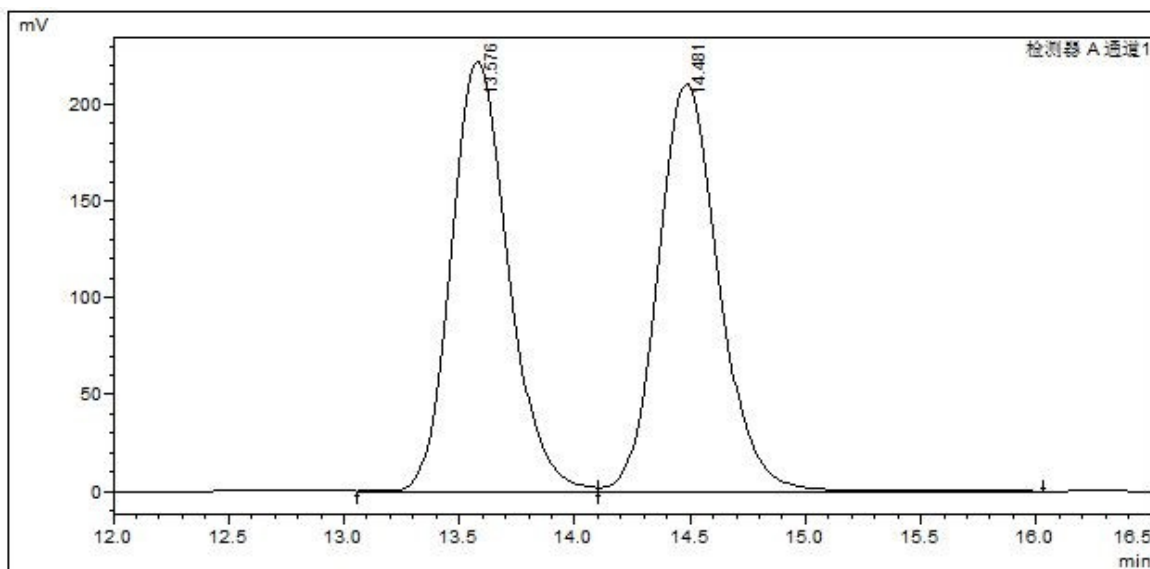

峰表

检测器 A Ch1 254nm

| 峰# | 保留时间   | 面积      | USP 峰宽 | 高度     | 面积 %   |
|----|--------|---------|--------|--------|--------|
| 1  | 13.576 | 3816781 | 0.455  | 221400 | 49.759 |
| 2  | 14.481 | 3853734 | 0.480  | 210220 | 50.241 |

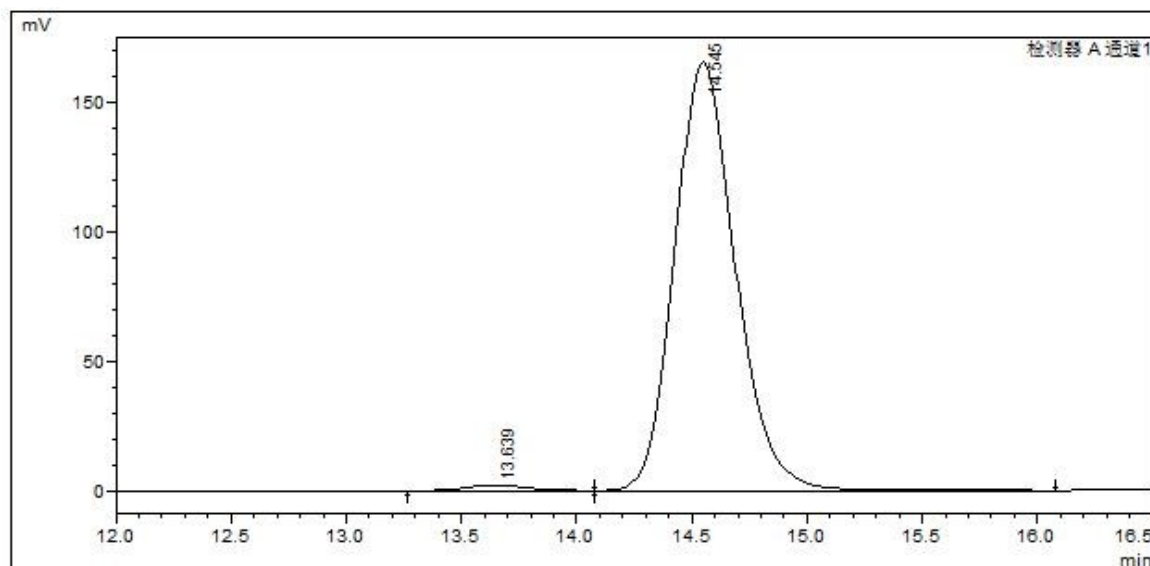

峰表

检测器 A Ch1 254nm

| 峰# | 保留时间   | 面积      | USP 峰宽 | 高度     | 面积 %   |
|----|--------|---------|--------|--------|--------|
| 1  | 13.639 | 37297   | 0.450  | 2206   | 1.212  |
| 2  | 14.545 | 3039657 | 0.483  | 165466 | 98.788 |

HPLC spectra of compound **2c** (racemic and chiral product):

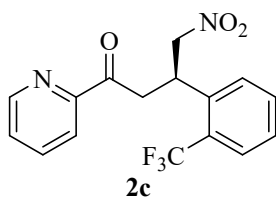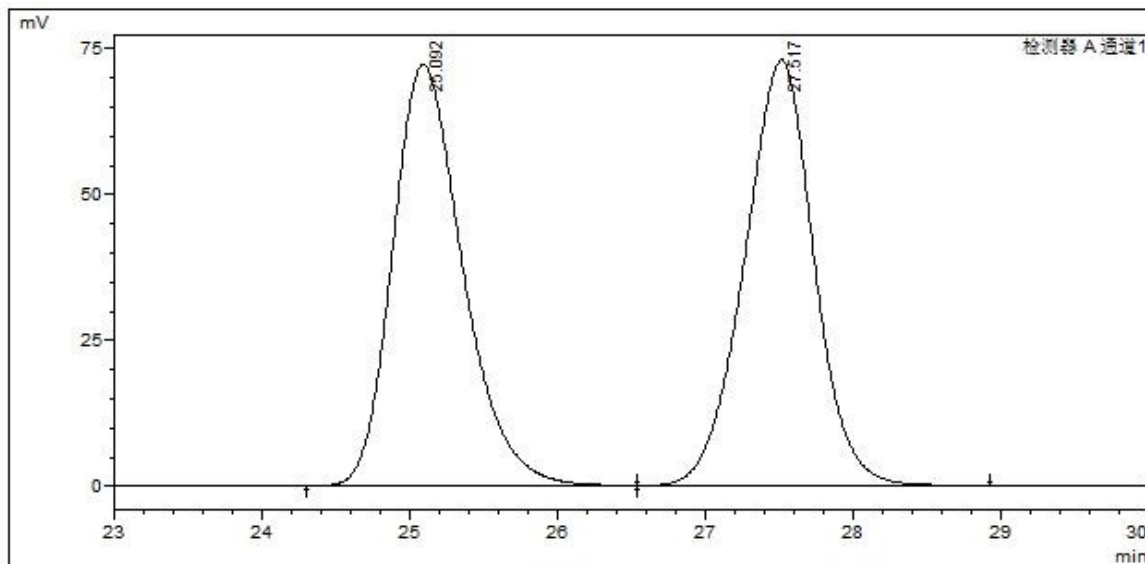

峰表

| 峰# | 保留时间   | 面积      | USP 峰宽 | 高度    | 面积 %   |
|----|--------|---------|--------|-------|--------|
| 1  | 25.092 | 2380743 | 0.860  | 72104 | 50.009 |
| 2  | 27.517 | 2379880 | 0.862  | 72934 | 49.991 |

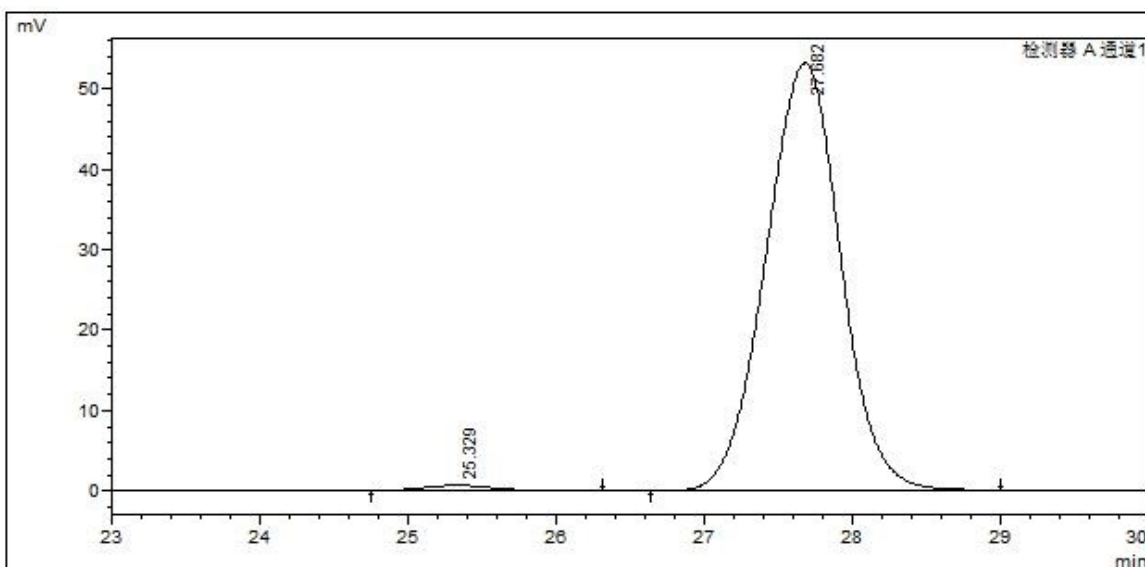

峰表

| 峰# | 保留时间   | 面积      | USP 峰宽 | 高度    | 面积 %   |
|----|--------|---------|--------|-------|--------|
| 1  | 25.329 | 21526   | 0.850  | 663   | 1.138  |
| 2  | 27.682 | 1870457 | 0.922  | 53218 | 98.862 |

HPLC spectra of compound **2d** (racemic and chiral product):

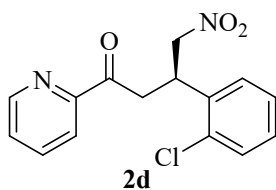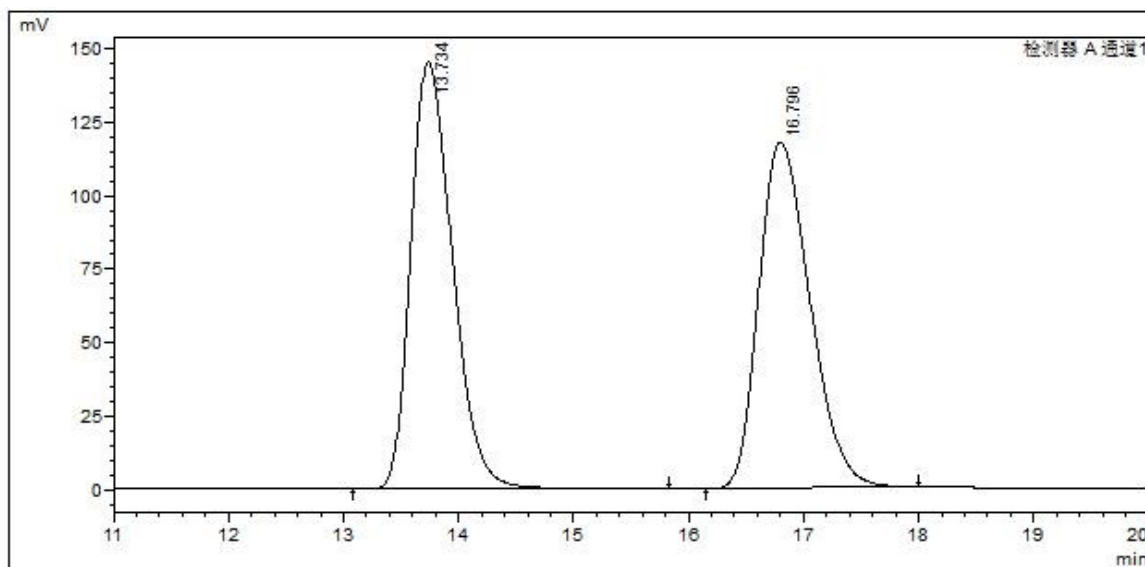

峰表

| 峰# | 保留时间   | 面积      | USP 峰宽 | 高度     | 面积 %   |
|----|--------|---------|--------|--------|--------|
| 1  | 13.734 | 3679746 | 0.670  | 145350 | 50.190 |
| 2  | 16.796 | 3651905 | 0.825  | 117915 | 49.810 |

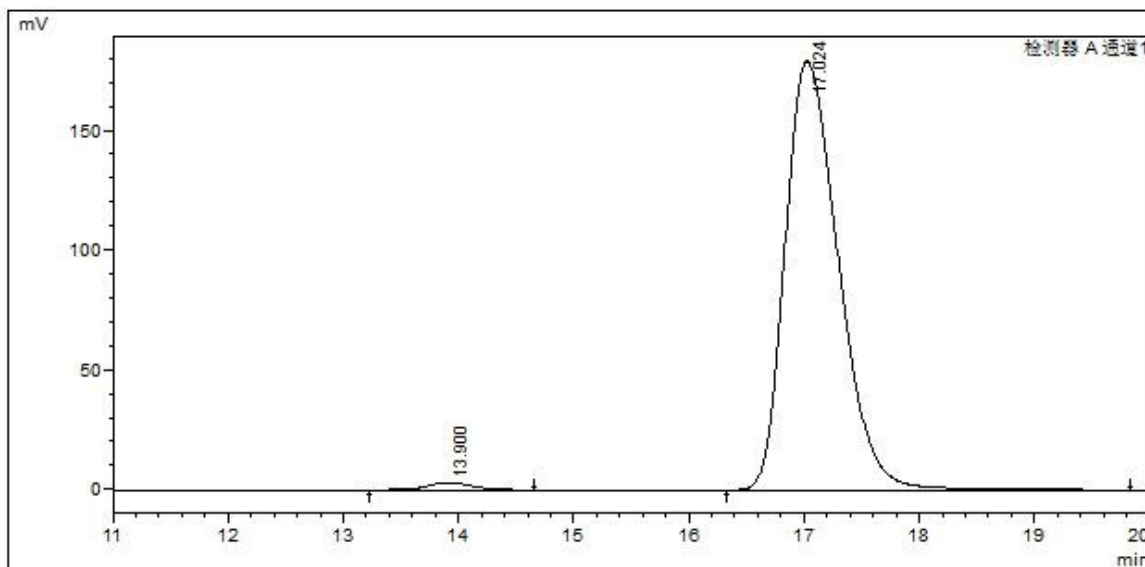

峰表

| 峰# | 保留时间   | 面积      | USP 峰宽 | 高度     | 面积 %   |
|----|--------|---------|--------|--------|--------|
| 1  | 13.900 | 79683   | 0.676  | 3107   | 1.366  |
| 2  | 17.024 | 5755058 | 0.849  | 179044 | 98.634 |

HPLC spectra of compound **2e** (racemic and chiral product):

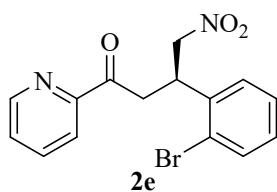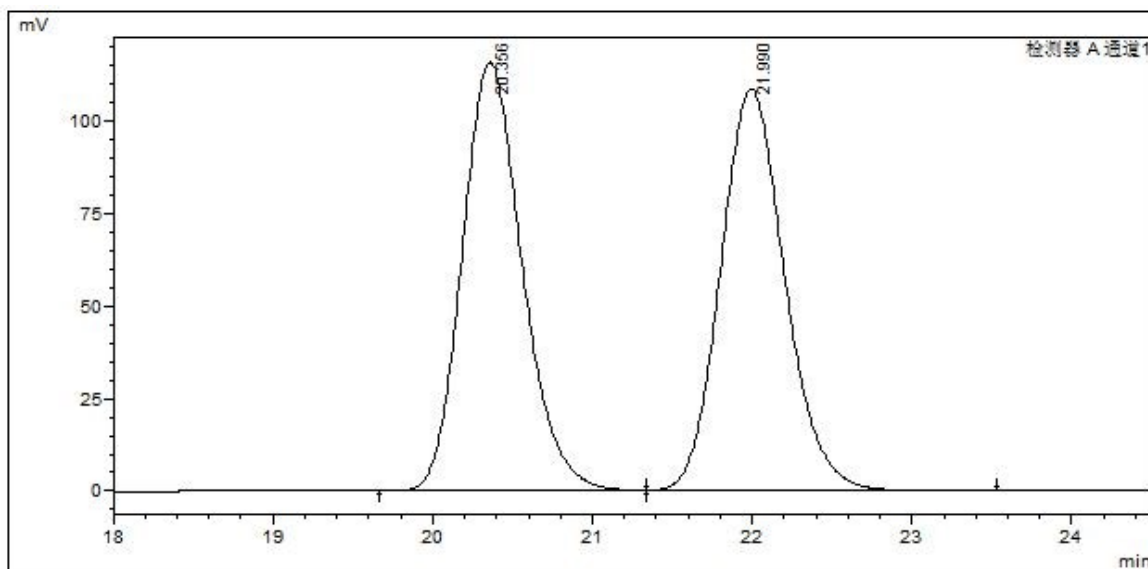

峰表

检测器 A Ch1 254nm

| 峰# | 保留时间   | 面积      | USP 峰宽 | 高度     | 面积 %   |
|----|--------|---------|--------|--------|--------|
| 1  | 20.356 | 3031382 | 0.685  | 115890 | 49.878 |
| 2  | 21.990 | 3046188 | 0.735  | 108611 | 50.122 |

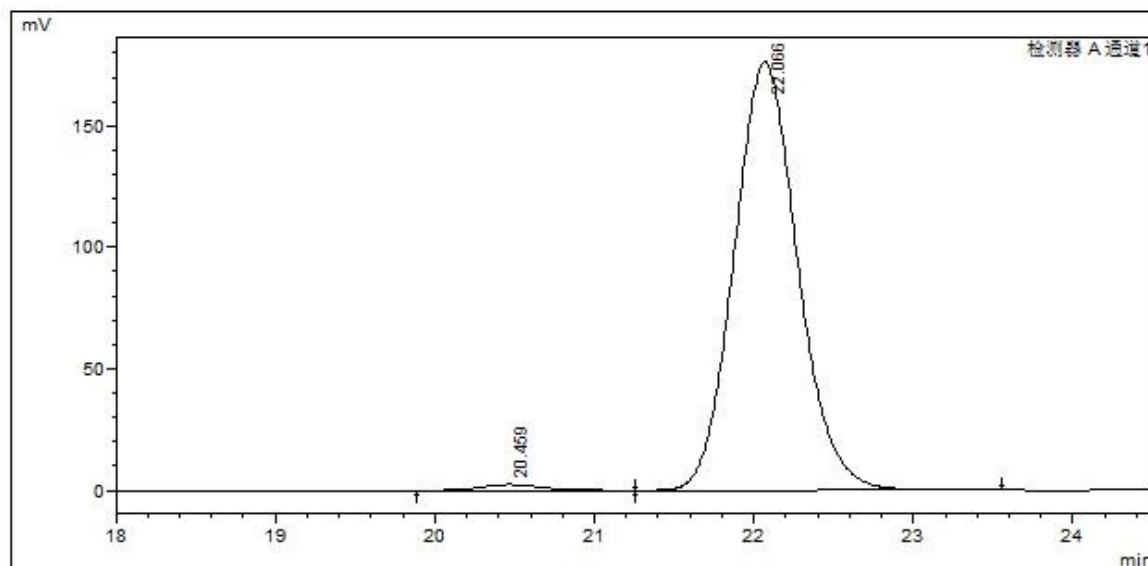

峰表

检测器 A Ch1 254nm

| 峰# | 保留时间   | 面积      | USP 峰宽 | 高度     | 面积 %   |
|----|--------|---------|--------|--------|--------|
| 1  | 20.459 | 60645   | 0.676  | 2361   | 1.224  |
| 2  | 22.066 | 4895548 | 0.729  | 176180 | 98.776 |

HPLC spectra of compound **2f** (racemic and chiral product):

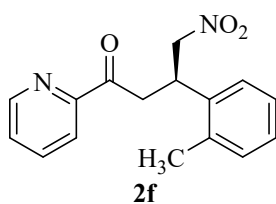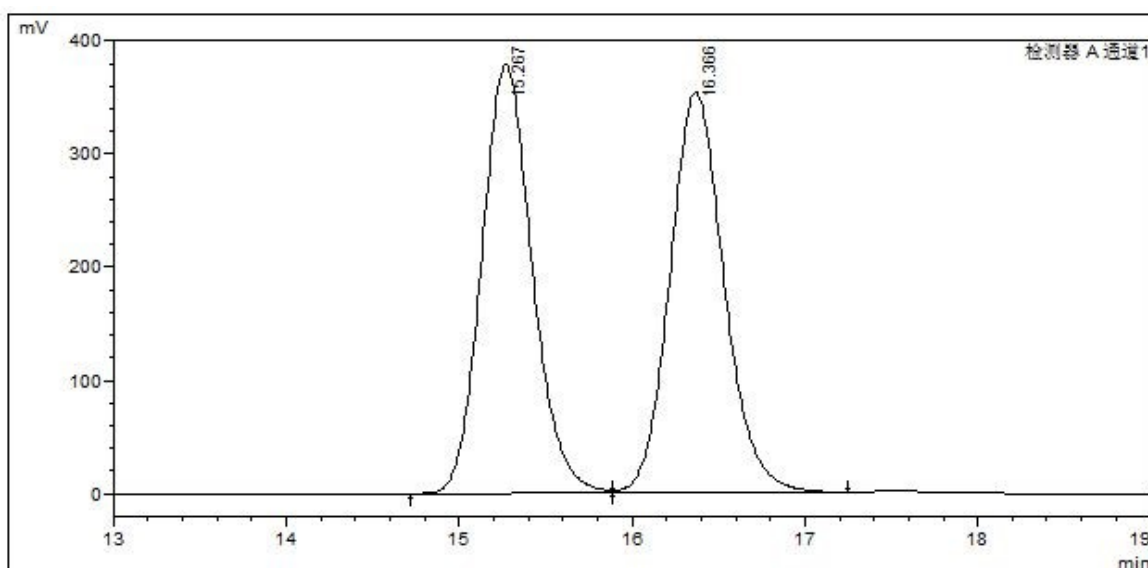

峰表

| 峰# | 保留时间   | 面积      | USP 峰宽 | 高度     | 面积 %   |
|----|--------|---------|--------|--------|--------|
| 1  | 15.267 | 7686046 | 0.534  | 378292 | 49.943 |
| 2  | 16.366 | 7703713 | 0.570  | 353975 | 50.057 |

检测器 A Ch1 254nm

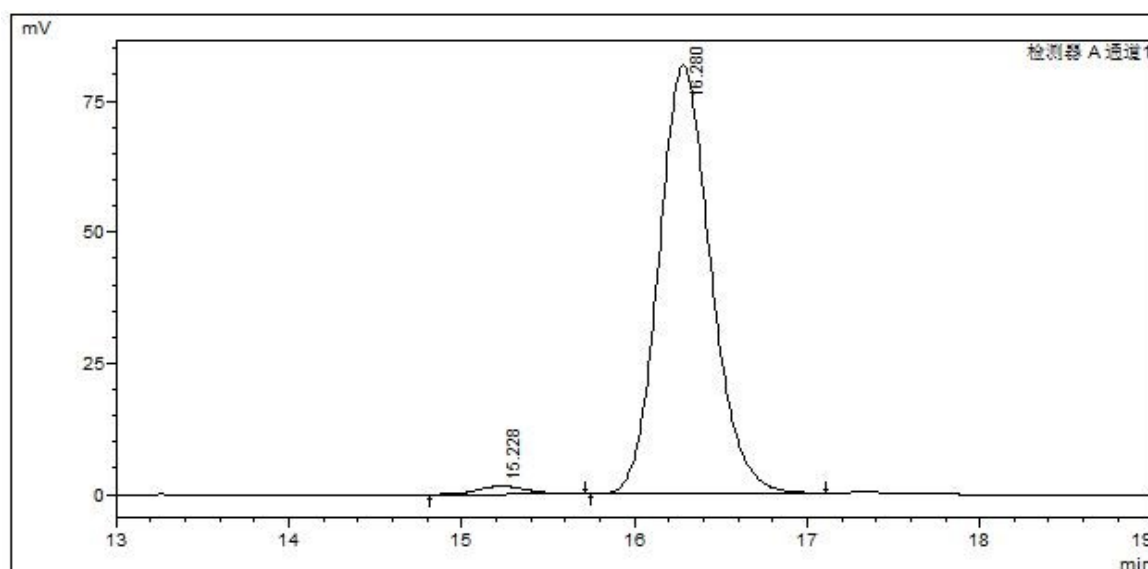

峰表

| 峰# | 保留时间   | 面积      | USP 峰宽 | 高度    | 面积 %   |
|----|--------|---------|--------|-------|--------|
| 1  | 15.228 | 30308   | 0.515  | 1570  | 1.746  |
| 2  | 16.280 | 1705492 | 0.549  | 81634 | 98.254 |

检测器 A Ch1 254nm



HPLC spectra of compound **2g** (racemic and chiral product):

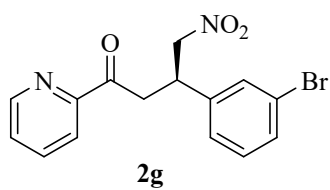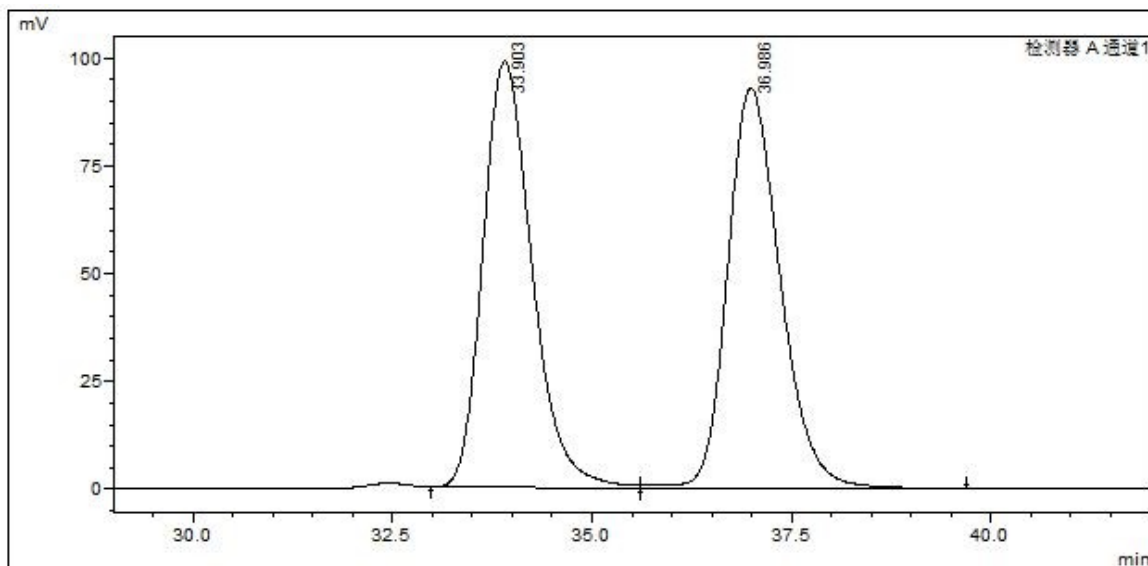

峰表

| 峰# | 保留时间   | 面积      | USP 峰宽 | 高度    | 面积 %   |
|----|--------|---------|--------|-------|--------|
| 1  | 33.903 | 4231276 | 1.107  | 98827 | 49.879 |
| 2  | 36.986 | 4251800 | 1.188  | 92686 | 50.121 |

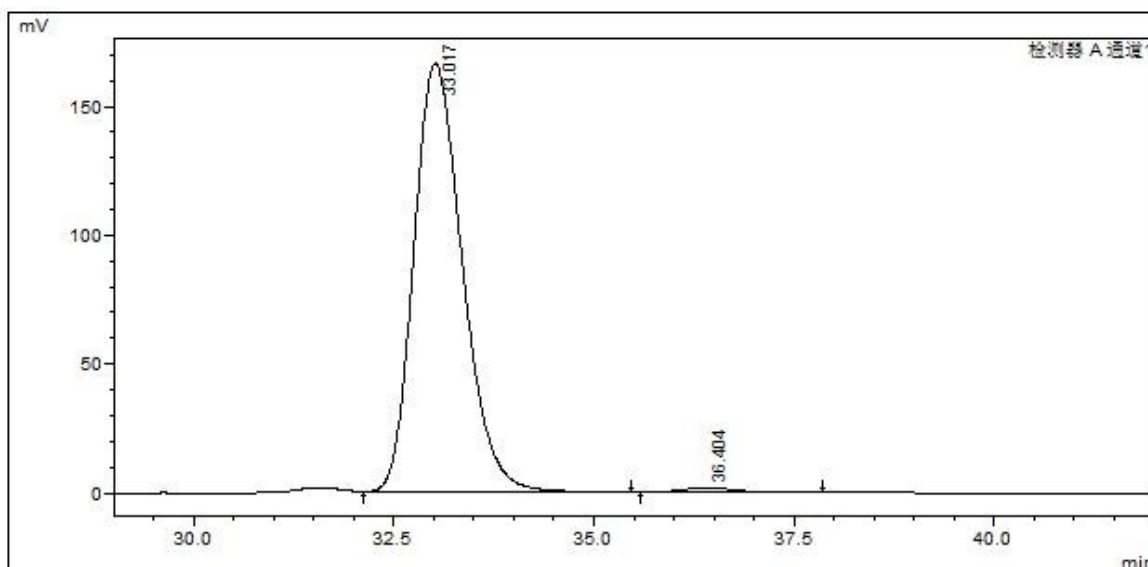

峰表

| 峰# | 保留时间   | 面积      | USP 峰宽 | 高度     | 面积 %   |
|----|--------|---------|--------|--------|--------|
| 1  | 33.017 | 7020800 | 1.106  | 166304 | 98.882 |
| 2  | 36.404 | 79407   | 1.200  | 1739   | 1.118  |

HPLC spectra of compound **2h** (racemic and chiral product):

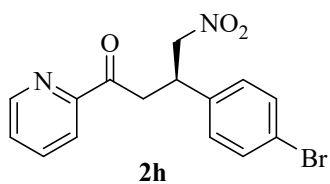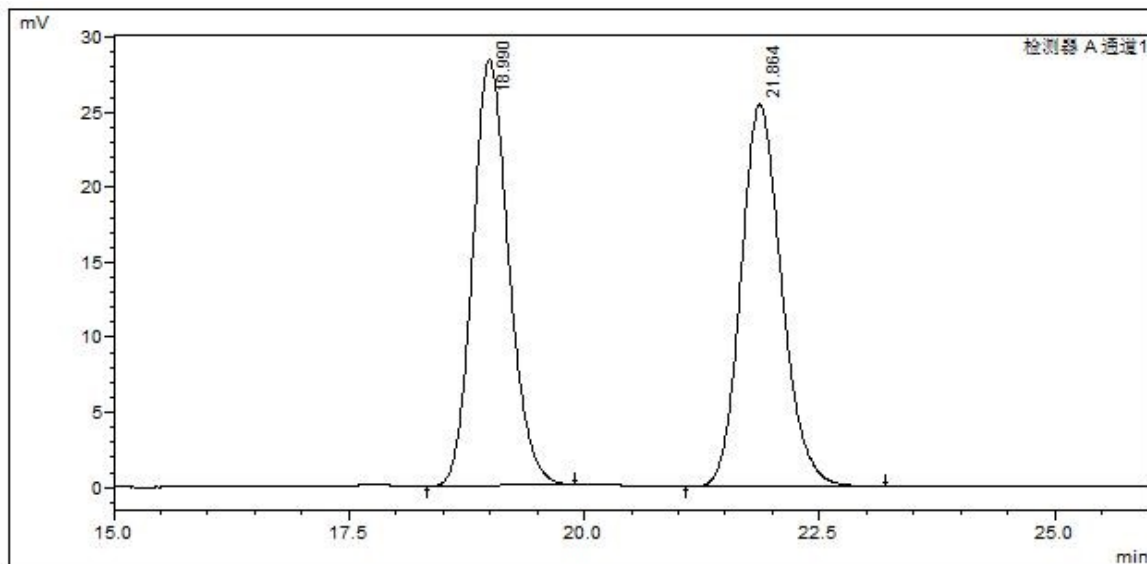

峰表

| 峰# | 保留时间   | 面积     | USP 峰宽 | 高度    | 面积 %   |
|----|--------|--------|--------|-------|--------|
| 1  | 18.990 | 759110 | 0.701  | 28391 | 49.752 |
| 2  | 21.864 | 766689 | 0.787  | 25467 | 50.248 |

检测器 A Ch1 254nm

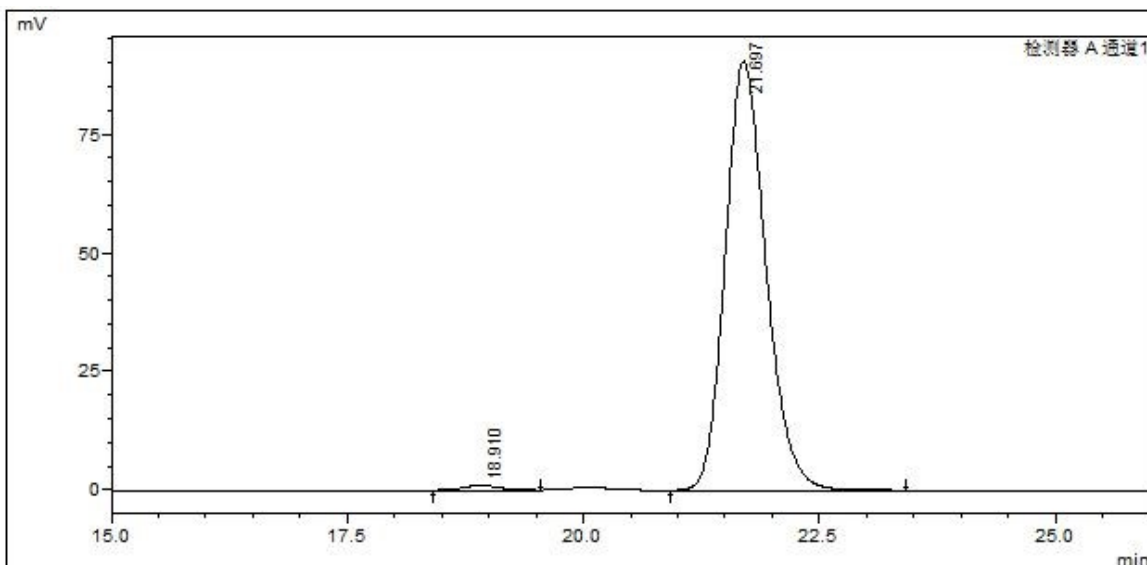

峰表

| 峰# | 保留时间   | 面积      | USP 峰宽 | 高度    | 面积 %   |
|----|--------|---------|--------|-------|--------|
| 1  | 18.910 | 25194   | 0.679  | 986   | 0.920  |
| 2  | 21.697 | 2712396 | 0.785  | 90355 | 99.080 |

检测器 A Ch1 254nm

HPLC spectra of compound **2i** (racemic and chiral product):

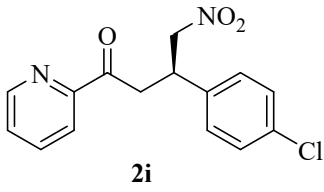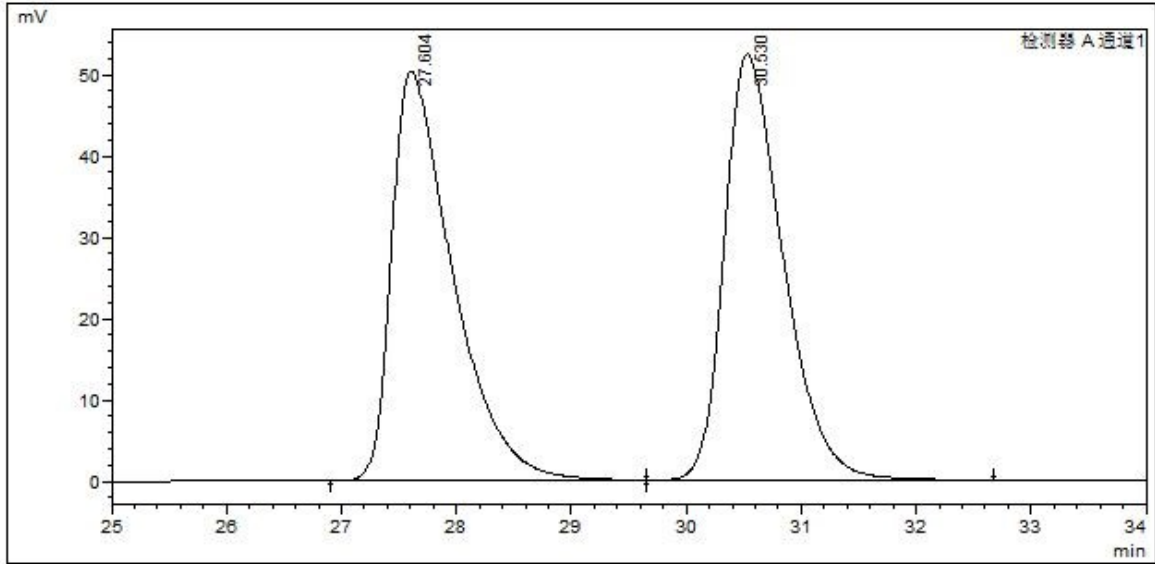

峰表

检测器 A Ch1 254nm

| 峰# | 保留时间   | 面积      | USP 峰宽 | 高度    | 面积 %   |
|----|--------|---------|--------|-------|--------|
| 1  | 27.604 | 1876385 | 0.954  | 50438 | 49.928 |
| 2  | 30.530 | 1881804 | 0.930  | 52513 | 50.072 |

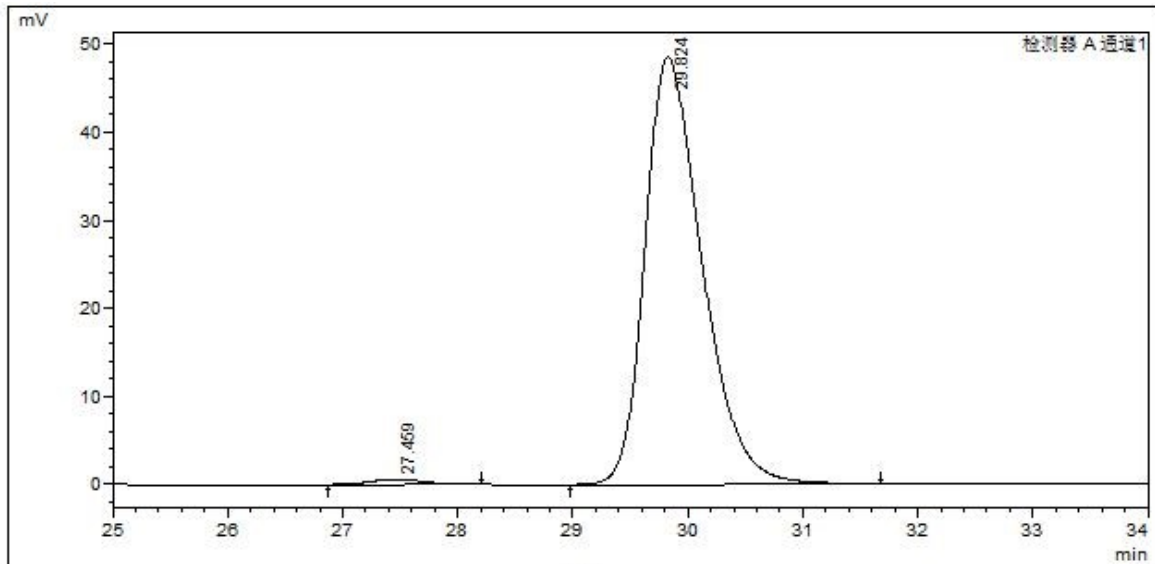

峰表

检测器 A Ch1 254nm

| 峰# | 保留时间   | 面积      | USP 峰宽 | 高度    | 面积 %   |
|----|--------|---------|--------|-------|--------|
| 1  | 27.459 | 20038   | 0.838  | 630   | 1.182  |
| 2  | 29.824 | 1675966 | 0.900  | 48501 | 98.818 |

HPLC spectra of compound **2j** (racemic and chiral product):

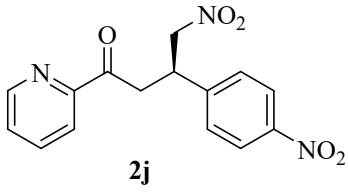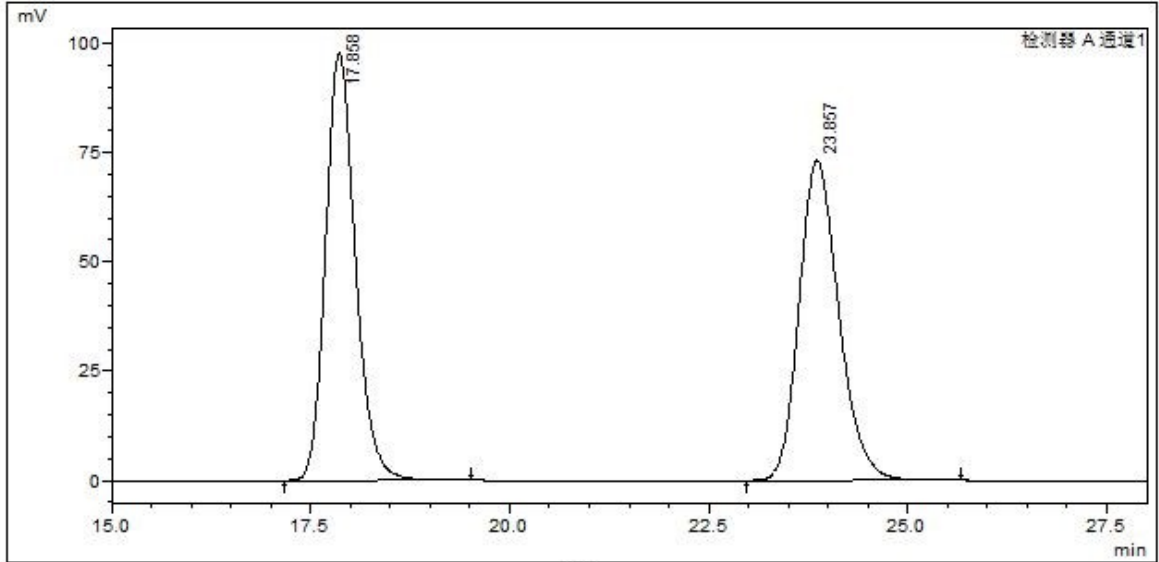

峰表

| 峰# | 保留时间   | 面积      | USP 峰宽 | 高度    | 面积 %   |
|----|--------|---------|--------|-------|--------|
| 1  | 17.858 | 2543665 | 0.676  | 97672 | 50.068 |
| 2  | 23.857 | 2536734 | 0.905  | 73158 | 49.932 |

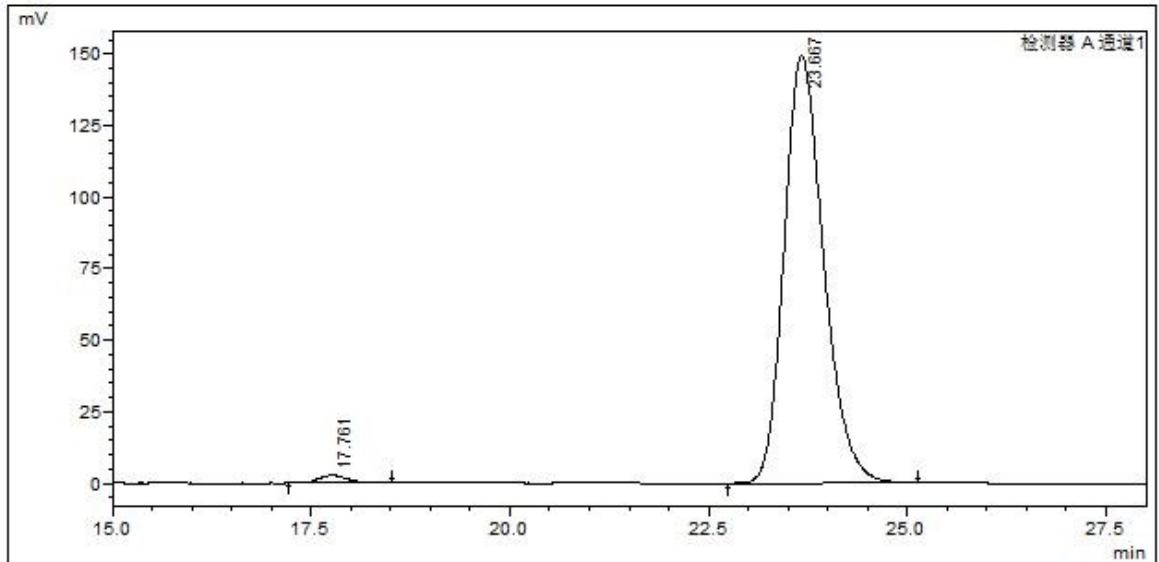

峰表

| 峰# | 保留时间   | 面积      | USP 峰宽 | 高度     | 面积 %   |
|----|--------|---------|--------|--------|--------|
| 1  | 17.761 | 69369   | 0.667  | 2732   | 1.326  |
| 2  | 23.667 | 5160361 | 0.905  | 149130 | 98.674 |

HPLC spectra of compound **2k** (racemic and chiral product):

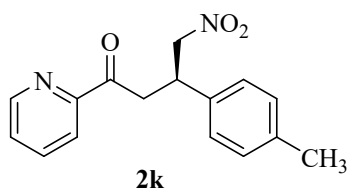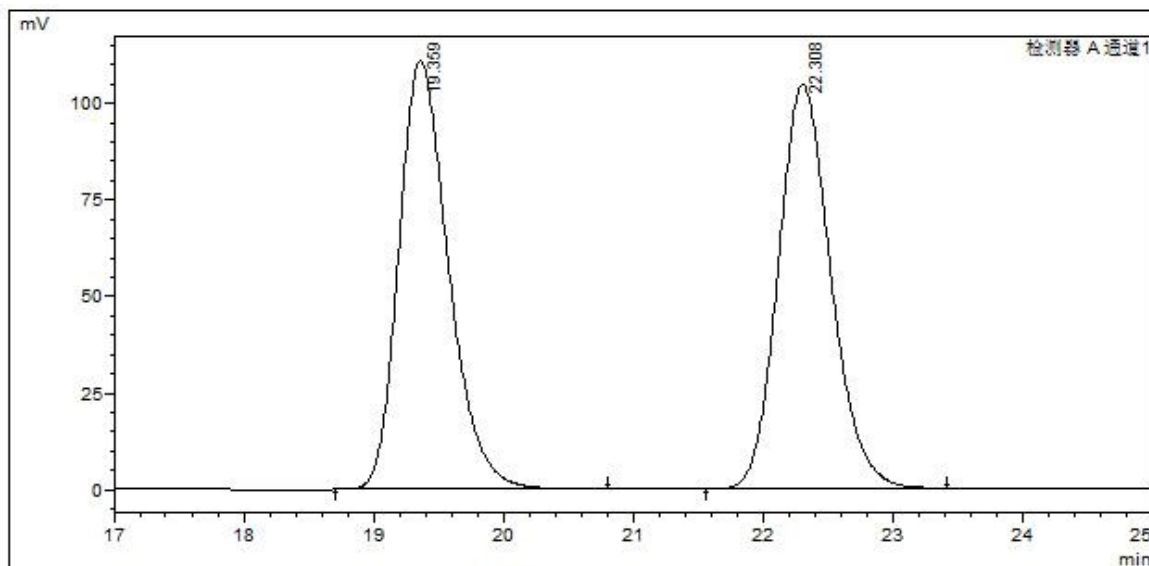

峰表

| 峰# | 保留时间   | 面积      | USP 峰宽 | 高度     | 面积 %   |
|----|--------|---------|--------|--------|--------|
| 1  | 19.359 | 2958926 | 0.697  | 110863 | 50.047 |
| 2  | 22.308 | 2953389 | 0.740  | 104780 | 49.953 |

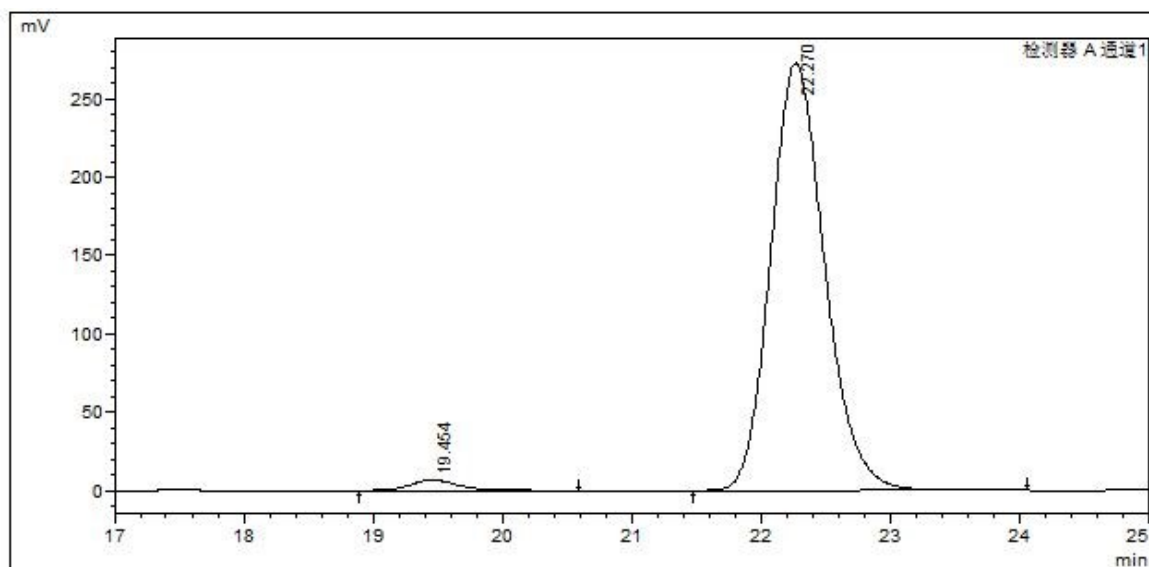

峰表

| 峰# | 保留时间   | 面积      | USP 峰宽 | 高度     | 面积 %   |
|----|--------|---------|--------|--------|--------|
| 1  | 19.454 | 166059  | 0.652  | 6646   | 2.050  |
| 2  | 22.270 | 7935978 | 0.761  | 272774 | 97.950 |

HPLC spectra of compound **21** (racemic and chiral product):

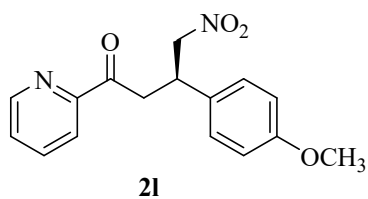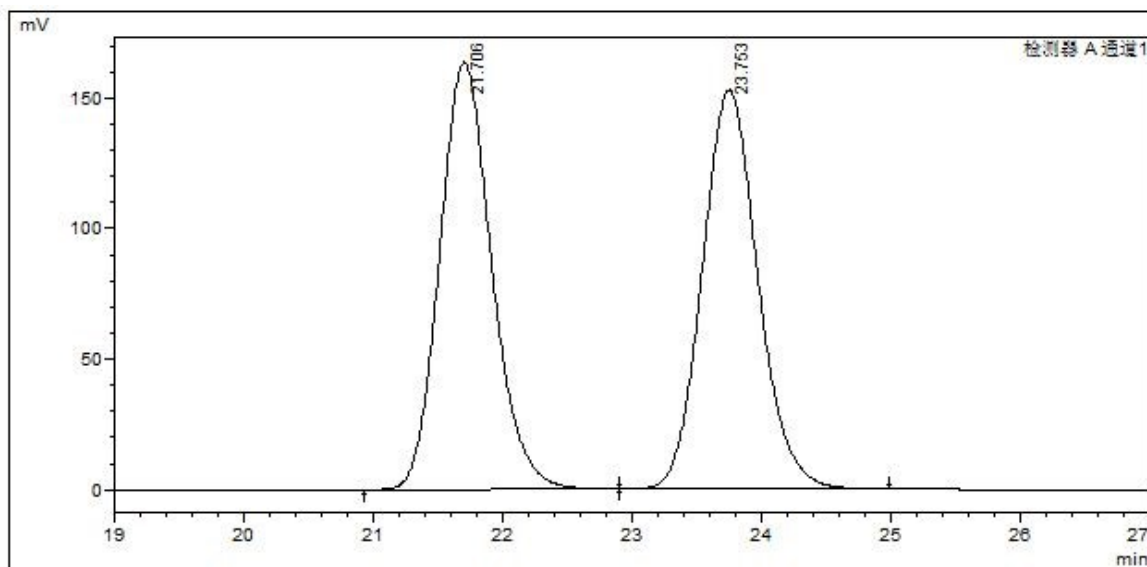

峰表

| 峰# | 保留时间   | 面积      | USP 峰宽 | 高度     | 面积 %   |
|----|--------|---------|--------|--------|--------|
| 1  | 21.706 | 4580500 | 0.733  | 163731 | 50.042 |
| 2  | 23.753 | 4572902 | 0.784  | 152894 | 49.958 |

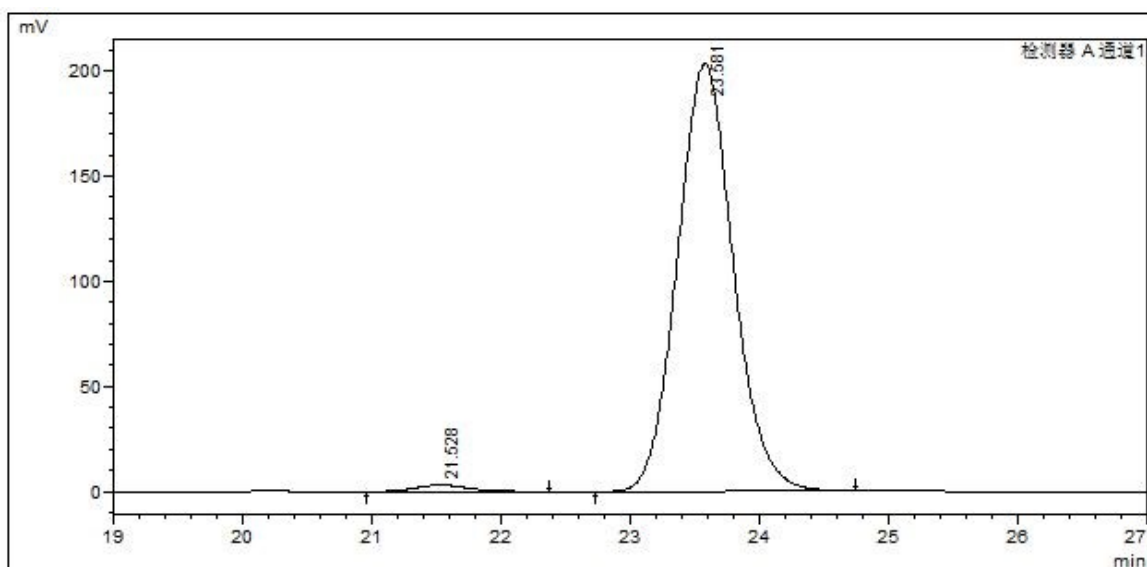

峰表

| 峰# | 保留时间   | 面积      | USP 峰宽 | 高度     | 面积 %   |
|----|--------|---------|--------|--------|--------|
| 1  | 21.528 | 85022   | 0.726  | 3085   | 1.373  |
| 2  | 23.581 | 6106939 | 0.790  | 203208 | 98.627 |

HPLC spectra of compound **2m** (racemic and chiral product):

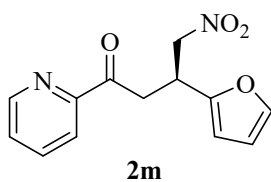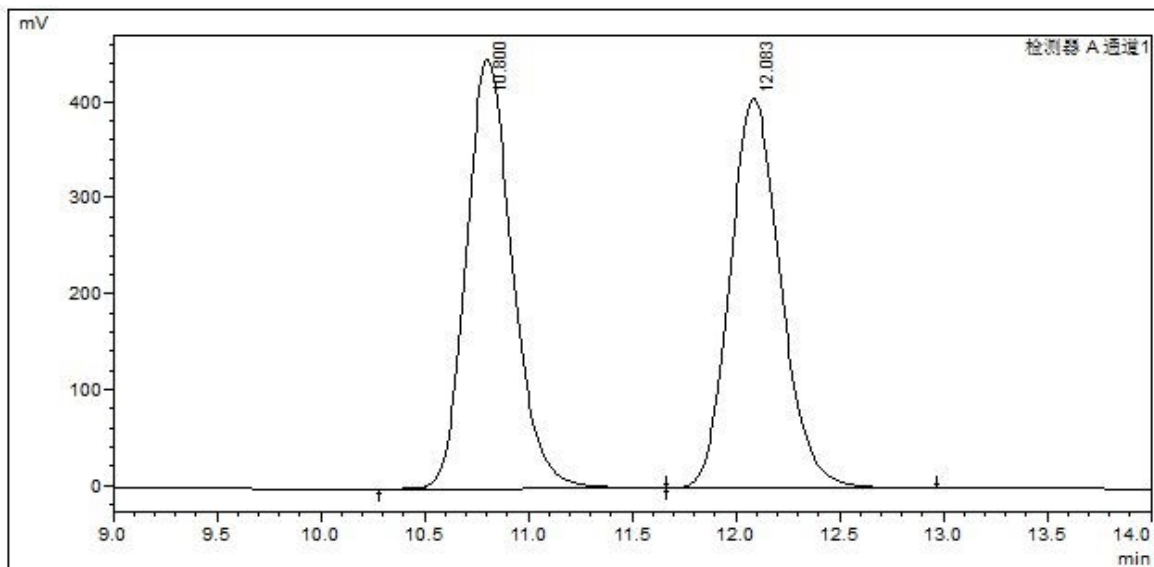

峰表

检测器 A Ch1 254nm

| 峰# | 保留时间   | 面积      | USP 峰宽 | 高度     | 面积 %   |
|----|--------|---------|--------|--------|--------|
| 1  | 10.800 | 6957924 | 0.409  | 447020 | 50.104 |
| 2  | 12.083 | 6929059 | 0.449  | 406378 | 49.896 |

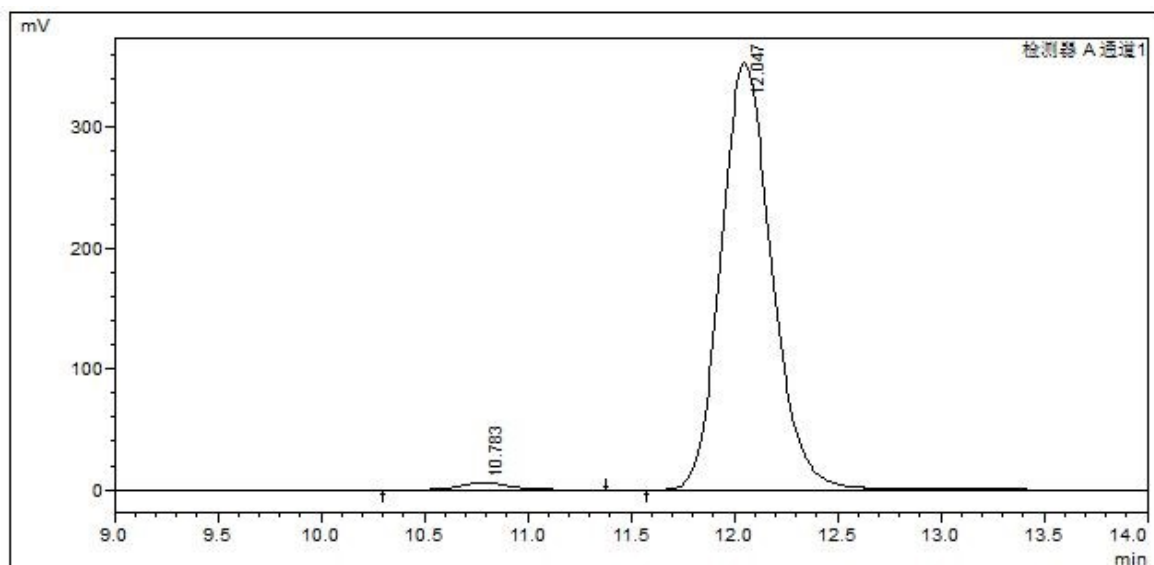

峰表

检测器 A Ch1 254nm

| 峰# | 保留时间   | 面积      | USP 峰宽 | 高度     | 面积 %   |
|----|--------|---------|--------|--------|--------|
| 1  | 10.783 | 93915   | 0.414  | 5959   | 1.529  |
| 2  | 12.047 | 6048857 | 0.450  | 353206 | 98.471 |

HPLC spectra of compound **2n** (racemic and chiral product):

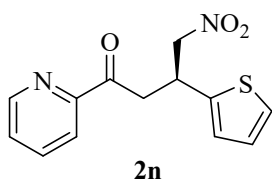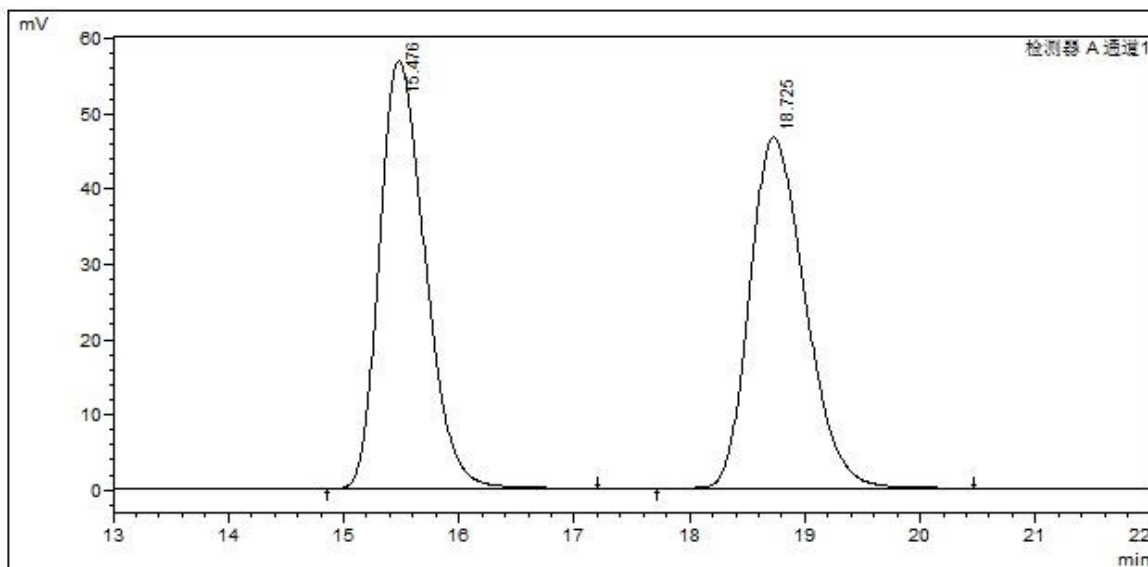

峰表

检测器 A Ch1 254nm

| 峰# | 保留时间   | 面积      | USP 峰宽 | 高度    | 面积 %   |
|----|--------|---------|--------|-------|--------|
| 1  | 15.476 | 1565340 | 0.729  | 56852 | 50.002 |
| 2  | 18.725 | 1565215 | 0.889  | 46663 | 49.998 |

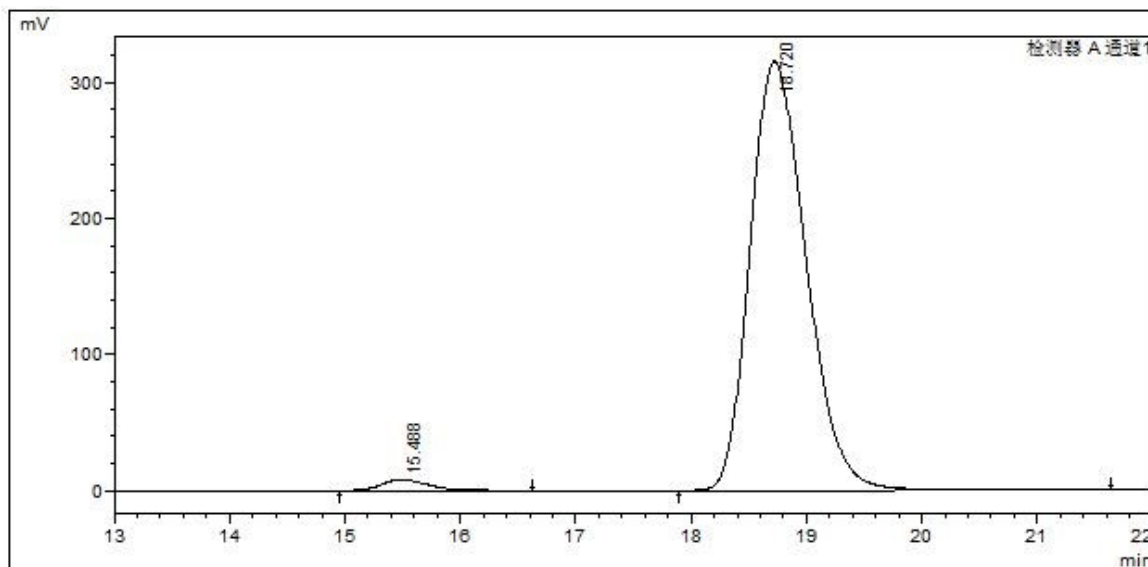

峰表

检测器 A Ch1 254nm

| 峰# | 保留时间   | 面积       | USP 峰宽 | 高度     | 面积 %   |
|----|--------|----------|--------|--------|--------|
| 1  | 15.488 | 214991   | 0.726  | 7846   | 1.976  |
| 2  | 18.720 | 10665007 | 0.894  | 315545 | 98.024 |



HPLC spectra of compound **20** (racemic and chiral product):

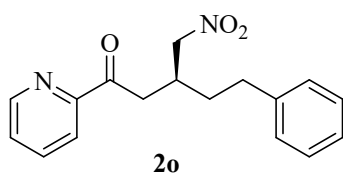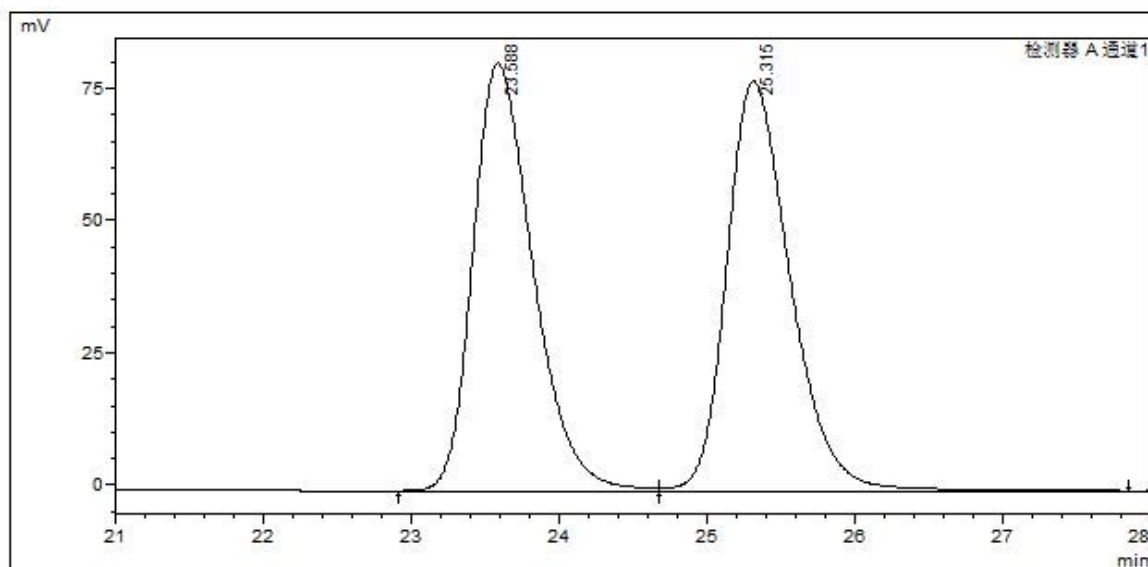

峰表

| 峰# | 保留时间   | 面积      | USP 峰宽 | 高度    | 面积 %   |
|----|--------|---------|--------|-------|--------|
| 1  | 23.588 | 2288644 | 0.737  | 80910 | 49.720 |
| 2  | 25.315 | 2314390 | 0.773  | 77410 | 50.280 |

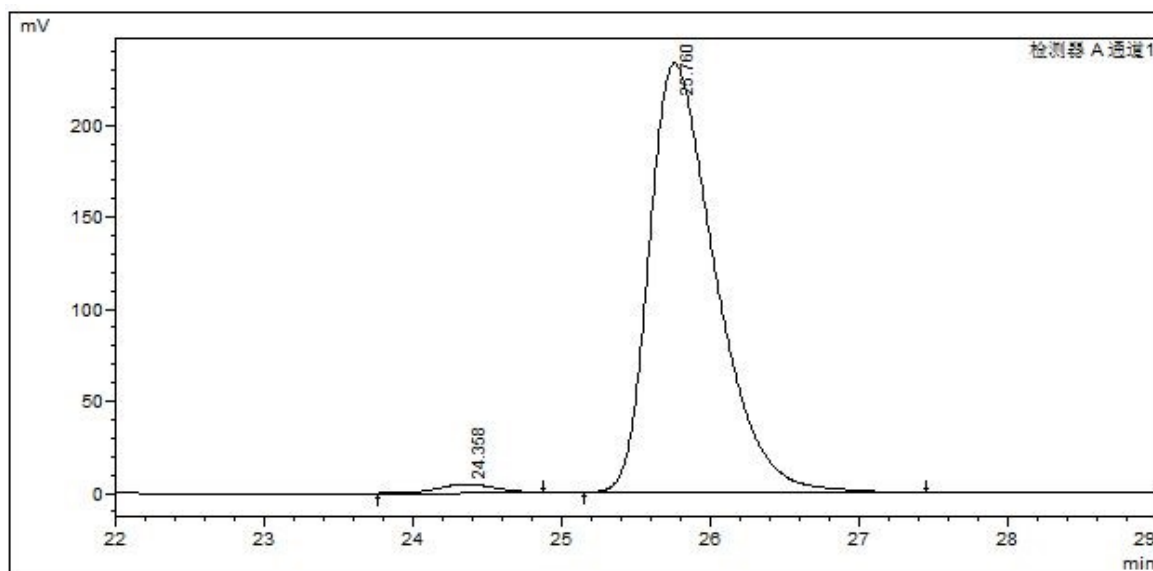

峰表

| 峰# | 保留时间   | 面积      | USP 峰宽 | 高度     | 面积 %   |
|----|--------|---------|--------|--------|--------|
| 1  | 24.358 | 115486  | 0.679  | 4589   | 1.580  |
| 2  | 25.760 | 7193449 | 0.802  | 232999 | 98.420 |

HPLC spectra of compound **2p** (racemic and chiral product):

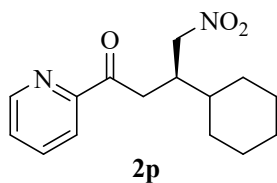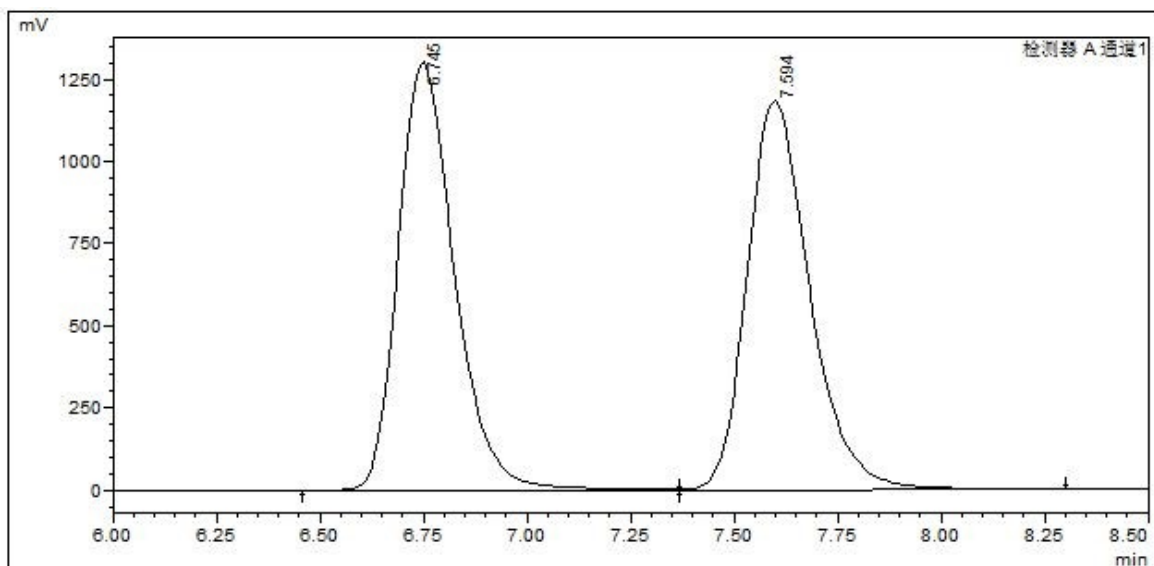

峰表

| 峰# | 保留时间  | 面积       | USP 峰宽 | 高度      | 面积 %   |
|----|-------|----------|--------|---------|--------|
| 1  | 6.745 | 12287803 | 0.253  | 1301790 | 49.689 |
| 2  | 7.594 | 12441477 | 0.279  | 1182392 | 50.311 |

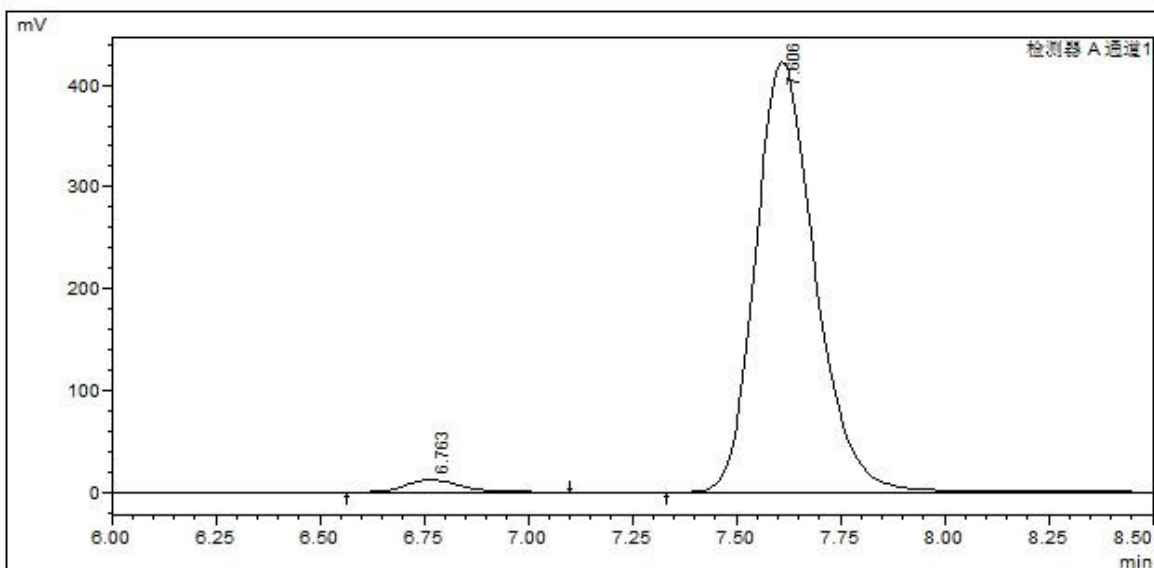

峰表

| 峰# | 保留时间  | 面积      | USP 峰宽 | 高度     | 面积 %   |
|----|-------|---------|--------|--------|--------|
| 1  | 6.763 | 106574  | 0.242  | 12016  | 2.467  |
| 2  | 7.606 | 4214051 | 0.267  | 422382 | 97.533 |

HPLC spectra of compound **2q** (racemic and chiral product):

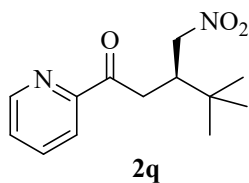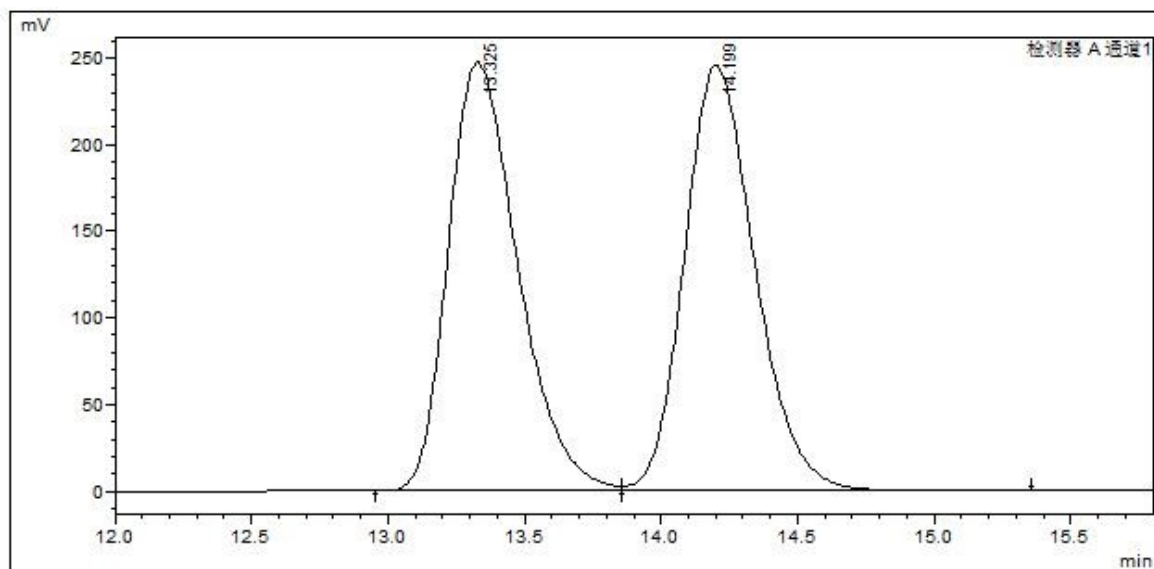

峰表

检测器 A Ch1 254nm

| 峰# | 保留时间   | 面积      | USP 峰宽 | 高度     | 面积 %   |
|----|--------|---------|--------|--------|--------|
| 1  | 13.325 | 4392073 | 0.469  | 247235 | 49.843 |
| 2  | 14.199 | 4419728 | 0.475  | 245341 | 50.157 |

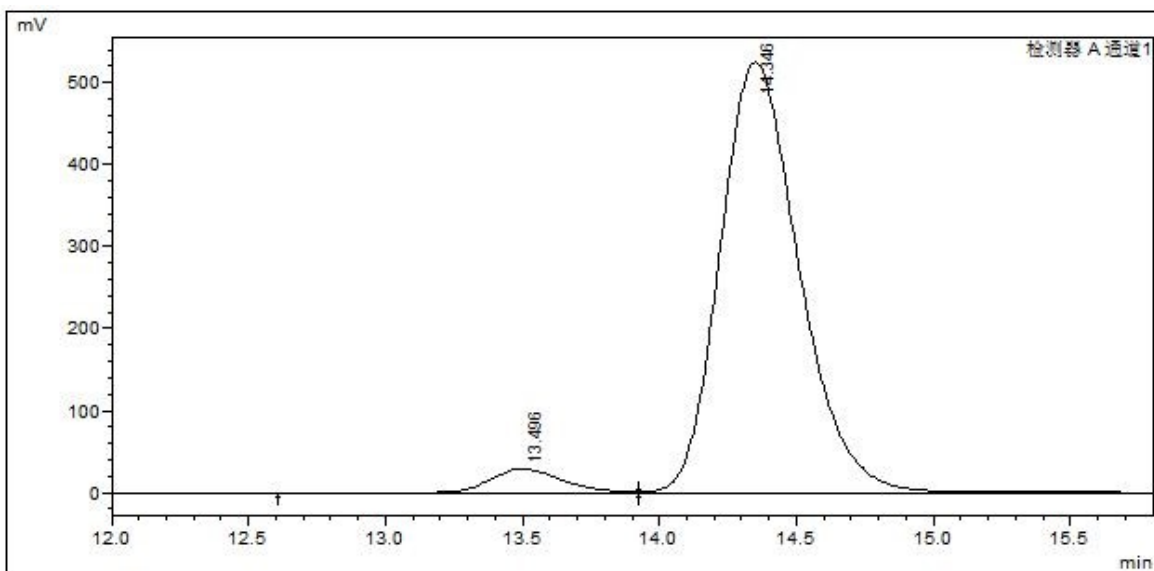

峰表

检测器 A Ch1 254nm

| 峰# | 保留时间   | 面积       | USP 峰宽 | 高度     | 面积 %   |
|----|--------|----------|--------|--------|--------|
| 1  | 13.496 | 521567   | 0.477  | 28855  | 4.728  |
| 2  | 14.346 | 10509650 | 0.527  | 524435 | 95.272 |

HPLC spectra of compound **2r** (racemic and chiral product):

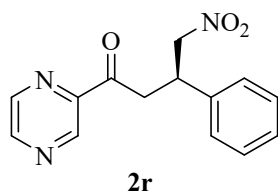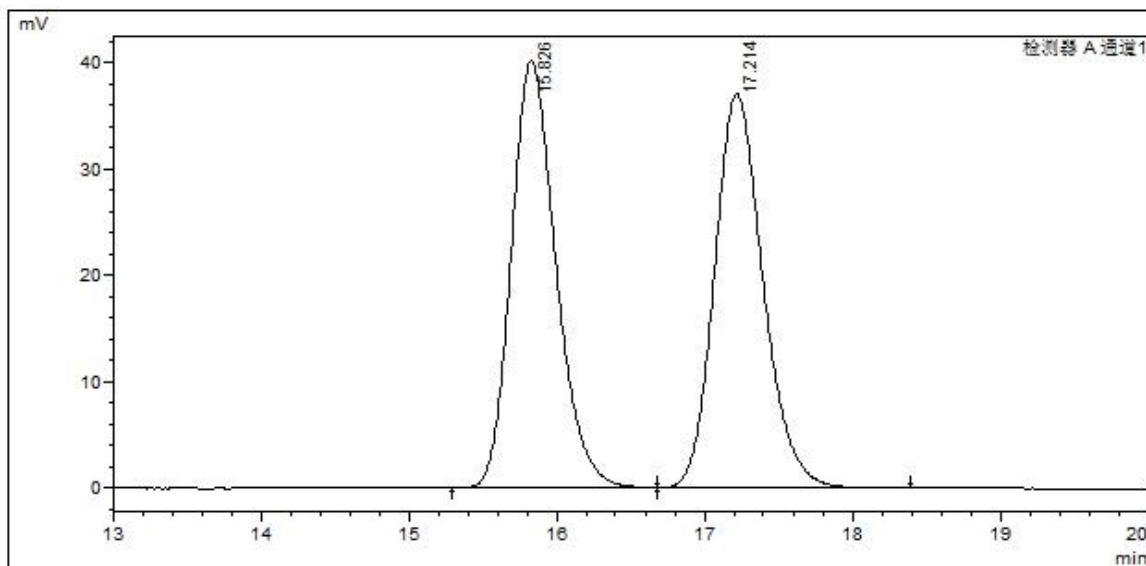

峰表

检测器 A Ch1 254nm

| 峰# | 保留时间   | 面积     | USP 峰宽 | 高度    | 面积 %   |
|----|--------|--------|--------|-------|--------|
| 1  | 15.826 | 844165 | 0.551  | 40160 | 49.911 |
| 2  | 17.214 | 847173 | 0.598  | 37046 | 50.089 |

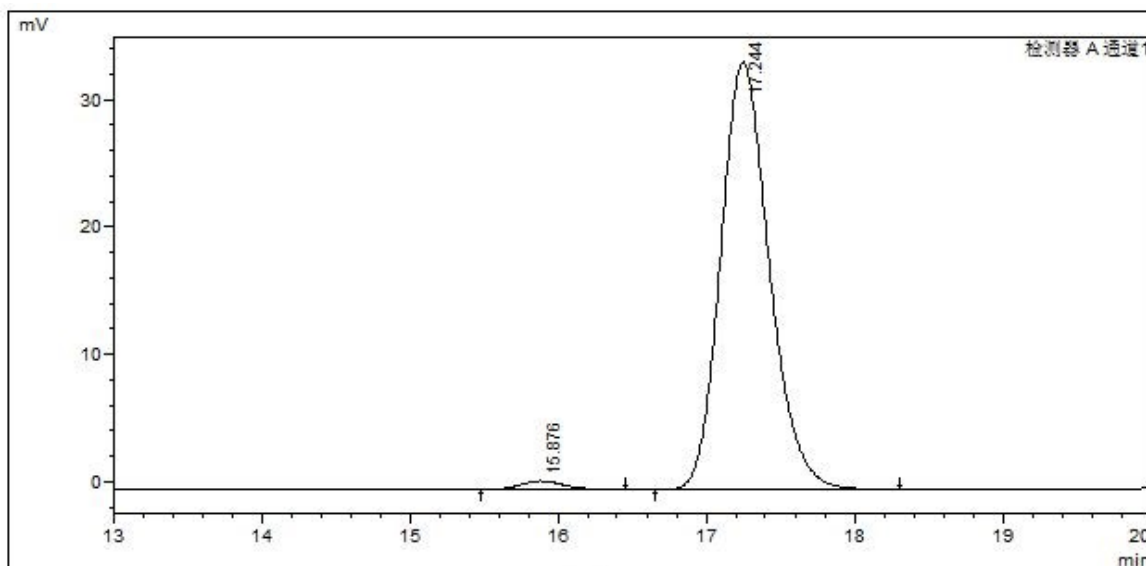

峰表

检测器 A Ch1 254nm

| 峰# | 保留时间   | 面积     | USP 峰宽 | 高度    | 面积 %   |
|----|--------|--------|--------|-------|--------|
| 1  | 15.876 | 13932  | 0.539  | 679   | 1.788  |
| 2  | 17.244 | 765179 | 0.597  | 33569 | 98.212 |

HPLC spectra of compound **2s** (racemic and chiral product):

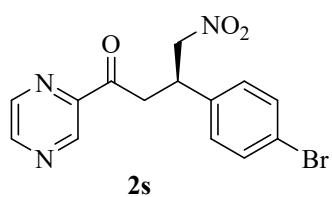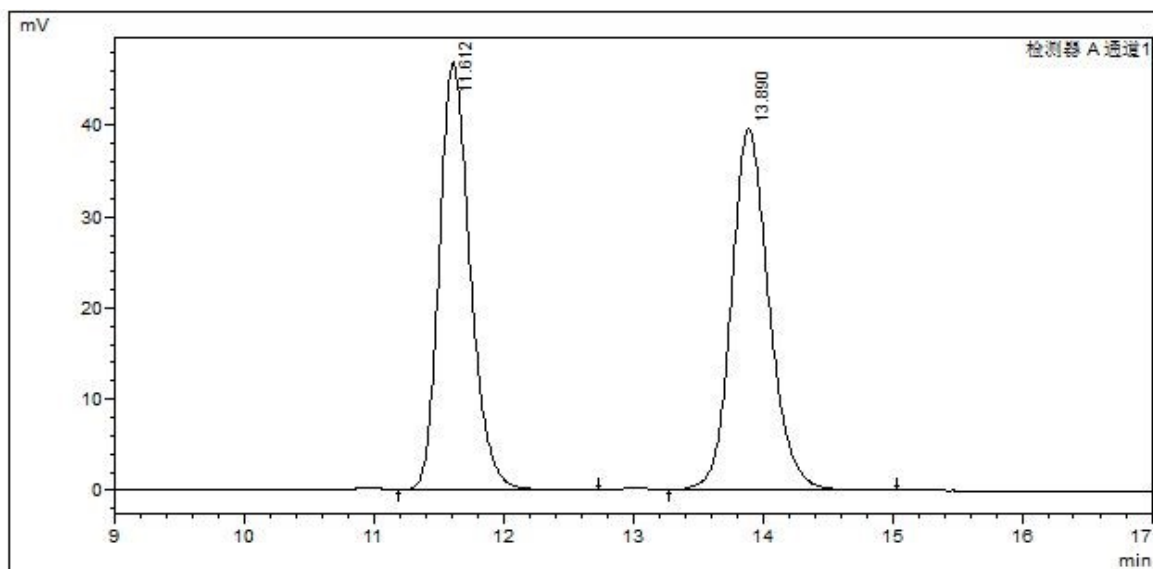

峰表

检测器 A Ch1 254nm

| 峰# | 保留时间   | 面积     | USP 峰宽 | 高度    | 面积 %   |
|----|--------|--------|--------|-------|--------|
| 1  | 11.612 | 776653 | 0.435  | 46879 | 49.277 |
| 2  | 13.890 | 799440 | 0.523  | 39589 | 50.723 |

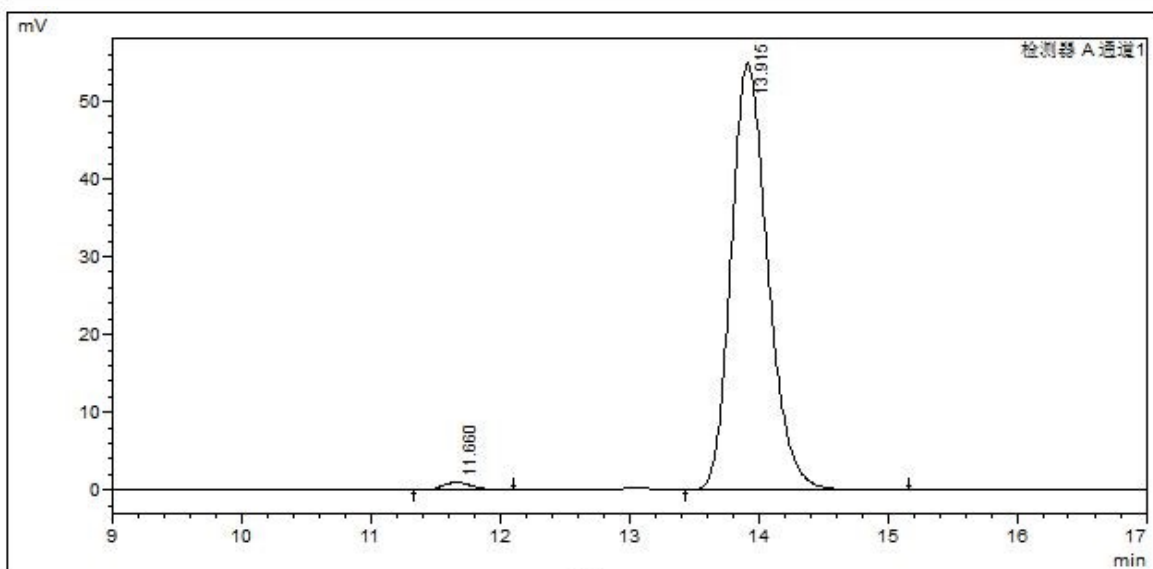

峰表

检测器 A Ch1 254nm

| 峰# | 保留时间   | 面积      | USP 峰宽 | 高度    | 面积 %   |
|----|--------|---------|--------|-------|--------|
| 1  | 11.660 | 16740   | 0.433  | 1033  | 1.518  |
| 2  | 13.915 | 1086095 | 0.518  | 54917 | 98.482 |

HPLC spectra of compound **2t** (racemic and chiral product):

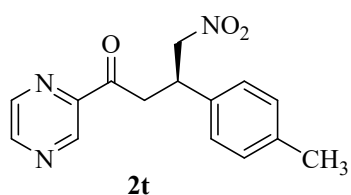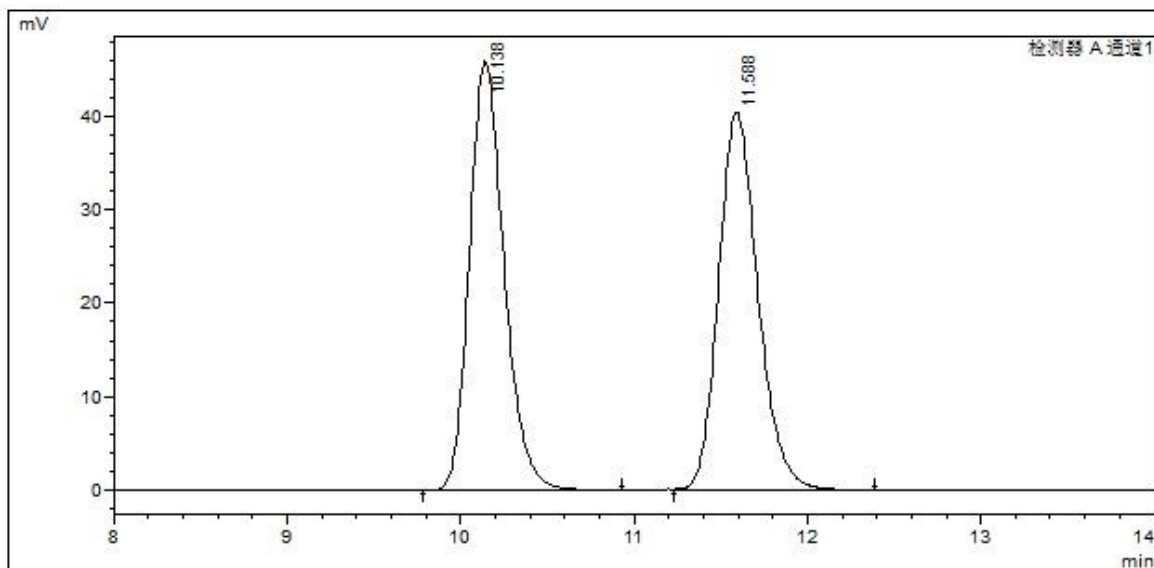

峰表

检测器 A Ch1 254nm

| 峰# | 保留时间   | 面积     | USP 峰宽 | 高度    | 面积 %   |
|----|--------|--------|--------|-------|--------|
| 1  | 10.138 | 639546 | 0.368  | 45919 | 50.155 |
| 2  | 11.588 | 635593 | 0.415  | 40391 | 49.845 |

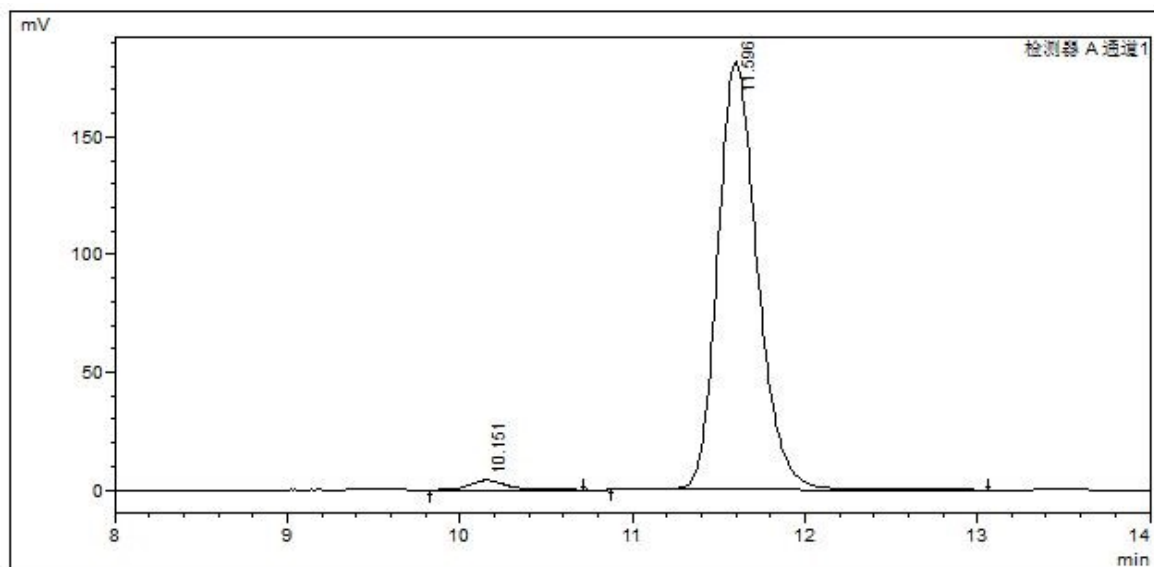

峰表

检测器 A Ch1 254nm

| 峰# | 保留时间   | 面积      | USP 峰宽 | 高度     | 面积 %   |
|----|--------|---------|--------|--------|--------|
| 1  | 10.151 | 55938   | 0.368  | 4029   | 1.883  |
| 2  | 11.596 | 2915304 | 0.419  | 181857 | 98.117 |

HPLC spectra of compound **2u** (racemic and chiral product):

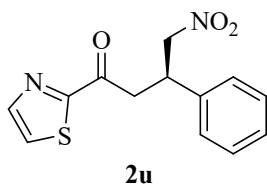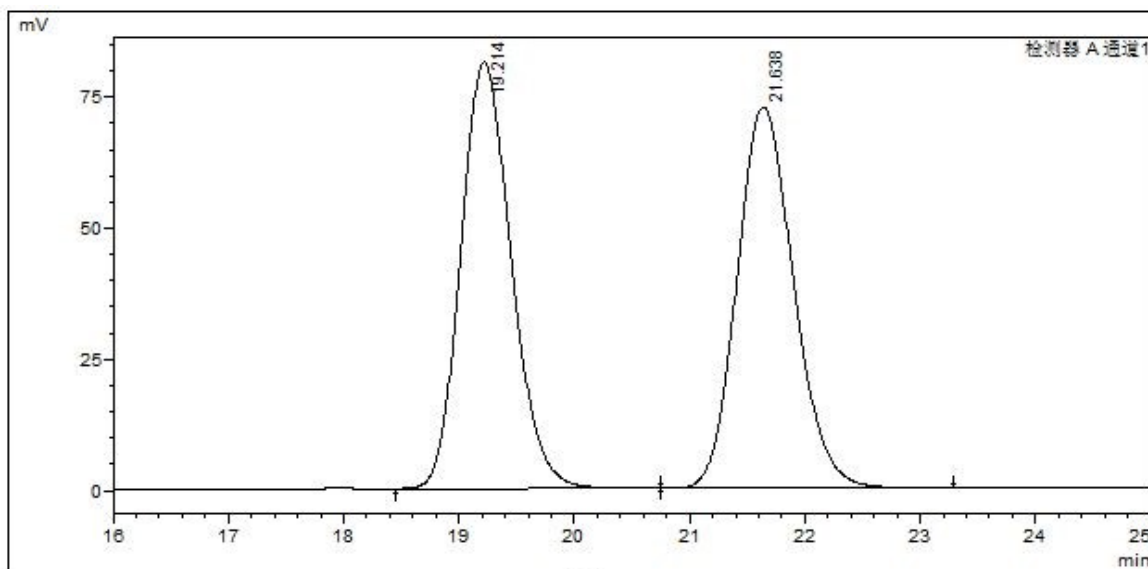

峰表

检测器 A Ch1 254nm

| 峰# | 保留时间   | 面积      | USP 峰宽 | 高度    | 面积 %   |
|----|--------|---------|--------|-------|--------|
| 1  | 19.214 | 2477688 | 0.803  | 81316 | 49.929 |
| 2  | 21.638 | 2484717 | 0.902  | 72667 | 50.071 |

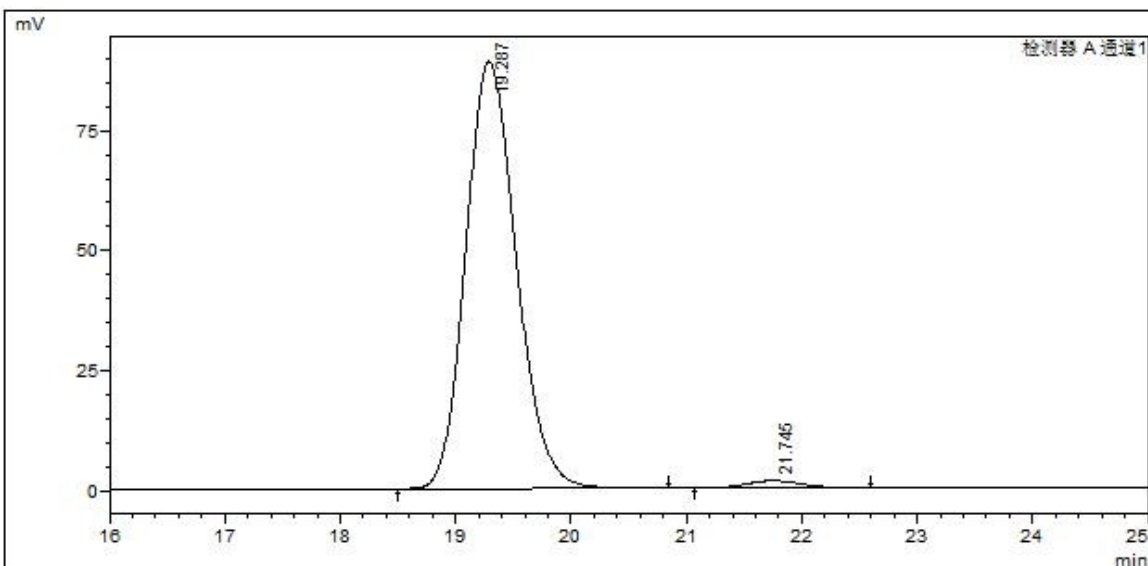

峰表

检测器 A Ch1 254nm

| 峰# | 保留时间   | 面积      | USP 峰宽 | 高度    | 面积 %   |
|----|--------|---------|--------|-------|--------|
| 1  | 19.287 | 2709957 | 0.803  | 88993 | 98.158 |
| 2  | 21.745 | 50841   | 0.881  | 1532  | 1.842  |

HPLC spectra of compound **2v** (racemic and chiral product):

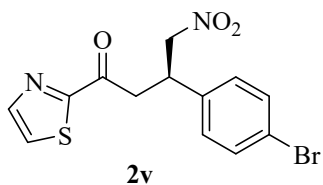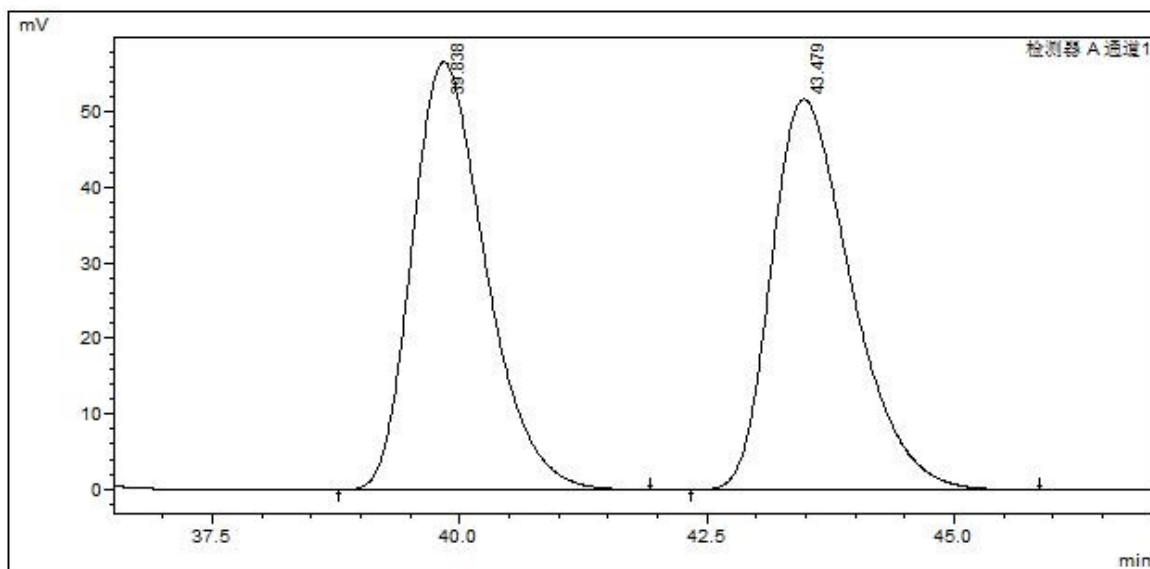

峰表

检测器 A Ch1 254nm

| 峰# | 保留时间   | 面积      | USP 峰宽 | 高度    | 面积 %   |
|----|--------|---------|--------|-------|--------|
| 1  | 39.838 | 2939685 | 1.357  | 56642 | 50.128 |
| 2  | 43.479 | 2924630 | 1.482  | 51718 | 49.872 |

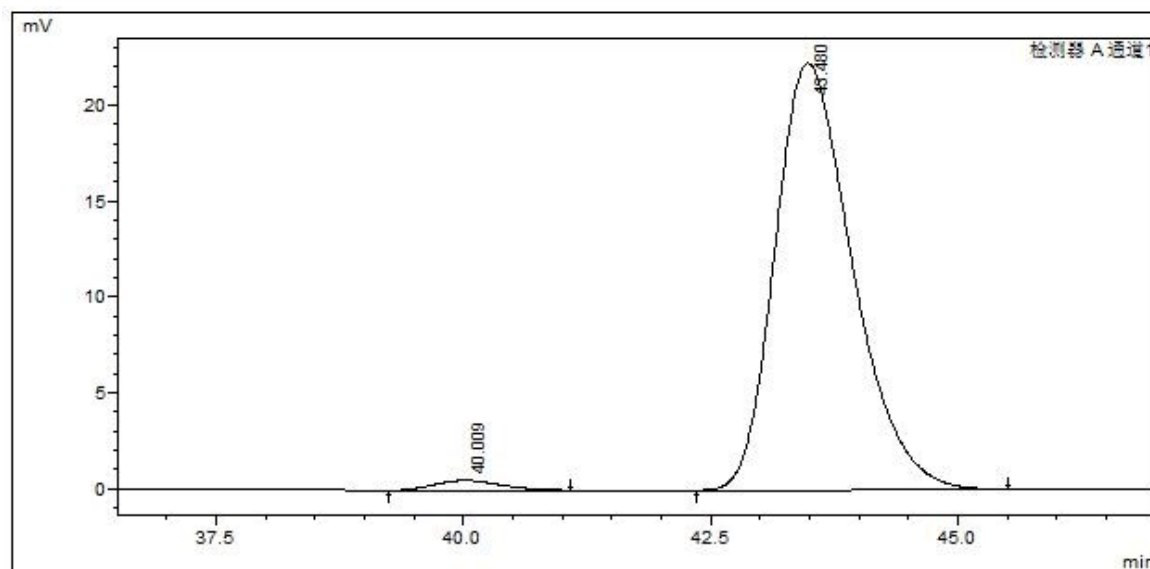

峰表

检测器 A Ch1 254nm

| 峰# | 保留时间   | 面积      | USP 峰宽 | 高度    | 面积 %   |
|----|--------|---------|--------|-------|--------|
| 1  | 40.009 | 24496   | 1.252  | 522   | 1.975  |
| 2  | 43.480 | 1215572 | 1.429  | 22283 | 98.025 |



HPLC spectra of compound **2w** (racemic and chiral product):

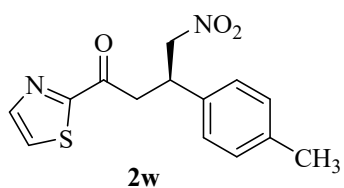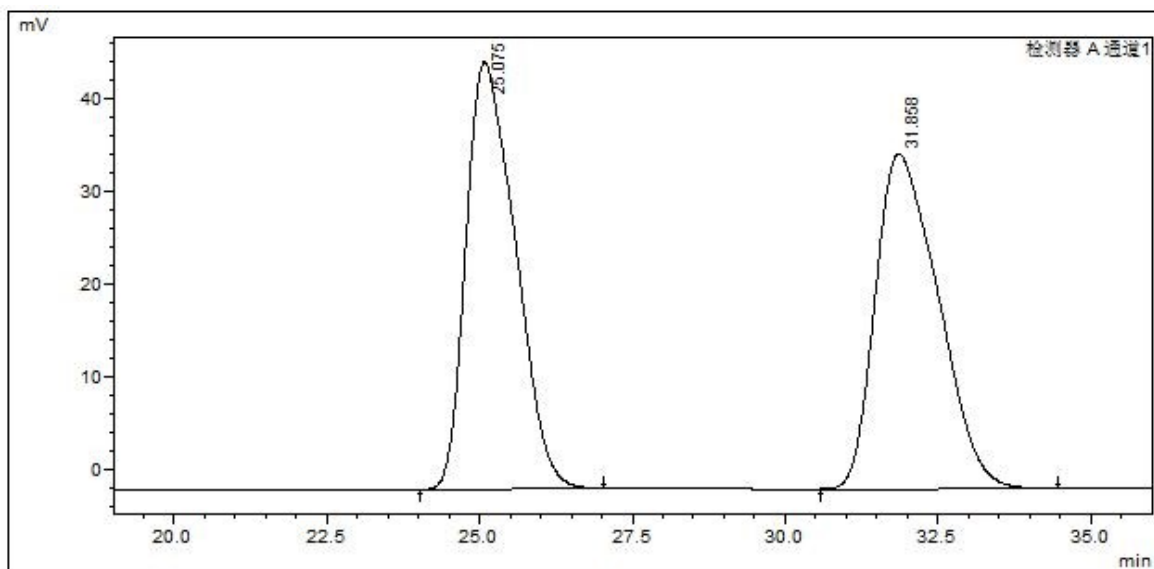

峰表

检测器 A Ch1 254nm

| 峰# | 保留时间   | 面积      | USP 峰宽 | 高度    | 面积 %   |
|----|--------|---------|--------|-------|--------|
| 1  | 25.075 | 2584628 | 1.539  | 46013 | 49.966 |
| 2  | 31.858 | 2588098 | 1.961  | 36136 | 50.034 |

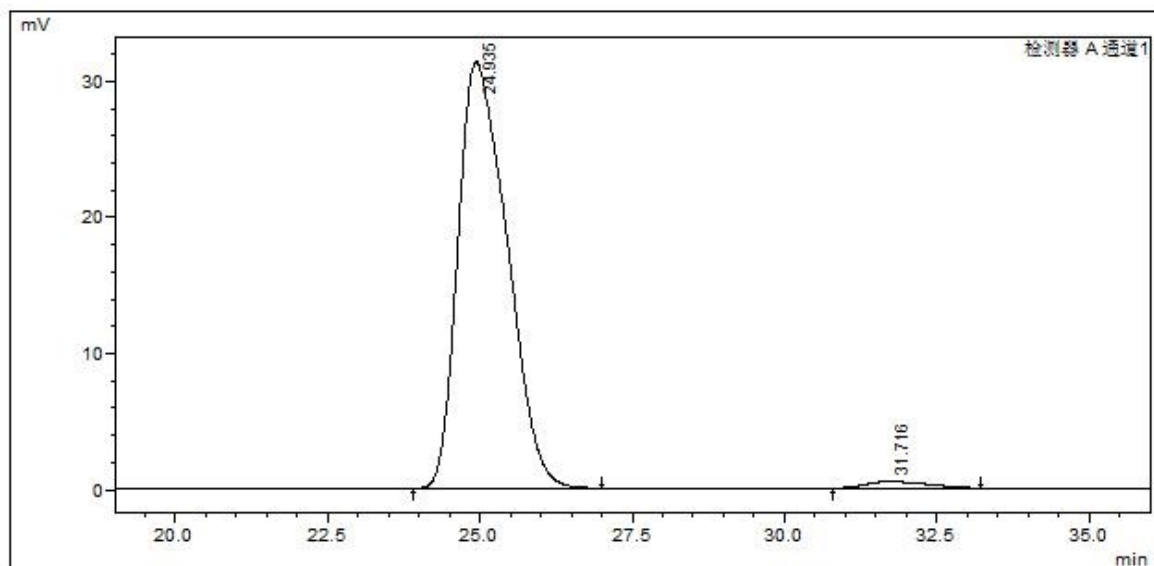

峰表

检测器 A Ch1 254nm

| 峰# | 保留时间   | 面积      | USP 峰宽 | 高度    | 面积 %   |
|----|--------|---------|--------|-------|--------|
| 1  | 24.935 | 1757554 | 1.532  | 31318 | 98.132 |
| 2  | 31.716 | 33459   | 1.950  | 486   | 1.868  |

HPLC spectra of compound **3a** (racemic and chiral product):

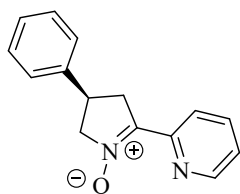

**3a**

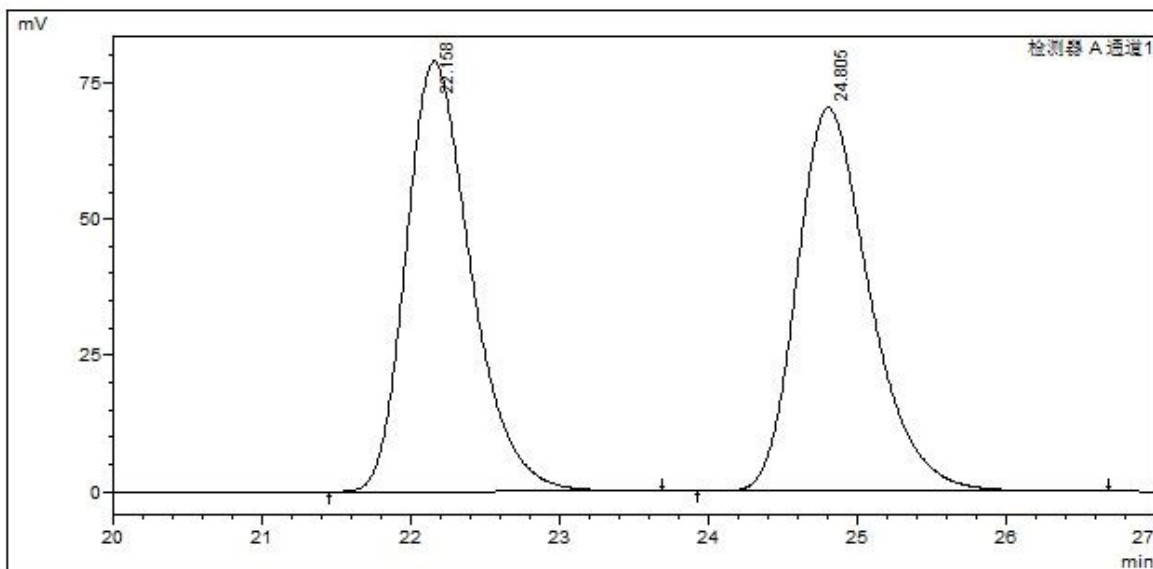

峰表

| 峰# | 保留时间   | 面积      | USP 峰宽 | 高度    | 面积 %   |
|----|--------|---------|--------|-------|--------|
| 1  | 22.158 | 2398585 | 0.788  | 78967 | 49.962 |
| 2  | 24.805 | 2402189 | 0.885  | 70383 | 50.038 |

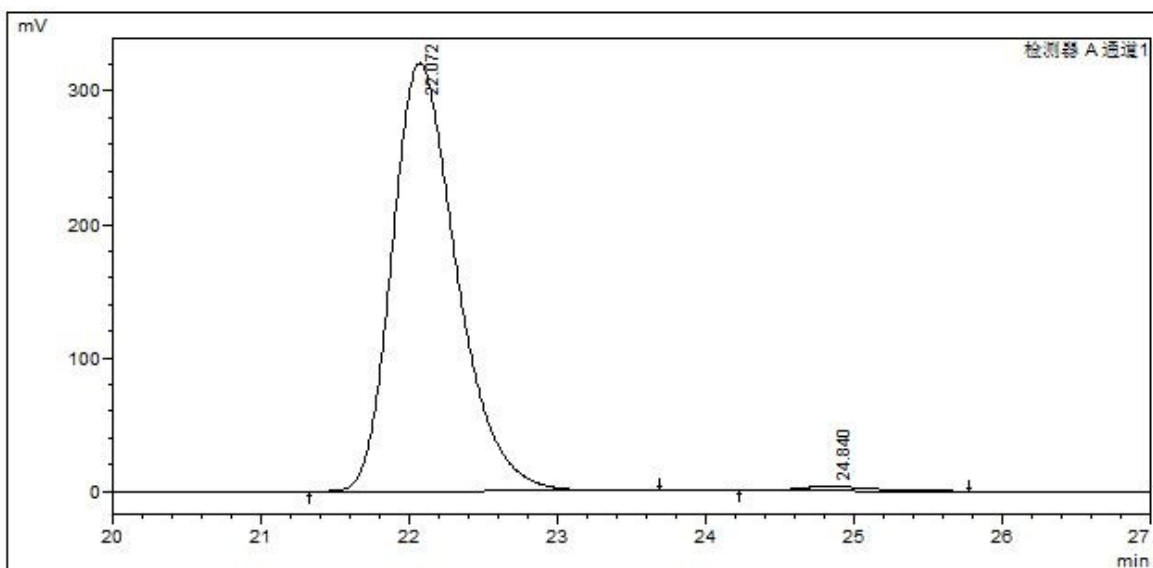

峰表

| 峰# | 保留时间   | 面积      | USP 峰宽 | 高度     | 面积 %   |
|----|--------|---------|--------|--------|--------|
| 1  | 22.072 | 9726199 | 0.789  | 320915 | 98.871 |
| 2  | 24.840 | 111034  | 0.873  | 3375   | 1.129  |

#### 4. References

1. N. Lin, X.-W. Long, Q. Chen, W.-R. Zhu, B.-C. Wang, K.-B. Chen, C.-W. Jiang, J. Weng and G. Lu, *Tetrahedron*, 2018, **74**, 3734.
2. W. Yang and D.-M. Du, *Org Lett*, 2010, **12**, 5450.
3. C. Cassani, R. Martin-Rapun, E. Arceo, F. Bravo and P. Melchiorre, *Nat Protoc*, 2013, **8**, 325.
4. A. Ciupa, M. F. Mahon, P. A. De Bank and L. Caggiano, *Org Biomol Chem*, 2012, **10**, 8753.
5. A. Ciupa, P. A. De Bank, M. F. Mahon, P. J. Wood and L. Caggiano, *Medchemcomm*, 2013, **4**, 956.
6. S. Mukherjee, S. Mondal, A. Patra, R. G. Gonnade and A. T. Biju, *Chem Commun*, 2015, **51**, 9559.
7. M. Jose Albaladejo, F. Alonso and M. Jose Gonzalez-Soria, *Acc Catalysis*, 2015, **5**, 3446.
8. M. Kucerova-Chlupacova, V. Vyskovska-Tyllova, L. Richterova-Finkova, J. Kunes, V. Buchta, M. Vejsova, P. Paterova, L. Semelkova, O. Jandourek and V. Opletalova, *Molecules (Basel, Switzerland)*, 2016, **21**, 1104.
9. A. Dondoni, A. Marra and P. Merino, *J Am Chem Soc*, 1994, **116**, 3324.
10. K. Liaras, A. Geronikaki, J. Glamočlija, A. Cirić and M. Soković, *Bioorg Med Chem*, 2011, **19**, 3135.
11. G. Blay, C. Incerti, M. Carmen Munoz and J. R. Pedro, *Eur J Org Chem*, 2013, **2013**, 1696.
12. G.-P. Zhang, C. Zhu, D.-Y. Liu, J.-K. Pan, J. Zhang, D.-Y. Hu and B.-A. Song, *Tetrahedron*, 2017, **73**, 129.
13. N. Fujieda, H. Ichihashi, M. Yuasa, Y. Nishikawa, G. Kurisu and S. Itoh, *Angew Chem Int Ed*, 2020, **59**, 7717.
14. A. J. Simpson and H. W. Lam, *Org Lett*, 2013, **15**, 2586.
15. C.-L. Cao, M.-C. Ye, X.-L. Sun and Y. Tang, *Org Lett*, 2006, **8**, 2901.
16. O. Garcia Mancheno, P. Tangen, R. Rohlmann, R. Frohlich and J. Aleman, *Chem*, 2011, **17**, 984.
17. L. Li, S. Zhang, Y.-B. Hu, Y. Li, C. Li, Z.-G. Zha and Z.-Y. Wang, *Chem*, 2015, **21**, 12885.
18. Y. Kuang, K. Maeda, R. Matsubara and M. Hayashi, *J Org Chem*, 2023, **88**, 5791.
